# Supplementary material for: Genomic and Global Gene Expression Profiling in Pediatric and Young Adult Acute Leukemia with PICALM::MLLT10 Fusion
Source: Research Square preprint supplement (doi:10.21203/rs.3.rs-3348788/v1), 2023-09-20
Supplement: Supplementary file 2 [file 70d592924555dd03c285259e.xlsx]

## Sheet: Supplementary Table S2_Final
	baseMean	log2FoldChange	lfcSE	stat	pvalue	padj
WASH7P	1251.99	0.162938	0.26928	0.605086	0.545122	0.748288
LOC729737	562.471	-0.42874	0.787027	-0.544759	0.585919	0.778125
LOC100133331	659.242	-1.38073	0.441373	-3.12827	0.0017584	0.0240115
LOC100288069	494.019	-0.517309	0.480974	-1.07554	0.282131	0.532419
FAM87B	57.5069	-1.92553	0.93526	-2.05881	0.0395121	0.180881
LINC00115	111.054	-0.604894	0.384891	-1.5716	0.116044	0.328583
LINC01128	674.779	0.00846394	0.392389	0.0215703	0.982791	0.992691
FAM41C	31.8687	-0.0494982	0.4741	-0.104405	0.916848	0.96347
NOC2L	1319.51	0.375924	0.247427	1.51933	0.128679	0.346852
KLHL17	117.994	-0.568724	0.476539	-1.19345	0.232694	0.478032
ISG15	602.278	0.0316939	0.672534	0.047126	0.962413	0.983085
AGRN	467.547	1.32277	0.557467	2.37283	0.0176523	0.112069
C1orf159	112.225	-0.0828298	0.4231	-0.195769	0.844791	0.92866
SDF4	1226.37	0.709673	0.26066	2.7226	0.00647714	0.058517
B3GALT6	288.388	0.0480414	0.372865	0.128844	0.897481	0.955382
UBE2J2	388.609	0.192894	0.333394	0.578577	0.562874	0.760951
SCNN1D	127.604	-0.557866	0.48481	-1.15069	0.249859	0.496573
ACAP3	784.521	-0.416802	0.312133	-1.33533	0.181767	0.417364
PUSL1	84.588	-0.0429511	0.323346	-0.132833	0.894325	0.95381
CPSF3L	1040.81	-0.240791	0.242619	-0.992466	0.32097	0.569725
CPTP	122.328	0.194778	0.432555	0.450297	0.652496	0.821923
TAS1R3	34.867	-1.12945	0.578826	-1.95129	0.051023	0.21054
DVL1	491.352	0.270007	0.274413	0.983943	0.325144	0.573081
MXRA8	50.582	-1.97118	1.11895	-1.76163	0.0781314	0.262835
AURKAIP1	448.404	0.382075	0.289039	1.32188	0.186209	0.423184
CCNL2	5282.82	-0.345972	0.266626	-1.29759	0.194428	0.432617
LOC148413	295.455	-0.332072	0.330577	-1.00452	0.315128	0.563403
MRPL20	548.203	0.309013	0.360078	0.858183	0.390791	0.631624
VWA1	20.2808	0.738623	1.02144	0.723122	0.469605	0.693382
ATAD3C	16.2848	0.138148	0.645948	0.213868	0.83065	0.920795
ATAD3B	830.342	0.057429	0.341803	0.168018	0.866569	0.939291
ATAD3A	461.052	0.629752	0.395475	1.5924	0.111296	0.321171
SSU72	730.316	0.106456	0.242742	0.438555	0.660984	0.826139
MIB2	385.427	-0.259018	0.345117	-0.750522	0.452941	0.68119
CDK11B	1518.22	0.0817539	0.440538	0.185578	0.852776	0.933221
SLC35E2B	2584.4	-1.03894	0.434297	-2.39222	0.0167468	0.108586
CDK11A	1120.08	0.204761	0.426653	0.479924	0.631281	0.80887
SLC35E2	1795.37	-0.925106	0.492296	-1.87917	0.060222	0.228828
NADK	1115.72	-0.712759	0.349747	-2.03793	0.0415569	0.186452
GNB1	5441.87	0.291078	0.278333	1.04579	0.295657	0.54542
PRKCZ	21.8605	-0.603051	0.730375	-0.825673	0.408989	0.644526
FAAP20	216.663	-0.273141	0.306961	-0.889823	0.373561	0.616594
SKI	955.07	-0.216924	0.550664	-0.393932	0.693631	0.84483
MORN1	125.169	-1.13785	0.567081	-2.00651	0.0448024	0.194737
LOC100129534	37.0698	-1.59617	0.587116	-2.71866	0.00655461	0.0590417
RER1	940.613	0.0457471	0.376861	0.12139	0.903382	0.958148
PEX10	178.368	-0.134331	0.403314	-0.333069	0.739082	0.870917
PLCH2	164.851	-3.10487	0.589528	-5.26671	1.38891e-07	1.32927e-05
PANK4	318.586	-0.369452	0.348442	-1.06029	0.28901	0.539416
LOC115110	152.648	-1.75891	0.561732	-3.13123	0.00174076	0.0238216
TNFRSF14	827.723	-1.04225	0.348346	-2.99198	0.00277175	0.0331263
FAM213B	239.123	-0.264427	0.509244	-0.519255	0.603583	0.789682
PRDM16	52.5328	-0.459706	1.09597	-0.419451	0.674887	0.833128
MEGF6	2065.67	0.438361	0.377425	1.16145	0.245458	0.491456
TPRG1L	558.27	-0.0103644	0.380076	-0.0272691	0.978245	0.98997
WRAP73	303.025	0.052909	0.327485	0.161562	0.871651	0.941895
TP73	52.9518	-1.13192	1.11818	-1.01229	0.311401	0.559812
TP73-AS1	106.873	-0.331182	0.708174	-0.467656	0.640031	0.814374
SMIM1	49.3268	0.168046	0.966193	0.173926	0.861924	0.937536
LRRC47	862.148	0.0846853	0.253084	0.334614	0.737916	0.870079
CEP104	757.245	-0.728073	0.418901	-1.73806	0.0822009	0.270072
DFFB	291.261	-0.367508	0.450438	-0.815889	0.414563	0.648924
C1orf174	719.661	0.0651914	0.229993	0.28345	0.776832	0.892325
NPHP4	314.024	-1.16807	0.365164	-3.19876	0.00138022	0.0204005
KCNAB2	3960.59	0.725208	0.413751	1.75276	0.0796428	0.265297
CHD5	85.5855	-1.18349	0.601456	-1.9677	0.0491023	0.205494
RPL22	10318.8	0.624274	0.418148	1.49295	0.13545	0.35571
RNF207	17.4577	-0.40812	0.991564	-0.411592	0.680639	0.837312
ICMT	989.087	0.366254	0.43591	0.840206	0.400793	0.63811
GPR153	91.3685	-2.48108	0.599357	-4.13957	3.47954e-05	0.00123339
ACOT7	277.583	-0.281819	0.324106	-0.869526	0.384559	0.626597
ESPN	40.2388	-1.35234	0.87099	-1.55264	0.120508	0.335134
TNFRSF25	323.05	-1.04167	0.452231	-2.30341	0.021256	0.124869
PLEKHG5	115.492	-3.89937	0.616799	-6.32194	2.58295e-10	6.44884e-08
NOL9	1750.28	0.141365	0.261524	0.540545	0.588822	0.780187
ZBTB48	485.475	0.155226	0.328134	0.473057	0.636173	0.811934
KLHL21	1284.52	1.13392	0.339195	3.34296	0.000828894	0.0142616
PHF13	616.925	0.79643	0.42234	1.88575	0.0593281	0.22718
THAP3	266.512	-0.0646807	0.2592	-0.24954	0.802943	0.906478
DNAJC11	849.071	-0.248509	0.380351	-0.653368	0.513519	0.726252
CAMTA1	486.48	0.695217	0.371447	1.87164	0.0612559	0.231319
VAMP3	1960.18	0.38861	0.358716	1.08333	0.27866	0.529616
PER3	218.735	0.722513	0.733241	0.985369	0.324443	0.572438
TNFRSF9	67.0961	0.74669	0.722984	1.03279	0.301703	0.551608
PARK7	1251.77	0.134676	0.331996	0.405654	0.684997	0.839148
ERRFI1	75.3415	-0.146754	0.943015	-0.155622	0.876331	0.944154
RERE	2413.32	0.0919412	0.31093	0.295697	0.767461	0.887557
ENO1	20840.3	0.61758	0.464557	1.3294	0.183717	0.420339
SLC2A5	890.175	2.86888	0.64902	4.42032	9.85537e-06	0.00044782
GPR157	33.0912	-1.63129	0.710459	-2.29611	0.0216698	0.12598
MIR34AHG	94.4458	0.502136	0.769423	0.652614	0.514005	0.72655
H6PD	3164.94	-0.928766	0.434738	-2.13638	0.0326484	0.160894
SPSB1	246.48	-1.65643	0.610651	-2.71256	0.00667654	0.0598582
LOC100506022	10.2102	-0.503071	0.732812	-0.686493	0.492402	0.711469
SLC25A33	336.417	0.8304	0.450145	1.84474	0.0650755	0.238569
TMEM201	576.984	0.203046	0.344789	0.588901	0.555928	0.756026
PIK3CD	2708.13	0.525378	0.358068	1.46725	0.142307	0.365505
PIK3CD-AS1	38.4701	-2.36841	1.0077	-2.35032	0.0187571	0.116099
PIK3CD-AS2	16.9195	-3.46077	0.720817	-4.80118	1.57735e-06	9.6616e-05
CLSTN1	2152.71	-0.0413204	0.395701	-0.104423	0.916833	0.96347
CTNNBIP1	734.047	0.43314	0.328844	1.31716	0.187786	0.424813
LZIC	1134.84	-0.0736699	0.286285	-0.25733	0.796924	0.903158
NMNAT1	201.952	-0.289734	0.501969	-0.577195	0.563808	0.761897
RBP7	20.7174	-2.57684	0.749093	-3.43994	0.000581838	0.010892
UBE4B	1593.63	0.276338	0.244611	1.1297	0.258602	0.507038
KIF1B	1468.63	0.203905	0.463202	0.440207	0.659787	0.82584
RNU6-2	85.7193	0.843002	0.611473	1.37864	0.168005	0.399293
PGD	3377.5	0.66786	0.466397	1.43196	0.152156	0.380217
APITD1-CORT	8.81061	-0.491298	0.800787	-0.613519	0.539533	0.744351
APITD1	118.003	0.0613665	0.364774	0.168232	0.866401	0.939271
CORT	14.0083	-1.35221	0.945315	-1.43044	0.152591	0.380869
DFFA	590.065	-0.166169	0.218396	-0.760861	0.44674	0.675539
PEX14	195.872	-0.0534585	0.333397	-0.160345	0.872609	0.942404
CASZ1	1035.37	0.946816	0.513873	1.84251	0.0654009	0.239246
TARDBP	4672.98	-0.0115185	0.247456	-0.0465476	0.962874	0.983288
SRM	346.714	0.80991	0.341418	2.37219	0.0176829	0.112124
EXOSC10	2194.66	0.114825	0.233608	0.491528	0.623053	0.803031
MTOR	3479.11	-0.168821	0.303331	-0.556558	0.57783	0.771901
UBIAD1	446.295	0.624534	0.225923	2.76437	0.00570329	0.0535465
DISP3	98.7253	-2.14342	0.711185	-3.01388	0.00257933	0.0313471
FBXO44	440.132	-1.67926	0.531236	-3.16105	0.00157202	0.0223099
FBXO6	152.79	0.119589	0.515809	0.231848	0.816656	0.914355
MAD2L2	775.703	-0.0125066	0.291687	-0.0428769	0.9658	0.984427
DRAXIN	35.862	-1.95695	0.77202	-2.53484	0.0112498	0.0839884
AGTRAP	561.754	1.37166	0.747942	1.83391	0.0666669	0.241456
MTHFR	1073.14	-0.0622987	0.253428	-0.245824	0.805819	0.907784
CLCN6	698.42	-0.11609	0.311399	-0.3728	0.709297	0.852883
NPPA-AS1	32.493	-0.342692	0.545922	-0.627731	0.53018	0.736987
KIAA2013	786.541	0.426234	0.418112	1.01943	0.308	0.557047
PLOD1	435.11	0.967952	0.546607	1.77084	0.0765876	0.259984
MFN2	2670.14	0.574902	0.342321	1.67942	0.0930693	0.29097
MIIP	479.771	0.192854	0.242057	0.79673	0.425608	0.659026
TNFRSF8	30.5962	-3.09285	0.754881	-4.09714	4.18291e-05	0.0014234
TNFRSF1B	1574.35	0.107642	0.596294	0.180519	0.856745	0.934692
VPS13D	6674.29	-0.374304	0.298549	-1.25374	0.209935	0.451444
SNORA59A	43.8545	1.00447	0.524359	1.91561	0.0554143	0.219663
SNORA59B	43.8545	1.00447	0.524359	1.91561	0.0554143	0.219663
DHRS3	1087.94	0.806725	0.775473	1.0403	0.2982	0.548114
PRDM2	3896.04	0.155222	0.428405	0.362326	0.717108	0.856969
KAZN	298.189	-1.98701	0.761869	-2.60808	0.00910516	0.0733056
TMEM51	28.8083	0.162872	1.10252	0.147728	0.882558	0.947022
EFHD2	2588.53	0.627619	0.446603	1.40532	0.159927	0.389342
CASP9	285.368	-0.293273	0.395522	-0.741485	0.4584	0.685562
DNAJC16	620.321	-0.0186265	0.331528	-0.0561837	0.955195	0.980159
AGMAT	62.7452	-0.681306	0.519903	-1.31045	0.190044	0.427082
DDI2	612.041	-0.112306	0.323954	-0.346674	0.728836	0.864699
RSC1A1	654.772	0.0366348	0.379934	0.0964243	0.923184	0.965424
PLEKHM2	2807.7	0.573353	0.488418	1.1739	0.240435	0.486639
SLC25A34	69.8274	-0.814236	0.465442	-1.74938	0.0802251	0.266504
FBLIM1	67.3135	-3.28628	0.892201	-3.68334	0.0002302	0.00540653
UQCRHL	213.079	0.267365	0.32755	0.816259	0.414352	0.648875
FLJ37453	317.094	-0.402139	0.411396	-0.977499	0.328322	0.576097
SPEN	8325.38	-0.127068	0.379257	-0.335043	0.737593	0.870032
ZBTB17	1060.7	0.387124	0.336197	1.15148	0.249535	0.496465
EPHA2	11.3385	-1.35222	1.02277	-1.32211	0.18613	0.423106
ARHGEF19	132.074	-0.391526	0.391964	-0.998883	0.317851	0.566158
RSG1	50.8817	0.136167	0.332881	0.409056	0.682498	0.838243
FBXO42	1543.04	0.340385	0.293684	1.15902	0.246449	0.492609
SZRD1	3154.97	0.446053	0.327609	1.36154	0.173342	0.406865
NECAP2	1149.64	-0.0984708	0.233927	-0.420947	0.673794	0.832282
CROCCP3	301.265	-1.92629	0.527956	-3.64857	0.000263702	0.00596465
NBPF1	1498.64	-1.12809	0.460702	-2.44863	0.01434	0.0986914
CROCCP2	580.188	-0.530384	0.285568	-1.85729	0.0632695	0.235478
MST1P2	56.7419	-0.341164	0.548403	-0.622105	0.533873	0.73997
MST1L	36.0519	-1.08129	0.659402	-1.6398	0.101047	0.304652
LOC105376805	49.1924	0.468832	0.553581	0.846908	0.397047	0.635719
CROCC	611.43	-1.44042	0.384072	-3.7504	0.000176553	0.00440319
ATP13A2	654.692	0.492939	0.25926	1.90134	0.0572581	0.222706
SDHB	911.769	0.636498	0.308506	2.06317	0.0390968	0.179973
PADI2	233.426	-3.1601	0.7238	-4.36598	1.26553e-05	0.000550543
PADI4	296.688	-2.72258	0.842	-3.23348	0.00122294	0.0189716
RCC2	6618.17	0.702042	0.262789	2.6715	0.0075512	0.0651812
ARHGEF10L	39.5316	-1.64134	0.638959	-2.56876	0.0102062	0.0788126
ALDH4A1	280.269	1.3018	0.439487	2.96209	0.00305555	0.0354199
IFFO2	1733.7	0.873315	0.631284	1.3834	0.166544	0.397612
UBR4	18796.6	-0.114977	0.305205	-0.376722	0.706381	0.851449
LOC101927895	39.4235	-0.0208195	0.415789	-0.0500722	0.960065	0.982194
EMC1	1437.54	0.366065	0.273714	1.3374	0.181092	0.416285
MRTO4	598.332	0.567349	0.322737	1.75793	0.0787598	0.2643
AKR7L	55.7133	0.0377499	0.563481	0.0669941	0.946586	0.977105
AKR7A3	28.6329	-0.138408	0.480488	-0.288057	0.773303	0.891283
LOC100506730	101.32	-0.578978	0.37761	-1.53327	0.12521	0.341917
AKR7A2	613.23	0.137012	0.333433	0.410914	0.681135	0.8375
PQLC2	178.638	0.524434	0.42333	1.23883	0.215409	0.458159
CAPZB	1654.04	-0.0209861	0.317559	-0.0660857	0.94731	0.977158
MINOS1-NBL1	64.0711	-0.33424	0.977835	-0.341817	0.732489	0.866819
MINOS1	304.509	0.626672	0.303562	2.0644	0.0389802	0.17987
RPS14P3	111.515	0.266759	0.341536	0.781058	0.434768	0.665656
NBL1	163.748	0.0222662	1.66962	0.0133361	0.98936	0.995667
TMCO4	337.398	-0.385206	0.372308	-1.03464	0.300836	0.550844
OTUD3	1580.62	0.405323	0.285148	1.42145	0.155186	0.384342
UBXN10	201.897	-0.600457	0.831693	-0.721969	0.470313	0.693826
CAMK2N1	27.1902	-0.140803	0.949613	-0.148274	0.882127	0.946882
MUL1	708.751	0.844895	0.557939	1.51431	0.129946	0.348488
CDA	133.511	0.348472	1.10894	0.314239	0.75334	0.8791
PINK1	445.37	0.243458	0.452554	0.537966	0.590601	0.781463
PINK1-AS	648.195	-0.262285	0.319144	-0.821837	0.411169	0.646483
DDOST	3722.9	1.00192	0.385977	2.59581	0.00943686	0.0747749
HP1BP3	7805.6	-0.350366	0.214007	-1.63717	0.101595	0.305945
EIF4G3	2222.79	0.637618	0.273801	2.32876	0.0198717	0.12032
ECE1	1252.34	-1.90086	0.616275	-3.08444	0.00203934	0.0266529
LOC100506801	76.4942	-3.88731	0.85941	-4.52323	6.09018e-06	0.000301809
NBPF3	357.516	-0.213769	0.531256	-0.402385	0.687401	0.840547
ALPL	26.5799	0.426501	0.765208	0.557366	0.577278	0.771433
RAP1GAP	145.195	-0.599972	0.684719	-0.876231	0.380904	0.623042
USP48	2340.75	-0.0242681	0.206928	-0.117278	0.90664	0.959592
LDLRAD2	15.6919	-0.517194	0.672427	-0.769146	0.441807	0.671236
HSPG2	666.028	0.971729	0.782203	1.2423	0.214127	0.456483
LOC101928043	13.7393	-0.126145	0.883202	-0.142827	0.886427	0.948822
LINC00339	209.293	-0.211923	0.358095	-0.591807	0.55398	0.754651
CDC42	13258.1	0.685804	0.429482	1.59682	0.110306	0.320029
ZBTB40	2562.9	-0.136903	0.266155	-0.514374	0.60699	0.791792
C1QA	145.783	-2.38088	0.884941	-2.69044	0.00713579	0.0625475
C1QC	88.7842	-2.29806	1.08884	-2.11055	0.0348112	0.167642
C1QB	137.856	-1.81065	1.03729	-1.74555	0.0808887	0.267698
EPHB2	27.8077	-0.0846526	0.733112	-0.11547	0.908072	0.960113
KDM1A	3409.21	0.321982	0.264591	1.2169	0.223641	0.467269
LUZP1	6125.79	1.79723	0.425701	4.22181	2.42349e-05	0.00093928
LINC01355	287.707	-1.91533	0.852729	-2.24612	0.0246962	0.135789
HNRNPR	7036.22	-0.178663	0.225631	-0.791836	0.428456	0.66112
ZNF436	659.308	0.277545	0.400205	0.693507	0.487991	0.706972
ZNF436-AS1	144.09	-0.950536	0.473211	-2.00869	0.0445697	0.194167
TCEA3	167.268	-2.39784	0.86275	-2.7793	0.00544763	0.0519532
ASAP3	65.6434	-2.454	0.74691	-3.28554	0.00101789	0.0165466
E2F2	2490.65	-0.681368	0.711022	-0.958294	0.337914	0.585664
ID3	111.054	-2.57189	0.639302	-4.02296	5.74706e-05	0.00181453
RPL11	24883.1	0.572305	0.491359	1.16474	0.244125	0.489948
TCEB3	2213.66	0.787664	0.364672	2.15992	0.0307787	0.155395
TCEB3-AS1	30.7149	-0.509848	0.607289	-0.839547	0.401162	0.638432
PITHD1	1736.11	0.53685	0.342423	1.5678	0.116928	0.329868
LYPLA2	543.418	0.371424	0.274936	1.35095	0.176712	0.41137
GALE	103.363	0.391476	0.4292	0.912108	0.361712	0.606647
HMGCL	229.339	-0.0172404	0.399048	-0.0432039	0.965539	0.984368
FUCA1	389.641	0.958244	0.39767	2.40965	0.015968	0.10526
CNR2	282.363	-0.885765	0.776445	-1.1408	0.253955	0.501637
PNRC2	5640.89	0.366444	0.263137	1.3926	0.163742	0.393791
SRSF10	9574.45	0.268207	0.361204	0.742537	0.457762	0.684917
IFNLR1	119.53	-0.763141	0.750926	-1.01627	0.309502	0.558043
STPG1	82.46	0.297984	0.28504	1.04541	0.295833	0.545564
NIPAL3	840.316	-0.192993	0.436375	-0.442264	0.658298	0.824929
RCAN3	852.034	0.714482	0.4048	1.76503	0.0775594	0.261719
SRRM1	4044.12	0.358031	0.32368	1.10613	0.268671	0.519401
CLIC4	2907.9	0.95366	0.59142	1.61249	0.106855	0.314064
RUNX3	1884.14	0.460797	0.613865	0.750648	0.452864	0.68119
SYF2	2631.24	0.426797	0.44896	0.950637	0.341789	0.588532
RSRP1	6491.02	-0.345283	0.299887	-1.15138	0.249578	0.496465
RHD	286.506	-2.01111	0.881814	-2.28065	0.0225693	0.129037
TMEM50A	2001.51	0.650385	0.351331	1.85121	0.06414	0.237011
RHCE	385.802	0.407336	1.02951	0.395658	0.692357	0.844181
TMEM57	2596.16	0.449262	0.314859	1.42687	0.153618	0.38216
LDLRAP1	180.283	0.827882	0.638466	1.29667	0.194744	0.432943
MAN1C1	57.3313	-0.557671	0.836204	-0.666908	0.504831	0.721122
SEPN1	557.27	-0.515301	0.674354	-0.76414	0.444784	0.673378
MTFR1L	472.272	0.286389	0.333621	0.858426	0.390657	0.631624
LOC646471	81.6884	-1.15214	0.925371	-1.24505	0.213112	0.455145
AUNIP	173.939	0.787901	0.529208	1.48883	0.136532	0.357537
PAQR7	245.909	0.627328	0.519152	1.20837	0.226905	0.47126
STMN1	7602.39	-0.721501	0.48876	-1.47619	0.139894	0.362107
PAFAH2	552.259	-1.64918	0.439593	-3.75161	0.000175701	0.00438908
PDIK1L	1215.77	0.194813	0.308592	0.631296	0.527847	0.735279
ZNF593	178.912	1.27662	0.377459	3.38215	0.000719218	0.0128661
CNKSR1	21.0025	-0.644518	0.482615	-1.33547	0.181723	0.417364
CEP85	2289.27	0.352913	0.280797	1.25683	0.208816	0.449707
SH3BGRL3	2971.25	0.809139	0.475922	1.70015	0.0891024	0.284315
UBXN11	338.801	-0.574429	0.317265	-1.81056	0.0702085	0.248292
CD52	818.856	-1.67052	0.48612	-3.43643	0.000589439	0.010994
DHDDS	506.906	-0.374501	0.291767	-1.28356	0.199296	0.438091
LOC101928324	26.584	-1.0919	0.709722	-1.53849	0.12393	0.340216
HMGN2	10738	-0.00513127	0.391079	-0.0131208	0.989531	0.995709
RPS6KA1	2135.55	0.884631	0.435199	2.03271	0.0420823	0.187722
ARID1A	5565.27	-0.164717	0.310392	-0.530674	0.595645	0.785148
PIGV	367.115	0.283858	0.389562	0.72866	0.466209	0.690701
ZDHHC18	1079.32	-0.632868	0.336277	-1.88199	0.0598379	0.227992
SFN	14.0519	-1.64194	0.666752	-2.46259	0.0137939	0.0961864
GPN2	375.649	0.303481	0.323872	0.937042	0.348737	0.594416
GPATCH3	614.919	0.837909	0.40663	2.06062	0.0393394	0.18033
NUDC	1082.53	0.216051	0.252025	0.857258	0.391302	0.631735
SLC9A1	561.912	0.0715627	0.590718	0.121145	0.903576	0.958148
WDTC1	1310.33	-0.309063	0.343409	-0.899988	0.368127	0.611468
TMEM222	492.573	0.380929	0.312985	1.21708	0.223572	0.467269
ACTG1P20	371.448	-0.313501	0.277596	-1.12934	0.258754	0.507206
SYTL1	1207.42	-0.903002	0.503206	-1.7945	0.0727339	0.253418
MAP3K6	105.864	0.64741	0.690188	0.93802	0.348234	0.593887
GPR3	26.0586	-0.766674	0.895681	-0.855968	0.392015	0.632103
WASF2	5681.39	0.63103	0.281967	2.23796	0.025224	0.137781
AHDC1	758.267	0.436804	0.414295	1.05433	0.291732	0.542355
FGR	1920.83	-0.93987	0.960949	-0.978065	0.328042	0.575804
IFI6	1080.06	0.191335	0.706112	0.27097	0.786414	0.898247
FAM76A	512.221	0.44043	0.335723	1.31189	0.189559	0.426555
STX12	814.992	0.0933485	0.251587	0.371039	0.710608	0.853414
PPP1R8	1430.01	0.668492	0.299518	2.23189	0.025622	0.139061
SCARNA1	201.719	1.01766	0.549632	1.85152	0.0640945	0.236901
THEMIS2	1504.36	0.289708	0.693388	0.417816	0.676082	0.83382
RPA2	628.757	0.322644	0.37541	0.859443	0.390096	0.63162
SMPDL3B	45.8389	2.11429	0.514491	4.10948	3.96549e-05	0.00138008
XKR8	232.671	-0.0524969	0.45136	-0.116308	0.907408	0.959898
EYA3	732.134	-0.174588	0.29412	-0.593593	0.552784	0.753631
PTAFR	485.915	0.214794	0.746973	0.287553	0.773689	0.891497
DNAJC8	1990.12	0.53683	0.305074	1.75967	0.0784638	0.263775
ATPIF1	1150.47	0.833068	0.477354	1.74518	0.0809538	0.267698
SESN2	754.764	1.53821	0.749438	2.05249	0.0401222	0.182366
MED18	289.288	0.206652	0.394155	0.52429	0.600077	0.787199
PHACTR4	1479.32	0.0575082	0.338608	0.169837	0.865138	0.938773
SNHG3	2481.61	0.354272	0.402985	0.879121	0.379336	0.621857
RCC1	1120.49	0.264763	0.317824	0.833049	0.404817	0.640985
SNORA73B	35809.9	1.00799	0.605684	1.66422	0.0960687	0.296282
TRNAU1AP	338.937	-0.281574	0.319259	-0.88196	0.377798	0.620245
SNHG12	192.152	0.891537	0.382932	2.32818	0.0199023	0.120358
SNORA61	316.415	0.233418	0.541509	0.431052	0.666431	0.829092
SNORA44	126.238	-0.330144	0.619021	-0.533333	0.593803	0.783669
SNORA16A	62.1006	0.248287	0.628717	0.394911	0.692909	0.844546
RAB42	14.8064	0.582067	0.637363	0.913242	0.361115	0.606389
TAF12	354.794	0.205241	0.245767	0.835104	0.403659	0.639879
RNU11	845.425	-0.331803	0.756392	-0.438665	0.660904	0.826139
GMEB1	841.92	0.35439	0.273564	1.29546	0.195163	0.43356
YTHDF2	4147.57	0.549092	0.307605	1.78506	0.0742522	0.255821
EPB41	8103.09	-0.257377	0.337551	-0.762482	0.445772	0.674517
SRSF4	2191.14	-0.0644084	0.257145	-0.250475	0.80222	0.906129
MECR	155.44	0.0516182	0.407457	0.126684	0.899191	0.95557
PTPRU	15.3868	-1.7309	0.945922	-1.82986	0.0672714	0.242402
MATN1	48.7354	0.0619876	0.787254	0.078739	0.93724	0.972907
MATN1-AS1	68.7776	-0.377436	0.406442	-0.928632	0.35308	0.598286
LAPTM5	17424.3	0.937782	0.543762	1.72462	0.0845963	0.274687
SDC3	96.6484	-1.7651	0.743092	-2.37535	0.0175323	0.11168
PUM1	5673.36	0.283818	0.301878	0.940176	0.347127	0.593356
SNRNP40	1019.16	0.404007	0.280461	1.44051	0.149723	0.376471
ZCCHC17	407.698	0.0405831	0.245825	0.165089	0.868874	0.940465
FABP3	21.1204	-2.25594	0.878277	-2.56859	0.0102112	0.0788126
SERINC2	84.4613	-1.80839	0.73292	-2.46737	0.0136109	0.0953014
LINC01225	346.948	-3.8407	1.09857	-3.49611	0.000472101	0.00936436
LINC01226	856.448	-3.71784	1.05145	-3.53591	0.000406373	0.00829705
TINAGL1	70.6375	-1.77511	1.06034	-1.67409	0.0941124	0.293377
PEF1	754.384	-0.0123131	0.242816	-0.0507098	0.959557	0.982042
COL16A1	32.4594	-1.63903	0.850089	-1.92807	0.0538465	0.216418
ADGRB2	341.821	-7.09397	0.899002	-7.89094	2.99919e-15	3.53282e-12
PTP4A2	14763.7	-0.407381	0.387889	-1.05025	0.293602	0.543906
KHDRBS1	5408.36	-0.543867	0.292883	-1.85695	0.0633189	0.235478
TMEM39B	252.883	-0.635168	0.289249	-2.19592	0.0280974	0.146795
KPNA6	3503.88	0.505011	0.239231	2.11098	0.0347744	0.167558
TXLNA	2642.14	0.506537	0.253144	2.00098	0.0453941	0.196143
CCDC28B	115.421	-0.393568	0.302683	-1.30026	0.19351	0.431516
IQCC	148.94	-0.247772	0.426579	-0.580836	0.561351	0.759966
TMEM234	135.931	-0.278815	0.298491	-0.934083	0.350261	0.595884
EIF3I	2462.13	0.603974	0.381782	1.58198	0.113653	0.325024
MTMR9LP	32.5236	-1.47556	0.727262	-2.02892	0.0424667	0.188747
LCK	2479.16	-4.791	0.564367	-8.48916	2.08139e-17	1.02394e-13
HDAC1	2297.29	0.0963854	0.265204	0.363438	0.716278	0.856763
MARCKSL1	1663.55	-0.851729	0.440104	-1.93529	0.0529546	0.214509
FAM229A	17.6791	0.119756	0.47578	0.251705	0.801269	0.905517
TSSK3	141.197	-1.14303	1.19341	-0.957791	0.338168	0.585854
BSDC1	3146.11	0.042936	0.274133	0.156625	0.875541	0.943833
ZBTB8A	1232.87	1.01226	0.719139	1.4076	0.159248	0.38861
ZBTB8OS	223.882	0.163616	0.205145	0.79756	0.425126	0.658635
RBBP4	7057.15	-0.349618	0.222763	-1.56946	0.116541	0.329201
SYNC	32.0624	-0.970614	1.10483	-0.878519	0.379662	0.622059
KIAA1522	199.992	0.326743	0.583518	0.559953	0.575511	0.77035
YARS	1867.8	0.520586	0.288474	1.80462	0.0711348	0.250571
S100PBP	1627.8	-0.532874	0.350294	-1.52122	0.128205	0.346001
FNDC5	16.6192	-1.73277	0.925459	-1.87234	0.0611599	0.231302
RNF19B	1572.46	0.841778	0.487643	1.72622	0.0843081	0.274449
AK2	3894.5	0.859317	0.402258	2.13624	0.0326601	0.160894
AZIN2	65.1363	-3.26614	0.648976	-5.03277	4.83454e-07	3.59375e-05
TRIM62	382.32	-0.12575	0.287354	-0.437615	0.661665	0.826434
ZNF362	616.072	0.110628	0.234807	0.471145	0.637537	0.812923
PHC2	2238.08	0.466178	0.440499	1.0583	0.289921	0.540487
ZSCAN20	172.987	-0.674062	0.435737	-1.54695	0.121876	0.337058
SMIM12	793.51	0.111641	0.275617	0.405058	0.685435	0.839466
DLGAP3	13.6373	0.790996	0.829724	0.953324	0.340426	0.587573
LOC653160	56.8383	-0.366961	0.467159	-0.785516	0.432151	0.663994
ZMYM6NB	169.987	0.239918	0.534327	0.44901	0.653424	0.822404
ZMYM6	2083.01	0.576717	0.32591	1.76956	0.0768008	0.26042
ZMYM1	866.041	-0.143254	0.45535	-0.314603	0.753063	0.8791
SFPQ	21452.9	0.684467	0.415786	1.6462	0.099723	0.302449
ZMYM4	3321.94	-0.119749	0.278741	-0.429607	0.667481	0.829553
KIAA0319L	1346.84	-0.242467	0.418301	-0.579646	0.562154	0.760648
NCDN	331.525	-0.335762	0.473546	-0.709038	0.478301	0.699143
TFAP2E	83.2496	-0.473158	0.385953	-1.22595	0.220219	0.463406
PSMB2	1955.21	0.444564	0.318584	1.39544	0.162884	0.393113
C1orf216	521.372	1.00966	0.296522	3.40501	0.00066161	0.0119755
CLSPN	1494.94	-0.139792	0.529039	-0.264237	0.791597	0.900775
AGO4	2879.54	0.50575	0.329738	1.5338	0.12508	0.341775
AGO1	2514.92	0.0102765	0.208378	0.0493166	0.960667	0.982509
AGO3	1105.62	-0.23419	0.291797	-0.802578	0.422219	0.655857
ADPRHL2	398.601	0.415525	0.342174	1.21437	0.224607	0.468734
COL8A2	48.6264	-1.0277	0.75876	-1.35444	0.175595	0.410016
TRAPPC3	651.415	0.0965239	0.222389	0.434032	0.664265	0.827926
MAP7D1	2137.52	0.843747	0.443157	1.90395	0.0569172	0.222508
THRAP3	5217.4	0.110127	0.161465	0.682048	0.495208	0.713505
SH3D21	156.15	-1.72617	0.705759	-2.44584	0.0144514	0.099132
EVA1B	46.9608	0.761263	0.518905	1.46706	0.142361	0.365521
STK40	690.165	0.245996	0.406618	0.604981	0.545191	0.748288
LSM10	146.514	0.313133	0.37355	0.838262	0.401884	0.63844
OSCP1	19.7247	-0.33799	0.758343	-0.445695	0.655817	0.823766
MRPS15	638.271	0.392076	0.332011	1.18091	0.237638	0.48367
CSF3R	2334.46	0.457194	0.750889	0.60887	0.542611	0.746249
LINC01137	33.3695	-0.810472	0.451554	-1.79485	0.0726773	0.253337
ZC3H12A	765.236	-0.256676	0.544939	-0.471019	0.637627	0.812923
MEAF6	1592.97	0.261208	0.182463	1.43157	0.152268	0.380309
SNIP1	1319.88	0.553815	0.474054	1.16825	0.242705	0.489082
DNALI1	29.9568	-0.828229	0.756551	-1.09474	0.273629	0.525072
GNL2	1668.73	0.779217	0.317167	2.4568	0.014018	0.0969545
C1orf109	219.285	0.317326	0.379879	0.835334	0.403529	0.63974
CDCA8	530.415	-0.264	0.638944	-0.413183	0.679473	0.836531
MANEAL	264.068	0.379833	0.400886	0.947484	0.343392	0.590164
YRDC	626.653	0.612202	0.444959	1.37586	0.168864	0.400217
C1orf122	155.94	0.53571	0.413822	1.29454	0.195478	0.434068
MTF1	1031.79	0.354311	0.375346	0.943958	0.345191	0.591821
INPP5B	1324.06	0.777547	0.228116	3.40855	0.000653079	0.0118491
SF3A3	2626.91	0.643353	0.294518	2.18442	0.0289311	0.149697
FHL3	304.739	1.94849	0.702712	2.77282	0.00555729	0.0526937
UTP11L	675.352	1.08339	0.295313	3.6686	0.000243885	0.00563289
RRAGC	821.357	1.01705	0.328636	3.09476	0.00196975	0.0259354
MYCBP	452.69	0.728103	0.380128	1.91541	0.0554397	0.219682
AKIRIN1	3398.65	1.03828	0.4571	2.27144	0.0231203	0.130787
NDUFS5	1519.91	0.513178	0.329591	1.55702	0.119467	0.333892
MACF1	38212.5	-0.0785678	0.378655	-0.207492	0.835626	0.923379
KIAA0754	1612.79	-0.905904	0.454327	-1.99395	0.0461578	0.198324
BMP8A	95.6848	-3.15023	0.984913	-3.19848	0.00138153	0.0204005
PPIEL	153.098	-1.83985	0.575554	-3.19666	0.00139027	0.0205071
PABPC4	3106.56	0.780941	0.293651	2.65942	0.00782761	0.0665895
SNORA55	31.5083	0.132743	0.705079	0.188266	0.850668	0.932702
HEYL	12.2221	-1.08201	1.01002	-1.07128	0.284044	0.534344
HPCAL4	59.022	-0.597692	0.95951	-0.622914	0.533341	0.739696
PPIE	547.699	-0.353833	0.379643	-0.932016	0.351328	0.59697
BMP8B	28.0542	-2.21438	0.780593	-2.8368	0.00455688	0.0460178
TRIT1	597.162	0.096574	0.289297	0.333823	0.738513	0.870443
MYCL	40.2047	0.439255	0.704376	0.623609	0.532885	0.73932
MFSD2A	135.514	0.237281	0.70089	0.338543	0.734954	0.868452
CAP1	5853.14	0.649037	0.400722	1.61967	0.105304	0.311673
PPT1	2663.26	0.693582	0.407432	1.70232	0.0886945	0.283426
RLF	5365.87	0.705529	0.409018	1.72493	0.0845393	0.274618
ZMPSTE24	1076.15	0.841485	0.263707	3.19098	0.00141791	0.0207663
COL9A2	203.191	1.04514	0.811713	1.28758	0.197893	0.436618
SMAP2	2593.47	-0.164684	0.544997	-0.302175	0.762519	0.884646
ZFP69B	171.541	-0.673149	0.415469	-1.62022	0.105186	0.311609
ZFP69	155.148	-0.233303	0.436102	-0.534973	0.592669	0.782644
EXO5	313.75	0.0226648	0.319289	0.0709855	0.943409	0.975451
ZNF684	188.036	0.499545	0.388708	1.28514	0.198742	0.437432
RIMS3	511.373	-2.14869	0.368281	-5.83439	5.39893e-09	8.18552e-07
NFYC-AS1	234.304	-1.0463	0.365636	-2.8616	0.00421511	0.0442149
NFYC	626.768	-0.143686	0.338099	-0.424983	0.670849	0.830655
KCNQ4	22.0818	-2.47872	0.867288	-2.85802	0.00426295	0.0444374
CITED4	99.879	1.35354	0.867432	1.5604	0.118666	0.333112
CTPS1	1284.85	-0.21528	0.355419	-0.605707	0.544709	0.748285
SLFNL1-AS1	306.953	-0.975567	0.391636	-2.49101	0.0127382	0.0917064
SLFNL1	25.8897	-2.24937	0.809509	-2.77868	0.00545803	0.0520046
SCMH1	1304.44	-0.125811	0.264769	-0.475172	0.634665	0.810763
FOXO6	14.4181	-1.4939	0.806345	-1.85268	0.0639281	0.236573
HIVEP3	1368.32	-2.00821	0.47693	-4.2107	2.54578e-05	0.0009693
FOXJ3	3299.5	0.626032	0.284097	2.20359	0.0275533	0.145504
RIMKLA	61.3088	-0.331099	0.831644	-0.398126	0.690537	0.842767
ZMYND12	11.8503	0.237191	0.635012	0.373523	0.708759	0.852722
PPCS	673.654	0.308986	0.24196	1.27701	0.201597	0.440482
CCDC30	48.2244	-0.187573	0.585648	-0.320283	0.748754	0.876312
PPIH	428.497	0.464985	0.243074	1.91293	0.0557565	0.220563
YBX1	15948.4	1.19212	0.413224	2.88492	0.00391509	0.0420155
P3H1	747.345	0.0409359	0.337944	0.121132	0.903586	0.958148
C1orf50	239.368	0.293667	0.249774	1.17573	0.239702	0.485973
SVBP	382.431	0.000700783	0.371762	0.00188503	0.998496	0.998997
ERMAP	564.997	-0.558288	0.377673	-1.47823	0.139346	0.361786
ZNF691	144.941	-0.954828	0.49156	-1.94244	0.0520833	0.213021
SLC2A1	3082.9	0.232239	0.587641	0.395205	0.692691	0.844386
SLC2A1-AS1	18.6634	-0.171286	0.865377	-0.197933	0.843098	0.927935
EBNA1BP2	486.463	0.72837	0.328229	2.21909	0.0264803	0.142029
TIE1	62.6409	0.922445	0.827772	1.11437	0.26512	0.514956
MPL	22.9642	0.633744	0.899696	0.704398	0.481185	0.701736
CDC20	540.56	-0.0571859	0.71599	-0.0798697	0.936341	0.972841
ELOVL1	589.349	1.04686	0.344421	3.03947	0.00236993	0.0295402
MED8	424.889	0.513504	0.275783	1.86198	0.0626053	0.234395
SZT2	2690.7	-0.604089	0.377043	-1.60217	0.109117	0.317967
HYI	248.961	-0.906604	0.374353	-2.42179	0.0154442	0.103203
PTPRF	324.519	0.411657	0.736895	0.558638	0.576409	0.770811
KDM4A	2034.65	0.505226	0.288809	1.74934	0.0802315	0.266504
KDM4A-AS1	33.387	-0.683113	0.919699	-0.742758	0.457628	0.684917
ST3GAL3	287.812	-0.123524	0.351385	-0.351534	0.725188	0.861812
ARTN	14.9931	0.972902	0.628791	1.54726	0.121801	0.336971
IPO13	415.942	-0.11426	0.484718	-0.235724	0.813647	0.912842
DPH2	414.91	0.144192	0.368433	0.391364	0.695528	0.845985
ATP6V0B	2259.01	1.40991	0.44072	3.1991	0.00137858	0.0203963
B4GALT2	217.048	1.13283	0.513975	2.20405	0.0275209	0.145471
CCDC24	23.9294	0.0194885	0.590346	0.0330121	0.973665	0.987857
SLC6A9	96.5005	-1.13979	0.639002	-1.78371	0.0744705	0.25614
DMAP1	576.72	-0.401063	0.275775	-1.45431	0.14586	0.370826
ERI3	501.022	-0.0571366	0.308659	-0.185113	0.853141	0.933405
ERI3-IT1	23.2051	-1.32806	0.645793	-2.05648	0.0397361	0.181473
RNF220	4409.93	-0.0453707	0.430152	-0.105476	0.915998	0.963199
TMEM53	36.0038	-0.115353	0.408973	-0.282056	0.7779	0.893154
C1orf228	2372.16	-0.0939791	0.512592	-0.183341	0.854531	0.933929
KIF2C	757.094	-0.599685	0.591616	-1.01364	0.310755	0.559177
RPS8	31342.2	0.602504	0.455536	1.32263	0.185959	0.422993
SNORD55	41.9648	0.510011	0.843532	0.604614	0.545436	0.748288
SNORD46	40.4107	2.16938	0.784041	2.76693	0.00565877	0.0532339
BEST4	17.4367	-0.62235	0.604623	-1.02932	0.30333	0.552964
PLK3	793.668	-0.0333022	0.572231	-0.058197	0.953592	0.97949
TCTEX1D4	74.2081	-1.51369	0.757857	-1.99733	0.0457891	0.197457
BTBD19	45.0082	-1.19609	0.656287	-1.82252	0.0683768	0.244937
PTCH2	175.286	-0.296766	0.620396	-0.47835	0.632401	0.809655
EIF2B3	350.631	0.170577	0.4526	0.376882	0.706261	0.851449
HECTD3	487.885	0.152433	0.329788	0.462216	0.643926	0.816479
UROD	1418.48	0.547781	0.560762	0.976852	0.328643	0.57635
ZSWIM5	26.5578	-0.0812897	0.819127	-0.0992394	0.920948	0.9648
LINC01144	33.6525	-0.663658	0.44577	-1.48879	0.136543	0.357537
HPDL	44.9171	-0.102629	0.7207	-0.142402	0.886763	0.949049
MUTYH	276.79	-0.777538	0.277815	-2.79876	0.00512986	0.0497965
TOE1	618.907	-0.04153	0.308685	-0.134538	0.892977	0.952836
TESK2	322.639	0.130972	0.301935	0.433775	0.664452	0.828023
CCDC163P	44.4458	0.283777	0.499825	0.567752	0.570203	0.76657
MMACHC	132.834	-0.640043	0.486932	-1.31444	0.188698	0.425244
PRDX1	2953.83	1.12219	0.483494	2.32101	0.0202865	0.121584
AKR1A1	1297.58	0.513823	0.362617	1.41699	0.156487	0.385626
NASP	2707.25	0.0796559	0.314645	0.253161	0.800144	0.904585
CCDC17	87.8779	0.0130868	0.483457	0.0270692	0.978405	0.989977
GPBP1L1	5740.05	0.399779	0.205235	1.94791	0.0514263	0.211577
RPS15AP10	159.321	-0.504376	0.319616	-1.57807	0.114549	0.326441
TMEM69	319.118	-0.239015	0.306387	-0.780108	0.435327	0.6662
IPP	202.314	-1.8737	0.407135	-4.60216	4.18139e-06	0.000221556
MAST2	595.518	0.319467	0.457907	0.697668	0.485385	0.704873
PIK3R3	548.911	-1.96748	0.639143	-3.07832	0.00208174	0.0270149
POMGNT1	583.045	-0.492284	0.291472	-1.68896	0.0912273	0.287417
LURAP1	31.044	-1.62346	1.08632	-1.49446	0.135056	0.355285
RAD54L	415.771	-1.45839	0.632225	-2.30676	0.0210684	0.124132
LRRC41	988.73	-0.253055	0.288765	-0.876337	0.380847	0.623042
UQCRH	2173.53	0.717703	0.383447	1.87172	0.061246	0.231319
NSUN4	838.269	0.00535903	0.205415	0.0260888	0.979186	0.99031
FAAH	574.79	-0.0496146	0.597442	-0.0830451	0.933816	0.971517
MKNK1	864.394	-0.111774	0.370594	-0.301608	0.762951	0.884824
MOB3C	392.238	0.421909	0.332966	1.26712	0.205112	0.445036
ATPAF1	472.421	-0.488924	0.454298	-1.07622	0.281829	0.532309
EFCAB14	2761.85	0.0154813	0.201748	0.076736	0.938834	0.97333
PDZK1IP1	90.4816	-0.63028	0.9327	-0.675759	0.499194	0.716957
TAL1	1210.3	0.05876	0.92082	0.0638127	0.949119	0.977987
STIL	1127.53	-0.677365	0.382463	-1.77106	0.076551	0.259917
CMPK1	4563.58	0.53183	0.300008	1.77272	0.0762756	0.259497
FOXD2-AS1	221.417	-0.377109	0.37444	-1.00713	0.313873	0.562652
FOXD2	72.4326	-0.457905	0.693659	-0.660129	0.509171	0.723479
SPATA6	93.1634	0.638986	0.738491	0.865259	0.386897	0.629133
BEND5	270.36	0.399003	0.556116	0.717481	0.473077	0.695708
FAF1	1577.88	0.0482791	0.320405	0.150681	0.880227	0.94607
CDKN2C	669.944	-0.450775	0.710205	-0.63471	0.525617	0.733945
RNF11	5158.43	0.956833	0.519034	1.84349	0.065258	0.238977
TTC39A	21.9146	-0.13915	0.756136	-0.184028	0.853991	0.933817
EPS15	4814.76	0.589657	0.224683	2.6244	0.0086802	0.0710443
OSBPL9	2894.08	0.524067	0.293697	1.78438	0.0743625	0.255948
NRDC	3410.21	-0.204903	0.337783	-0.606612	0.544108	0.747653
RAB3B	59.4803	-2.0485	1.06691	-1.92002	0.0548551	0.218863
TXNDC12	919.861	0.41601	0.249622	1.66656	0.0956021	0.295822
KTI12	557.752	0.815062	0.339963	2.39751	0.0165071	0.107563
BTF3L4	2422.08	0.565345	0.248245	2.27736	0.0227646	0.129637
ZFYVE9	70.1661	-2.46712	0.726122	-3.39767	0.000679631	0.0122871
CC2D1B	925.545	-0.360698	0.286574	-1.25865	0.208155	0.449068
ORC1	940.736	0.428655	0.542165	0.790636	0.429156	0.66127
PRPF38A	1663.41	0.050436	0.176171	0.28629	0.774656	0.891836
ZCCHC11	4611.58	-0.441574	0.421186	-1.04841	0.294451	0.544557
GPX7	485.199	0.203247	0.544631	0.373183	0.709012	0.852722
FAM159A	24.2937	-1.30624	0.648484	-2.0143	0.0439778	0.192574
COA7	230.824	0.65913	0.426901	1.54399	0.122591	0.338058
ZYG11B	1766.96	0.258107	0.246066	1.04893	0.294208	0.544173
ECHDC2	63.0669	-2.72394	0.620433	-4.39039	1.13145e-05	0.0004988
SCP2	1462.56	0.130855	0.319962	0.408971	0.682561	0.838243
CPT2	265.613	0.165992	0.374023	0.443802	0.657186	0.824323
C1orf123	406.244	-0.251447	0.327392	-0.76803	0.442469	0.671709
MAGOH	437.769	0.30891	0.327221	0.944041	0.345148	0.591821
LRP8	1704.41	0.0192879	0.380809	0.0506497	0.959605	0.982042
NDC1	1206.6	0.0577362	0.398529	0.144873	0.884811	0.948147
YIPF1	383.741	0.266266	0.296887	0.89686	0.369794	0.613104
HSPB11	315.415	0.11816	0.303766	0.388984	0.697288	0.84709
LRRC42	292.711	0.244945	0.307012	0.797834	0.424967	0.658456
TMEM59	3916.29	0.856579	0.303978	2.8179	0.00483387	0.0477614
TCEANC2	515.652	-0.329905	0.423006	-0.779905	0.435447	0.6662
CYB5RL	171.023	0.333585	0.433549	0.769428	0.44164	0.671115
MRPL37	911.199	0.810932	0.344079	2.35682	0.0184322	0.115143
SSBP3	1382.84	0.195097	0.359228	0.543099	0.587061	0.779014
SSBP3-AS1	143.247	-1.90638	0.784138	-2.43118	0.0150498	0.1013
ACOT11	106.218	1.46125	0.503811	2.90038	0.00372709	0.0406502
MROH7	77.4476	1.74014	0.687203	2.5322	0.0113348	0.0843799
MROH7-TTC4	44.2165	0.569887	0.653017	0.872698	0.382828	0.624972
TTC4	336.094	-0.091652	0.247312	-0.370593	0.71094	0.853596
PARS2	48.5083	-0.0469605	0.685059	-0.0685496	0.945348	0.976532
DHCR24	771.265	-3.94832	0.759031	-5.20179	1.97382e-07	1.75727e-05
USP24	9348.03	0.405836	0.238702	1.70018	0.0890967	0.284315
LOC100507634	41.0829	-0.254206	0.687089	-0.369975	0.711401	0.853804
PLPP3	74.7241	-0.6749	0.879115	-0.767704	0.442663	0.671878
OMA1	974.302	0.058761	0.458189	0.128246	0.897954	0.955382
MYSM1	4369.16	0.0896787	0.298936	0.299993	0.764182	0.885503
JUN	11239.7	-0.801042	0.742972	-1.07816	0.280963	0.531323
FGGY	349.286	-0.681622	0.372039	-1.83213	0.0669326	0.241916
HOOK1	114.641	-0.390836	0.687257	-0.568689	0.569567	0.76657
NFIA	339.897	-1.65318	0.720999	-2.2929	0.0218539	0.126617
TM2D1	334.183	-0.00146529	0.316663	-0.00462729	0.996308	0.998001
INADL	218.469	-1.06192	0.678074	-1.56609	0.117328	0.330327
L1TD1	89.4903	-3.78851	1.14278	-3.31518	0.000915848	0.0152605
USP1	3956.64	-0.760559	0.455128	-1.67109	0.0947045	0.294481
DOCK7	1518.79	0.422004	0.35622	1.18467	0.236146	0.481643
ATG4C	373.65	0.379146	0.432123	0.877405	0.380267	0.622451
ALG6	469.513	-0.56301	0.428188	-1.31487	0.188555	0.425244
ITGB3BP	360.983	-0.157728	0.373309	-0.422513	0.672651	0.832131
EFCAB7	291.678	-0.523953	0.322873	-1.62279	0.104635	0.310917
DLEU2L	91.7029	-1.07602	0.411523	-2.61473	0.00892979	0.0725807
PGM1	618.788	-0.374445	0.436329	-0.858172	0.390797	0.631624
ROR1	15.965	-1.15927	0.949918	-1.22039	0.222316	0.465826
CACHD1	248.153	0.396767	0.734723	0.540023	0.589181	0.780326
RAVER2	833.91	0.61604	0.57152	1.0779	0.28108	0.531446
JAK1	7447.91	-0.0452645	0.289944	-0.156115	0.875943	0.943868
AK4	631.644	-0.405026	0.715449	-0.566115	0.571315	0.767086
DNAJC6	532.234	0.514629	0.535235	0.9615	0.336301	0.584139
LEPROT	2633.74	1.1087	0.285995	3.87663	0.000105914	0.00294883
LEPR	684.947	1.35871	0.534674	2.5412	0.0110473	0.0831291
PDE4B	3813.56	1.16792	0.748641	1.56006	0.118746	0.33319
SGIP1	77.1188	0.672737	0.743976	0.904246	0.365865	0.609931
TCTEX1D1	346.107	2.54468	0.818507	3.10892	0.0018777	0.0250682
WDR78	90.4579	-1.24309	0.461432	-2.69398	0.00706051	0.0621723
MIER1	5115.6	0.0684884	0.322296	0.212502	0.831716	0.921234
SLC35D1	1896.09	0.395603	0.2938	1.3465	0.178141	0.413153
IL12RB2	219.585	-0.750828	0.759554	-0.988513	0.322902	0.571365
SERBP1	8449.12	0.38055	0.251442	1.51347	0.13016	0.348597
GADD45A	2227.43	2.43728	0.766443	3.17999	0.00147278	0.0213164
GNG12	33.0674	-1.52216	1.04581	-1.45549	0.145533	0.370423
WLS	28.2072	-2.09066	0.816844	-2.55943	0.0104844	0.0803139
DEPDC1	399.485	-0.337277	0.892012	-0.378108	0.70535	0.851186
LRRC40	1391.86	0.646032	0.269929	2.39334	0.0166958	0.108378
SRSF11	10140.5	0.197667	0.397448	0.497341	0.618948	0.8003
ANKRD13C	1301.49	0.284804	0.235155	1.21113	0.225844	0.469981
HHLA3	23.8892	-0.0858425	0.501766	-0.171081	0.86416	0.938503
CTH	53.2981	0.991778	0.616376	1.60905	0.107606	0.315423
PTGER3	228.598	-3.53342	0.861498	-4.10148	4.10508e-05	0.00141104
ZRANB2	4648.07	-0.133514	0.306859	-0.435098	0.663491	0.827567
NEGR1	1385.35	2.56958	0.877882	2.92702	0.0034223	0.0382403
FPGT-TNNI3K	74.0531	3.23702	0.627116	5.16175	2.44651e-07	2.14077e-05
FPGT	463.616	1.36342	0.492422	2.7688	0.00562639	0.0530196
CRYZ	238.822	-0.339337	0.463217	-0.732567	0.463822	0.689324
TYW3	1102.58	0.865321	0.297644	2.90724	0.00364633	0.0399973
SLC44A5	85.1908	0.108346	1.32359	0.0818573	0.93476	0.971768
ACADM	1064.77	0.103206	0.370178	0.278801	0.780398	0.894412
DLSTP1	87.1612	-1.89783	0.815547	-2.32707	0.0199617	0.120534
RABGGTB	1407.73	0.668592	0.379637	1.76114	0.078215	0.263059
MSH4	27.182	-0.418764	0.575547	-0.727592	0.466863	0.691164
ST6GALNAC3	33.7515	-0.18261	0.883562	-0.206674	0.836264	0.923735
PIGK	878.436	1.19254	0.389073	3.06508	0.00217608	0.027815
AK5	55.6493	0.699616	0.578237	1.20991	0.226313	0.470604
ZZZ3	2860.16	0.400441	0.209483	1.91157	0.0559318	0.220971
USP33	3152.36	0.0620517	0.150096	0.413412	0.679305	0.836526
FAM73A	847.939	0.12897	0.26459	0.487433	0.625951	0.80544
NEXN	142.26	-0.89444	0.526693	-1.69822	0.0894667	0.285002
FUBP1	5696.36	0.0429136	0.269174	0.159427	0.873332	0.942891
DNAJB4	976.283	0.298466	0.578899	0.515575	0.606151	0.791506
IFI44L	2790.34	-1.18692	0.874081	-1.35791	0.174492	0.408373
IFI44	2994.79	0.61925	0.644789	0.960391	0.336858	0.584511
ADGRL2	21.3641	-1.01457	1.14362	-0.887159	0.374993	0.617958
PRKACB	5616.1	1.13377	0.380725	2.97793	0.00290201	0.0342572
SAMD13	121.862	0.953196	0.526556	1.81025	0.0702574	0.248378
RPF1	1667.05	0.58711	0.379917	1.54537	0.122258	0.337565
GNG5	898.383	0.667026	0.333496	2.0001	0.0454891	0.19644
SPATA1	29.8789	-1.06064	0.670277	-1.58238	0.113562	0.324982
CTBS	801.505	0.492535	0.252137	1.95344	0.0507675	0.209946
SSX2IP	1236.83	0.761801	0.248645	3.06381	0.00218541	0.0279109
LPAR3	58.3872	-1.94914	1.05438	-1.84861	0.0645136	0.237787
MCOLN2	46.401	-0.803545	0.544662	-1.47531	0.140129	0.362286
SYDE2	40.7275	0.227197	0.892748	0.254492	0.799115	0.90389
C1orf52	993.362	0.382092	0.310874	1.22909	0.219038	0.461873
BCL10	1011.49	0.30995	0.328361	0.943929	0.345206	0.591821
DDAH1	26.7946	-1.38734	0.838758	-1.65404	0.09812	0.299544
CYR61	32.7117	-1.23465	1.07326	-1.15038	0.249988	0.496764
ZNHIT6	1107.94	0.156806	0.240857	0.651032	0.515026	0.727123
COL24A1	4825.62	1.78822	0.625674	2.85806	0.00426235	0.0444374
ODF2L	1570.03	-0.682711	0.317201	-2.1523	0.031374	0.157134
SH3GLB1	5387.59	0.759439	0.330034	2.30109	0.0213864	0.125304
2023-09-15	2388.07	0.370551	0.313984	1.18016	0.237937	0.483932
HS2ST1	1363.28	0.491268	0.320866	1.53107	0.125752	0.342757
LINC01140	26.7351	1.16616	0.77503	1.50467	0.132409	0.351278
LMO4	430.172	0.0152188	0.674187	0.0225735	0.98199	0.992228
PKN2	3507.16	-0.072547	0.27172	-0.266992	0.789476	0.899698
GTF2B	1701.45	0.773964	0.419149	1.84651	0.0648176	0.238227
CCBL2	507.927	-0.356067	0.284467	-1.2517	0.21068	0.452348
RBMXL1	1732.58	0.68114	0.291549	2.33628	0.0194767	0.118823
GBP3	826.762	-0.0212644	0.323061	-0.0658216	0.94752	0.97721
GBP1	648.607	-1.64025	0.528173	-3.10551	0.00189951	0.0252713
GBP2	2530.89	-0.101906	0.595283	-0.17119	0.864074	0.938503
GBP7	12.7657	0.512269	0.858421	0.596758	0.550669	0.752136
GBP4	2710.76	0.742346	0.518525	1.43165	0.152245	0.380309
GBP5	2815.14	0.273638	0.673009	0.406589	0.68431	0.838924
GBP6	14.1547	-1.72584	0.810197	-2.13015	0.0331589	0.162692
LRRC8B	1501.84	0.780539	0.348187	2.24172	0.0249794	0.137002
FLJ27354	27.3176	-0.15761	0.386539	-0.407748	0.683459	0.838606
LRRC8C	1803.2	1.4314	0.394758	3.62601	0.000287833	0.00636935
LRRC8D	1392.07	0.524795	0.263928	1.9884	0.0467675	0.200211
GEMIN8P4	42.2117	-0.268076	0.600977	-0.446067	0.655549	0.823699
ZNF326	7020.51	0.216893	0.391976	0.553331	0.580037	0.773714
ZNF644	7979.19	0.566956	0.381661	1.4855	0.137412	0.359139
CDC7	730.542	-0.34931	0.45029	-0.775746	0.437899	0.66795
TGFBR3	227.437	0.255941	0.51211	0.499778	0.617232	0.799324
BTBD8	62.865	-0.821641	0.755269	-1.08788	0.276649	0.52782
KIAA1107	243.181	-0.886859	0.613153	-1.44639	0.148068	0.374137
GLMN	344.003	-6.408e-05	0.356744	-0.000179625	0.999857	0.999922
RPAP2	1212.42	0.21991	0.254235	0.864988	0.387045	0.629175
GFI1	1584.18	-0.0444884	0.615519	-0.0722778	0.942381	0.975132
EVI5	164.342	-1.0053	0.644422	-1.56001	0.118759	0.33319
RPL5	24809.2	0.656798	0.445936	1.47285	0.140791	0.363563
FAM69A	366.067	-0.418082	0.968396	-0.431726	0.665941	0.828833
SNORD21	27.9449	2.04979	0.878627	2.33295	0.0196508	0.11941
SNORA66	79.6654	-1.05693	0.713152	-1.48206	0.138325	0.360552
MTF2	3362.06	-0.0437092	0.266306	-0.164132	0.869627	0.940903
TMED5	3846.15	0.404173	0.292948	1.37967	0.167687	0.398912
CCDC18	1075.56	-0.873265	0.364441	-2.39618	0.0165669	0.107724
CCDC18-AS1	1349.09	-0.247638	0.459995	-0.538348	0.590337	0.781211
DR1	3628.98	0.135383	0.317028	0.427037	0.669352	0.830279
FNBP1L	601.877	2.16563	0.86483	2.50411	0.0122762	0.089351
BCAR3	26.16	-0.43678	0.573765	-0.761253	0.446506	0.675294
DNTTIP2	3360.01	0.465363	0.355907	1.30754	0.191029	0.428541
GCLM	700.079	0.545674	0.575586	0.948032	0.343113	0.589818
ABCA4	142.206	-6.18356	0.978369	-6.32027	2.61104e-10	6.44884e-08
ARHGAP29	571.381	-5.93853	1.03547	-5.73512	9.74414e-09	1.32046e-06
ABCD3	1062.28	0.0744551	0.421629	0.176589	0.859831	0.936391
F3	52.0676	1.54366	0.859818	1.79533	0.0726013	0.253337
CNN3	103.12	-2.22916	0.798956	-2.79009	0.00526933	0.0507799
ALG14	56.9983	-0.153769	0.444305	-0.346089	0.729276	0.864929
TMEM56	1053.6	0.665656	1.20725	0.551383	0.581371	0.774535
TMEM56-RWDD3	75.0828	-0.669409	0.474144	-1.41183	0.158001	0.387548
RWDD3	276.886	0.0125073	0.345758	0.0361737	0.971144	0.986476
PTBP2	3908.87	0.742712	0.486515	1.5266	0.126862	0.344208
DPYD	3492.96	-0.951785	0.536223	-1.77498	0.0759013	0.258744
FRRS1	361.87	2.2024	0.453252	4.85909	1.17926e-06	7.52415e-05
AGL	1521.18	0.0180665	0.280307	0.0644525	0.94861	0.977604
SLC35A3	1805.63	0.305735	0.336457	0.908689	0.363514	0.607962
MFSD14A	3211.2	0.498446	0.385926	1.29156	0.196509	0.435557
SASS6	772.06	-0.219258	0.295363	-0.742333	0.457885	0.684917
TRMT13	545.223	-0.476754	0.44887	-1.06212	0.288181	0.538656
LRRC39	74.541	-1.12687	0.419524	-2.68607	0.00722972	0.0631196
DBT	679.122	-0.454794	0.393867	-1.15469	0.248217	0.494593
RTCA-AS1	66.2542	-0.355817	0.51903	-0.685542	0.493002	0.711866
RTCA	1091.65	0.562904	0.218984	2.57052	0.0101545	0.0785476
CDC14A	1617.75	0.467929	0.348783	1.3416	0.179724	0.414683
VCAM1	200.124	-0.13514	1.17277	-0.115232	0.908261	0.960191
EXTL2	292.058	-1.15354	0.520451	-2.21642	0.0266624	0.142654
SLC30A7	2484.31	-0.128061	0.204029	-0.627661	0.530226	0.736987
DPH5	382.368	-0.245563	0.392427	-0.625755	0.531476	0.738051
LOC102606465	112.896	-1.93361	0.507735	-3.8083	0.000139927	0.0036753
S1PR1	1045.94	-2.62965	0.605491	-4.34301	1.40545e-05	0.000599489
COL11A1	13.726	0.842757	1.17893	0.71485	0.474702	0.696881
RNPC3	1145.97	-0.460812	0.366953	-1.25578	0.209197	0.450236
AMY2B	826.722	-0.522426	0.373377	-1.39919	0.161756	0.391774
ACTG1P4	61.9881	-1.34636	0.496165	-2.71353	0.00665705	0.0597185
PRMT6	343.264	-0.450118	0.341547	-1.31788	0.187544	0.424519
VAV3	3544.61	0.419124	0.330799	1.26701	0.205153	0.445036
SLC25A24	967.335	0.461387	0.492611	0.936614	0.348957	0.594524
FAM102B	2178.06	0.0208984	0.253758	0.0823557	0.934364	0.971693
HENMT1	1090.02	0.702393	0.457502	1.53528	0.124715	0.341029
PRPF38B	2529.92	-0.0168599	0.260518	-0.0647168	0.948399	0.977508
FNDC7	14.1595	-0.829289	0.668355	-1.24079	0.214683	0.457223
STXBP3	1589.21	0.668631	0.223059	2.99756	0.00272153	0.0326181
GPSM2	768.438	-0.0994414	0.40996	-0.242563	0.808344	0.90949
CLCC1	768.441	0.581416	0.441319	1.31745	0.187688	0.424663
WDR47	1202.28	1.16637	0.331006	3.52372	0.000425527	0.00859643
TAF13	246.857	1.47283	0.527279	2.79327	0.0052178	0.0504421
TMEM167B	2822.95	0.936731	0.409703	2.28637	0.0222329	0.127942
SCARNA2	15255.7	1.24882	0.4229	2.95299	0.00314716	0.0360452
KIAA1324	40.8058	-1.2541	0.657607	-1.90707	0.0565121	0.221621
SARS	1443.78	-0.0286244	0.225197	-0.127108	0.898855	0.955382
CELSR2	154.807	-2.40388	0.624372	-3.85008	0.000118078	0.00325203
PSRC1	112.388	-1.79652	0.61586	-2.91709	0.00353315	0.0391484
SORT1	580.008	-2.8131	0.651419	-4.31842	1.57152e-05	0.000657504
PSMA5	1093.61	-0.122825	0.361028	-0.340208	0.7337	0.867445
ATXN7L2	226.341	-0.268429	0.368131	-0.729167	0.4659	0.690574
CYB561D1	578.517	0.048021	0.233194	0.205927	0.836848	0.923954
AMIGO1	68.9736	-1.30927	0.479305	-2.7316	0.00630283	0.0573472
GNAI3	3383.97	0.551483	0.307689	1.79234	0.0730791	0.253964
AMPD2	2256.2	0.441657	0.328182	1.34577	0.178377	0.413308
GSTM4	191.867	-0.982832	0.514585	-1.90995	0.0561397	0.221109
GSTM2	265.617	-0.868261	0.522422	-1.66199	0.0965146	0.297054
GSTM1	254.199	-1.20507	1.43161	-0.841758	0.399923	0.637674
GSTM3	89.371	-2.77428	0.714794	-3.88123	0.000103928	0.00290942
CSF1	564.291	0.970607	0.842958	1.15143	0.249555	0.496465
AHCYL1	1390.93	0.315178	0.22496	1.40104	0.161203	0.391132
STRIP1	1714.96	0.304359	0.258521	1.17731	0.239073	0.48534
KCNC4	229.945	-0.0567515	0.408391	-0.138964	0.889479	0.950893
LOC440600	7.96	-1.62277	0.785745	-2.06526	0.038898	0.17973
RBM15	4608.67	-0.242145	0.267966	-0.903639	0.366187	0.610092
SLC16A4	126.746	-2.59857	1.04076	-2.49681	0.0125317	0.0905606
LAMTOR5	795.444	0.72982	0.409858	1.78067	0.0749669	0.256759
KCNA3	2947.92	-2.49134	0.485021	-5.13657	2.79797e-07	2.31596e-05
CD53	3389.93	0.0958616	0.443579	0.21611	0.828902	0.919727
LRIF1	686.364	-0.412653	0.474381	-0.869878	0.384367	0.626417
DRAM2	751.82	0.00301471	0.255984	0.011777	0.990604	0.996384
CEPT1	900.622	-0.104375	0.290246	-0.359609	0.71914	0.857957
DENND2D	1277.97	-2.62045	0.583002	-4.49476	6.96499e-06	0.000340001
CHI3L2	5790.94	-8.54411	0.844862	-10.113	4.83694e-24	7.4068e-20
OVGP1	181.454	0.485507	0.578585	0.839128	0.401397	0.63844
WDR77	663.807	-0.104222	0.234251	-0.444914	0.656382	0.823821
ATP5F1	2579.92	0.32911	0.329714	0.998168	0.318198	0.566512
C1orf162	270.955	-0.0951671	0.422864	-0.225054	0.821937	0.91697
ADORA3	49.4495	0.895396	0.646877	1.38418	0.166302	0.39716
LINC01160	9.76944	1.34152	0.694361	1.93202	0.0533568	0.215297
RAP1A	1415.51	0.378952	0.358196	1.05795	0.290079	0.54065
FAM212B	290.243	0.263738	0.598295	0.440816	0.659346	0.825625
LOC101928718	10.7834	0.499239	0.852215	0.585813	0.558001	0.757368
DDX20	1207.95	0.293418	0.292075	1.0046	0.31509	0.563403
CTTNBP2NL	163.221	0.903562	0.658889	1.37134	0.170268	0.402177
WNT2B	19.7868	0.446469	0.776708	0.574822	0.565411	0.763117
ST7L	360.546	-0.236509	0.355964	-0.664418	0.506423	0.721449
CAPZA1	6089.97	0.589405	0.281558	2.09337	0.0363161	0.172117
MOV10	1816.78	-0.362289	0.244027	-1.48463	0.137643	0.359374
RHOC	677.658	-0.951738	0.545039	-1.74618	0.0807791	0.267511
SLC16A1	1360.58	-0.385435	0.570502	-0.675607	0.49929	0.716957
SLC16A1-AS1	118.168	-2.28041	0.580585	-3.92779	8.57314e-05	0.00250535
LRIG2	1121.02	-0.44476	0.291397	-1.52631	0.126934	0.344329
MAGI3	133.987	-0.944535	0.859654	-1.09874	0.271882	0.523229
PHTF1	857.202	1.8981	0.462164	4.10699	4.00846e-05	0.00139187
RSBN1	2245.75	0.145201	0.219273	0.66219	0.507849	0.722137
PTPN22	1608.73	-0.00189931	0.396942	-0.00478486	0.996182	0.998001
BCL2L15	89.1645	-0.446316	0.431879	-1.03343	0.301403	0.551433
AP4B1	1036.85	0.214119	0.298613	0.717044	0.473347	0.695821
DCLRE1B	344.659	0.4869	0.371011	1.31236	0.189398	0.426383
HIPK1-AS1	92.8917	0.00378359	0.652622	0.00579752	0.995374	0.997877
HIPK1	12482.4	0.288536	0.30656	0.941206	0.346599	0.592882
OLFML3	34.4917	0.712509	0.739162	0.963941	0.335075	0.582948
TRIM33	4936.24	-0.0681731	0.209194	-0.325884	0.744512	0.873875
BCAS2	1017.34	0.49557	0.453157	1.09359	0.274133	0.525644
DENND2C	17.3389	-0.177659	0.75468	-0.235409	0.813891	0.912953
NRAS	5302.34	0.632093	0.381368	1.65744	0.0974315	0.298629
CSDE1	26979	0.719586	0.394782	1.82274	0.0683425	0.244917
SIKE1	2144.42	0.0506162	0.207968	0.243385	0.807707	0.909042
TSPAN2	412.846	-0.615317	0.694601	-0.885857	0.375694	0.618581
VANGL1	639.667	-1.78997	0.669873	-2.6721	0.0075379	0.0651275
SLC22A15	123.3	-3.91918	0.766083	-5.11587	3.12293e-07	2.4907e-05
ATP1A1	3481.22	0.641198	0.287484	2.23037	0.0257226	0.139191
ATP1A1-AS1	52.6459	-1.49545	0.661117	-2.26201	0.0236966	0.132544
CD58	721.347	0.574744	0.338489	1.69797	0.0895138	0.285033
IGSF3	49.7772	-1.28171	0.83009	-1.54406	0.122574	0.338058
CD2	549.442	-3.2781	0.732528	-4.47505	7.63944e-06	0.000370135
PTGFRN	127.376	0.467475	0.828361	0.564337	0.572525	0.768098
CD101	58.1008	-0.451691	0.547331	-0.825261	0.409223	0.644605
TTF2	1631.58	-0.549319	0.334286	-1.64326	0.100329	0.303564
TRIM45	180.128	0.364939	0.47203	0.773127	0.439447	0.669262
MAN1A2	4662.93	0.370717	0.326345	1.13597	0.25597	0.503878
FAM46C	10094.4	0.147299	0.57897	0.254415	0.799175	0.90389
GDAP2	1430.52	0.0874447	0.232718	0.375753	0.7071	0.851715
WDR3	819.154	0.236561	0.419371	0.564086	0.572696	0.76826
TBX15	27.2009	2.04766	0.910195	2.24969	0.0244685	0.135315
WARS2	293.893	0.268179	0.268111	1.00025	0.317188	0.565634
LOC101929147	262.764	-0.621936	0.502049	-1.2388	0.215421	0.458159
ZNF697	50.3943	-0.574822	0.863107	-0.665991	0.505417	0.721191
PHGDH	657.886	-0.538633	0.621358	-0.866865	0.386016	0.628035
NOTCH2	4990.79	0.0263382	0.512774	0.0513642	0.959035	0.982004
FAM72B	212.692	-0.433704	0.567523	-0.764205	0.444745	0.673378
FCGR1B	134.4	1.17259	0.910795	1.28744	0.197941	0.436618
SRGAP2-AS1	41.655	-0.743998	1.10676	-0.67223	0.501437	0.718547
SRGAP2B	958.715	0.0887343	0.340991	0.260225	0.79469	0.902618
SRGAP2D	125.565	-0.539672	0.702976	-0.767695	0.442668	0.671878
EMBP1	163.234	-0.279042	0.515714	-0.541079	0.588453	0.7799
ANKRD20A12P	17.359	-1.49694	0.904791	-1.65446	0.0980349	0.299403
LOC102723769	23.9198	-1.79038	1.08347	-1.65245	0.0984431	0.2999
LINC01138	79.2913	-1.53248	0.701784	-2.18369	0.0289853	0.149697
FAM72C	194.989	0.0755358	0.960631	0.0786314	0.937326	0.972907
NBPF20	2137.99	-0.227533	0.386359	-0.588915	0.555918	0.756026
LINC00623	32.5452	-0.886605	0.720514	-1.23052	0.218503	0.461535
LINC00869	159.228	-1.26732	0.607313	-2.08676	0.0369096	0.17396
PFN1P2	138.532	-2.32276	1.0579	-2.19563	0.0281183	0.146854
NBPF9	1521.09	-0.235469	0.307374	-0.766067	0.443637	0.67281
NBPF8	3775.99	-1.11004	0.552374	-2.00959	0.0444749	0.193874
PDE4DIP	1941.79	-0.156609	0.388127	-0.403499	0.686581	0.84009
SEC22B	1333.72	-0.111318	0.227026	-0.490331	0.623899	0.803761
NOTCH2NL	3611.23	-0.576709	0.449328	-1.28349	0.19932	0.438091
NBPF25P	1029.14	-0.480663	0.390956	-1.22946	0.218901	0.461834
NBPF10	3431.71	-0.286145	0.339693	-0.842362	0.399585	0.63747
TXNIP	34496.6	0.764245	0.469806	1.62672	0.103796	0.309781
POLR3GL	374.678	-0.295194	0.390614	-0.755718	0.449818	0.678093
ANKRD34A	35.503	-1.2547	0.600833	-2.08826	0.0367741	0.173535
LIX1L	926.074	-0.17751	0.356042	-0.498566	0.618085	0.799777
RBM8A	3299.98	-0.0313435	0.231849	-0.135189	0.892462	0.952486
GNRHR2	26.5212	-1.30371	0.67239	-1.93892	0.0525113	0.213972
PEX11B	412.595	-0.102989	0.213897	-0.48149	0.630168	0.808323
ITGA10	68.6916	-2.63004	0.706222	-3.7241	0.000196014	0.00478521
ANKRD35	19.8538	1.18855	0.64007	1.8569	0.0633253	0.235478
PIAS3	382.153	-0.103262	0.239435	-0.431275	0.666268	0.829092
NUDT17	42.8758	-0.228839	0.402347	-0.568761	0.569519	0.76657
POLR3C	892.381	0.305731	0.140287	2.17932	0.029308	0.150638
RNF115	849.383	0.420804	0.191145	2.20149	0.0277012	0.145769
CD160	48.8992	-0.649263	0.72851	-0.891222	0.37281	0.615999
PDZK1	32.4652	-1.32605	0.662699	-2.00098	0.0453948	0.196143
GPR89A	556.428	0.0765409	0.251042	0.304893	0.760448	0.883662
NBPF11	1648.46	-0.635114	0.35709	-1.77858	0.0753079	0.257565
NBPF12	1322.35	-1.04582	0.393279	-2.65924	0.00783176	0.0665895
LOC728989	11.6414	-1.48076	0.673816	-2.19758	0.0279792	0.146469
PRKAB2	1993.33	1.86833	0.459756	4.06374	4.82927e-05	0.0015859
PDIA3P1	230.026	0.955753	0.318469	3.00108	0.00269021	0.03231
FMO5	246.553	0.116105	0.482957	0.240404	0.810017	0.909903
CHD1L	2617.12	0.436125	0.305238	1.4288	0.153062	0.381584
BCL9	389.236	-0.684324	0.720286	-0.950073	0.342075	0.588765
ACP6	107.946	-0.703925	0.660695	-1.06543	0.286681	0.537236
GPR89B	422.302	-0.577513	0.316382	-1.82537	0.0679459	0.243895
RNVU1-19	187.194	-0.732062	0.854535	-0.856679	0.391622	0.631919
NBPF14	649.648	0.0492836	0.408021	0.120787	0.90386	0.958239
NBPF15	838.452	-0.45679	0.387964	-1.1774	0.239035	0.485328
LOC645166	27.1937	-0.511252	0.521929	-0.979543	0.327312	0.574917
LOC388692	25.2606	-0.281932	1.146	-0.246014	0.805671	0.907751
LOC103091866	13.1898	-0.771218	0.623237	-1.23744	0.215924	0.458701
RNVU1-20	76.5219	-0.654047	0.677968	-0.964718	0.334686	0.582723
HIST2H2BF	3212.12	-0.367598	0.81481	-0.451145	0.651885	0.821522
FCGR1A	301.951	1.08451	0.82506	1.31447	0.188689	0.425244
HIST2H3D	699.785	0.233006	0.908058	0.256598	0.797489	0.903518
HIST2H4A	3086.91	-0.309196	0.735556	-0.420357	0.674224	0.832546
HIST2H4B	3086.91	-0.309196	0.735556	-0.420357	0.674224	0.832546
HIST2H3C	2468.22	0.569109	0.786893	0.723235	0.469536	0.693346
HIST2H3A	2468.22	0.569109	0.786893	0.723235	0.469536	0.693346
HIST2H2AA4	5898.89	0.897606	0.563202	1.59375	0.110991	0.320961
HIST2H2AA3	5898.89	0.897606	0.563202	1.59375	0.110991	0.320961
HIST2H2BC	89.4269	-0.0873715	0.43712	-0.19988	0.841574	0.927058
HIST2H2BE	6620.89	-0.041298	0.574173	-0.0719261	0.942661	0.975138
HIST2H2AC	5047.45	0.0860875	0.624353	0.137883	0.890333	0.951474
HIST2H2AB	1196.57	-0.731941	0.539777	-1.35601	0.175097	0.409361
BOLA1	83.1814	-0.897112	0.41194	-2.17777	0.029423	0.151065
SV2A	1067.22	0.619501	0.480416	1.28951	0.19722	0.436239
SF3B4	722.098	0.257172	0.238058	1.08029	0.280012	0.530539
MTMR11	54.0319	-2.43189	0.780405	-3.11618	0.00183208	0.024651
OTUD7B	112.552	-1.1608	0.55366	-2.0966	0.0360291	0.171233
VPS45	525.721	-0.800059	0.527789	-1.51587	0.129552	0.348012
PLEKHO1	2651.69	0.539642	0.404394	1.33445	0.182058	0.417843
LOC105371433	11.2639	0.875911	0.993489	0.881651	0.377965	0.620408
ANP32E	3165.52	-0.0229684	0.325386	-0.0705884	0.943725	0.975646
APH1A	1937.59	0.282694	0.37676	0.750329	0.453057	0.681197
C1orf54	53.0123	0.496055	0.745923	0.665022	0.506037	0.721238
CIART	8.86096	-0.366773	0.717479	-0.511197	0.609213	0.793717
MRPS21	587.323	-0.526181	0.399224	-1.31801	0.1875	0.424516
PRPF3	2259.86	-0.302832	0.265188	-1.14195	0.253474	0.500951
RPRD2	2116.04	0.340255	0.24431	1.39272	0.163705	0.393791
TARS2	412.254	0.262141	0.221942	1.18112	0.237555	0.483605
ECM1	50.8529	0.95221	0.596406	1.59658	0.11036	0.320124
ADAMTSL4	115.857	0.128089	0.577558	0.221778	0.824487	0.918342
ADAMTSL4-AS1	119.865	-0.667118	0.518266	-1.28721	0.19802	0.436618
MCL1	25906.3	0.515939	0.416648	1.23831	0.215602	0.458353
ENSA	3399.64	0.133852	0.20106	0.665729	0.505584	0.721191
GOLPH3L	381.292	-0.367486	0.437955	-0.839096	0.401416	0.63844
HORMAD1	15.0083	-0.95812	0.503318	-1.90361	0.0569612	0.222508
CTSS	4999.4	-0.263327	0.43814	-0.601011	0.547832	0.749549
CTSK	249.957	-0.17058	0.373919	-0.456195	0.64825	0.819089
ARNT	1508.86	0.0410795	0.234242	0.175372	0.860787	0.936966
SETDB1	1575.23	-0.353096	0.249992	-1.41243	0.157825	0.387427
CERS2	2630.37	0.808211	0.279679	2.88979	0.00385505	0.0415136
FAM63A	408.368	-0.0162811	0.488415	-0.0333346	0.973408	0.987785
PRUNE	374.285	-0.198713	0.239556	-0.829505	0.406819	0.642626
BNIPL	18.686	-0.957533	0.706185	-1.35592	0.175124	0.409361
C1orf56	49.0205	-1.3958	0.70283	-1.98597	0.0470368	0.200801
CDC42SE1	4998.71	-0.109144	0.337858	-0.323047	0.74666	0.874798
MLLT11	372.547	-1.22204	0.454029	-2.69154	0.0071122	0.0624203
GABPB2	382.151	-0.808988	0.345654	-2.34046	0.0192602	0.118162
SEMA6C	85.3395	-0.763689	0.489978	-1.55862	0.119087	0.333613
TNFAIP8L2	144.589	0.407565	0.695048	0.586384	0.557618	0.756986
TNFAIP8L2-SCNM1	43.0072	0.309068	0.72099	0.428672	0.668162	0.829725
LYSMD1	84.3354	-1.87177	0.522398	-3.58303	0.000339632	0.00730447
SCNM1	435.857	0.852534	0.358852	2.37573	0.0175144	0.11168
TMOD4	18.0904	-0.869346	0.521519	-1.66695	0.0955242	0.295747
VPS72	438.95	-0.11998	0.363822	-0.329776	0.741569	0.872435
PIP5K1A	1635.69	0.0201385	0.279026	0.0721743	0.942463	0.975132
PSMD4	1301.83	0.26373	0.27367	0.963679	0.335207	0.582967
ZNF687	1784.99	0.541238	0.365293	1.48165	0.138433	0.360552
PI4KB	2399.01	0.461822	0.24399	1.89279	0.0583857	0.225469
RFX5	2394.34	-0.230312	0.28001	-0.822514	0.410784	0.646158
GBAT2	43.9696	-0.189846	0.415348	-0.457076	0.647616	0.818906
SELENBP1	990.234	-0.00755903	0.979675	-0.00771585	0.993844	0.997382
PSMB4	2010.95	0.23657	0.309472	0.764434	0.444609	0.673378
POGZ	3078.93	-0.176785	0.259596	-0.681001	0.495871	0.71419
CGN	39.1585	-2.67746	0.819674	-3.26649	0.00108888	0.0173688
TUFT1	74.2525	0.281502	0.836413	0.336559	0.736449	0.86942
SNX27	1328.39	0.133114	0.413904	0.321606	0.747751	0.875551
CELF3	23.3553	-0.321137	1.19812	-0.268035	0.788673	0.899318
MRPL9	829.987	0.430095	0.331205	1.29858	0.19409	0.432179
TDRKH	136.751	-1.76563	0.589102	-2.99716	0.00272506	0.0326261
RORC	260.518	-5.63399	0.868027	-6.49058	8.55093e-11	2.51809e-08
THEM4	243.183	0.0429772	0.646516	0.066475	0.947	0.977105
S100A10	850.826	-0.206624	0.778305	-0.26548	0.79064	0.900555
S100A11	478.849	-0.167959	0.677231	-0.248009	0.804128	0.907013
TCHH	33.141	-0.142009	1.03538	-0.137156	0.890907	0.95188
FLG-AS1	60.6349	-0.831898	0.752482	-1.10554	0.268926	0.519564
S100A9	15370.1	-0.688723	1.22642	-0.56157	0.574409	0.769548
S100A12	543.74	-2.82759	1.03103	-2.74249	0.00609756	0.0562143
S100A8	7126.92	-1.12766	1.21683	-0.926726	0.354069	0.599564
S100A6	3853.55	0.540936	0.64322	0.840983	0.400358	0.638031
S100A4	3311.92	1.38191	0.671699	2.05734	0.0396537	0.181243
S100A13	44.6018	0.774474	0.443682	1.74556	0.0808874	0.267698
CHTOP	1537.2	0.00548274	0.196854	0.0278518	0.97778	0.98979
SNAPIN	217.006	-0.339762	0.337818	-1.00575	0.314535	0.562935
ILF2	5246.74	0.158566	0.349631	0.453525	0.650171	0.820307
INTS3	2080.59	-0.651146	0.50038	-1.3013	0.193155	0.431038
SLC27A3	159.761	0.299531	0.624839	0.479373	0.631673	0.80918
GATAD2B	2336.25	-0.334312	0.336645	-0.99307	0.320676	0.569434
DENND4B	1858.38	-0.112124	0.363579	-0.308389	0.757786	0.882188
CRTC2	913.951	0.40646	0.441375	0.920895	0.357105	0.603105
SLC39A1	582.227	0.145483	0.302762	0.48052	0.630857	0.80853
CREB3L4	411.432	-0.903033	0.463853	-1.94681	0.0515577	0.211892
JTB	1792.18	0.581347	0.326235	1.78199	0.0747507	0.256528
RAB13	190.05	0.999209	0.56702	1.76221	0.0780335	0.262737
RPS27	28815.8	0.304268	0.498159	0.610785	0.541342	0.745796
NUP210L	34.5306	-0.486808	0.733154	-0.663991	0.506696	0.721628
TPM3	14186.7	0.916681	0.399907	2.29224	0.021892	0.12679
C1orf43	2039.84	0.634557	0.269523	2.35438	0.0185538	0.115541
UBAP2L	3277.03	0.275437	0.280091	0.983386	0.325418	0.573382
HAX1	706.387	-0.0688658	0.353935	-0.194572	0.845728	0.92916
ATP8B2	1671.63	-1.57678	0.39026	-4.04033	5.33769e-05	0.00170996
IL6R	1440.54	1.72819	0.744135	2.32242	0.0202105	0.121366
SHE	19.0949	-0.48232	0.965054	-0.499786	0.617226	0.799324
UBE2Q1	1556.19	0.638193	0.313735	2.03417	0.041934	0.187418
CHRNB2	71.2065	-1.91743	1.2185	-1.57359	0.115581	0.327964
ADAR	14127.7	0.107003	0.283014	0.378084	0.705368	0.851186
KCNN3	36.6359	-0.831671	0.805075	-1.03304	0.301587	0.551596
PMVK	194.595	0.160456	0.422228	0.380021	0.70393	0.850481
PBXIP1	4952.09	-0.916925	0.359842	-2.54813	0.0108302	0.0820194
PYGO2	800.681	-0.191323	0.274757	-0.696334	0.486219	0.705532
SHC1	1062.52	0.466464	0.23034	2.02511	0.0428564	0.189835
CKS1B	546.05	0.174882	0.530834	0.329447	0.741818	0.872462
FLAD1	547.723	0.39961	0.210022	1.9027	0.0570793	0.222508
ZBTB7B	688.844	1.48629	0.713405	2.08338	0.0372165	0.174828
ADAM15	843.974	1.60934	0.617507	2.60618	0.00915571	0.0734497
EFNA4	105.111	0.506117	0.418507	1.20934	0.226532	0.470869
EFNA3	52.8194	0.0562962	0.710439	0.0792414	0.936841	0.972841
EFNA1	76.6706	-0.0445052	0.677992	-0.0656427	0.947662	0.977275
SLC50A1	400.975	0.669164	0.311727	2.14663	0.0318225	0.15842
DPM3	100.423	0.334618	0.433039	0.77272	0.439688	0.669411
KRTCAP2	481.449	1.01233	0.388239	2.60748	0.00912109	0.0733182
TRIM46	152.699	-3.48622	0.638892	-5.45666	4.85187e-08	5.26927e-06
MUC1	65.9592	0.257082	0.561882	0.457536	0.647285	0.818758
THBS3	442.193	-0.684322	0.387414	-1.76638	0.0773314	0.261576
MTX1	342.713	0.315901	0.315979	0.999754	0.31743	0.56583
GBAP1	168.889	-1.87319	0.524785	-3.56945	0.00035773	0.00756618
GBA	466.792	0.223209	0.390956	0.570931	0.568046	0.765438
FAM189B	131.194	-0.422907	0.411788	-1.027	0.30442	0.554356
SCAMP3	536.549	0.466657	0.304279	1.53365	0.125116	0.341775
CLK2	1193.02	-0.732552	0.319131	-2.29546	0.0217067	0.126002
HCN3	82.4643	-1.30691	0.442482	-2.95358	0.00314112	0.0360234
PKLR	68.1558	-2.27558	0.958839	-2.37327	0.0176314	0.111983
FDPS	1419	-0.26763	0.323926	-0.826209	0.408685	0.644312
RUSC1-AS1	19.8717	-1.21643	0.76267	-1.59496	0.110722	0.320689
RUSC1	267.2	0.323385	0.397487	0.813573	0.41589	0.649981
ASH1L	8921.09	-0.181129	0.245557	-0.737626	0.460742	0.687235
ASH1L-AS1	256.43	-0.126983	0.370838	-0.342421	0.732034	0.866679
MSTO1	328.134	-0.599067	0.28701	-2.08727	0.0368636	0.173797
MSTO2P	178.696	-1.08696	0.314622	-3.45481	0.00055069	0.0105277
YY1AP1	3354.82	0.432111	0.28333	1.52512	0.12723	0.344521
SCARNA26A	610.532	0.422782	0.500178	0.845262	0.397964	0.636386
DAP3	1496.48	0.00164019	0.22187	0.00739258	0.994102	0.997489
GON4L	3129.26	-0.396681	0.244453	-1.62273	0.104648	0.310917
SYT11	299.583	-0.759895	0.567604	-1.33878	0.180643	0.415907
RIT1	3421.86	0.73408	0.485475	1.51209	0.130512	0.349028
KIAA0907	1344.33	-0.474995	0.32041	-1.48246	0.138218	0.360552
SNORA80E	73.5476	0.0798821	0.700536	0.11403	0.909214	0.960612
SCARNA4	64.2719	-1.61603	0.766248	-2.10901	0.0349435	0.16795
ARHGEF2	5942.28	0.331445	0.296679	1.11718	0.263916	0.513588
SSR2	2823.97	-0.149547	0.414688	-0.360625	0.71838	0.857876
UBQLN4	746.61	-0.204183	0.24033	-0.849595	0.395551	0.634761
LAMTOR2	346.073	0.629341	0.432016	1.45675	0.145185	0.369796
MEX3A	246.934	-0.742077	0.654622	-1.13359	0.256965	0.504927
LMNA	1321.66	1.43323	0.824893	1.73747	0.0823044	0.270224
SEMA4A	452.097	-0.11008	0.73338	-0.1501	0.880686	0.946316
SLC25A44	740.767	0.264306	0.295077	0.89572	0.370403	0.613717
PMF1	817.801	0.51253	0.370885	1.38191	0.167	0.397956
PMF1-BGLAP	34.3989	-0.526652	0.545295	-0.965811	0.334139	0.582167
BGLAP	17.7971	-0.215667	0.839221	-0.256985	0.79719	0.903313
PAQR6	150.931	0.551577	0.463961	1.18884	0.234501	0.480005
SMG5	3702.09	0.374766	0.263277	1.42347	0.1546	0.383638
TMEM79	110.426	-0.723888	0.620771	-1.16611	0.24357	0.489811
GLMP	171.569	-0.320174	0.53348	-0.600161	0.548399	0.750258
CCT3	3180.53	0.0925189	0.331845	0.278802	0.780397	0.894412
MEF2D	4024.49	0.706247	0.385204	1.83344	0.0667379	0.241558
IQGAP3	961.46	-0.646512	0.500465	-1.29182	0.196418	0.435557
TTC24	234.429	-2.2785	0.661241	-3.44579	0.000569387	0.0108114
APOA1BP	408.771	0.136865	0.327361	0.418087	0.675884	0.833721
GPATCH4	372.878	0.090788	0.297954	0.304705	0.760591	0.883682
NES	28.7383	-0.043081	0.984417	-0.043763	0.965093	0.984242
CRABP2	35.0608	0.11679	0.641239	0.182132	0.855479	0.934434
ISG20L2	716.417	0.456699	0.265079	1.72288	0.0849106	0.275241
RRNAD1	149.773	-0.513666	0.378151	-1.35836	0.174349	0.408164
MRPL24	276.026	0.337973	0.505686	0.668346	0.503913	0.720469
HDGF	5900.21	0.671471	0.380368	1.76532	0.0775101	0.261719
PRCC	825.353	0.367913	0.250771	1.46713	0.142341	0.365521
SH2D2A	160.575	-2.8373	0.556011	-5.10295	3.34394e-07	2.61254e-05
PEAR1	54.3085	0.739406	0.681284	1.08531	0.277783	0.528672
ARHGEF11	263.673	-2.11241	0.757752	-2.78773	0.00530791	0.0510232
ETV3	969.208	0.713713	0.474845	1.50305	0.132827	0.351901
FCRL5	39.5233	-1.23563	0.734734	-1.68174	0.0926185	0.290198
FCRL3	64.0895	-0.134356	0.745844	-0.18014	0.857043	0.934883
FCRL2	27.5772	-0.697445	0.884993	-0.788079	0.43065	0.662436
FCRL1	89.6136	-0.785688	0.931863	-0.843136	0.399152	0.63747
CD5L	52.2805	-0.287308	1.1437	-0.25121	0.801652	0.905755
KIRREL	205.205	-0.611324	1.34326	-0.455106	0.649033	0.819546
CD1D	224.022	-4.78252	0.762736	-6.27022	3.60527e-10	8.23993e-08
CD1C	126.602	-4.6327	0.868316	-5.33527	9.54033e-08	9.6749e-06
SPTA1	5063.73	0.351979	1.14545	0.307283	0.758628	0.882606
MNDA	290.786	-1.65979	0.694291	-2.39062	0.0168199	0.10886
PYHIN1	327.998	-0.811793	0.77146	-1.05228	0.292671	0.543037
IFI16	3518.02	-0.518041	0.405635	-1.27711	0.201563	0.440482
AIM2	54.1568	-0.646856	1.09481	-0.590836	0.55463	0.755221
CADM3	19.5707	-1.34674	1.33806	-1.00649	0.314182	0.562788
ACKR1	52.8572	0.892419	1.16422	0.766541	0.443355	0.672587
FCER1A	188.02	1.05638	1.06523	0.99169	0.321349	0.570066
DUSP23	117.936	0.00980038	0.713389	0.0137378	0.989039	0.995505
FCRL6	40.6593	0.20804	0.876635	0.237316	0.812411	0.91199
SLAMF8	20.6236	-1.86379	0.831866	-2.24049	0.0250589	0.137241
C1orf204	21.5956	-1.59459	0.743049	-2.14602	0.0318717	0.158509
CFAP45	111.131	-0.176557	0.661171	-0.267036	0.789441	0.899698
TAGLN2	6667.41	0.309192	0.473853	0.652506	0.514075	0.72655
PIGM	580.858	0.000693791	0.379296	0.00182915	0.998541	0.998997
KCNJ10	17.6479	-0.195469	1.09825	-0.177981	0.858738	0.935999
IGSF8	368.808	-0.637142	0.339998	-1.87396	0.0609363	0.23082
ATP1A2	13.7341	0.385773	1.10438	0.349311	0.726856	0.862784
LOC729867	42.8363	-0.0597031	0.688206	-0.0867517	0.930869	0.970285
PEA15	553.042	0.0387734	0.392831	0.0987025	0.921374	0.964996
DCAF8	3995.3	-0.555537	0.327628	-1.69563	0.089956	0.285872
PEX19	932.991	0.136741	0.261343	0.523226	0.600817	0.787698
COPA	4327.56	0.206677	0.20201	1.0231	0.306259	0.555924
SUMO1P3	114.456	-0.685457	0.626111	-1.09479	0.273611	0.525072
NCSTN	1163.17	0.683906	0.269011	2.5423	0.0110126	0.082949
NHLH1	8.37184	-0.974575	0.821571	-1.18623	0.23553	0.481275
VANGL2	296.431	-1.46637	0.604621	-2.42527	0.0152972	0.102559
SLAMF6	409.04	-2.32835	0.735921	-3.16386	0.00155692	0.0221985
CD84	2973.85	-0.0490574	0.462223	-0.106134	0.915476	0.962936
SLAMF1	203.684	-1.69802	0.67266	-2.52434	0.0115917	0.08574
CD48	1341.62	-1.27385	0.514733	-2.47478	0.0133319	0.0942959
SLAMF7	111.746	-0.710103	0.613212	-1.15801	0.246861	0.493034
LY9	510.607	-1.07219	0.523309	-2.04888	0.0404743	0.183476
CD244	915.933	0.927449	0.511607	1.81282	0.06986	0.247574
F11R	2215.79	0.952113	0.345636	2.75467	0.00587507	0.0546568
TSTD1	245.858	-0.904773	0.42428	-2.13249	0.0329664	0.16211
USF1	1880.42	0.105734	0.292941	0.36094	0.718144	0.857796
ARHGAP30	3967.56	-0.138526	0.373108	-0.371276	0.710432	0.853414
PVRL4	16.5049	1.43023	0.881047	1.62333	0.104519	0.310717
PFDN2	409.127	1.15648	0.40543	2.85247	0.00433809	0.0449149
NIT1	323.695	-0.430899	0.34102	-1.26356	0.206389	0.446648
DEDD	754.764	0.124487	0.283737	0.438741	0.660849	0.826139
UFC1	1488.07	0.25761	0.370546	0.695218	0.486919	0.706079
USP21	329.861	-0.16047	0.192865	-0.832033	0.40539	0.641694
PPOX	295.151	0.11085	0.520789	0.212849	0.831445	0.921234
B4GALT3	616.599	0.428919	0.28583	1.50061	0.133457	0.352616
ADAMTS4	13.0232	0.235686	1.04375	0.225808	0.821351	0.916783
NDUFS2	1130.15	0.341408	0.228931	1.49131	0.13588	0.356392
FCER1G	461.841	-0.131093	0.715226	-0.183289	0.854572	0.933929
TOMM40L	463.314	-0.191626	0.400654	-0.478284	0.632448	0.809655
MPZ	80.0544	-0.238502	0.416888	-0.572102	0.567253	0.764643
SDHC	664.252	-0.025513	0.285811	-0.0892653	0.928871	0.968987
FCGR2A	1273.59	0.193242	0.667429	0.289531	0.772175	0.890511
HSPA6	208.433	-0.331536	0.879667	-0.376888	0.706257	0.851449
FCGR3A	370.38	-1.45836	0.604069	-2.41422	0.0157689	0.104487
FCGR2C	230.433	1.24713	0.679804	1.83454	0.0665742	0.241456
HSPA7	186.679	1.14357	0.760771	1.50317	0.132794	0.351874
FCGR3B	47.8727	-1.98108	0.782254	-2.53253	0.0113244	0.0843434
FCGR2B	174.078	0.823621	0.709982	1.16006	0.246025	0.492082
FCRLA	26.1262	-0.21487	0.877916	-0.24475	0.80665	0.908386
DUSP12	586.179	1.01025	0.401768	2.5145	0.0119201	0.0875035
ATF6	3400.17	0.44353	0.220863	2.00817	0.0446254	0.194316
OLFML2B	51.5925	0.756277	0.786754	0.961262	0.336421	0.584167
NOS1AP	48.2264	0.833515	1.00257	0.831379	0.40576	0.642078
C1orf226	24.4328	-0.261704	0.981851	-0.266541	0.789823	0.899959
SH2D1B	36.3049	-0.704209	0.649922	-1.08353	0.278574	0.529585
UHMK1	10115.6	0.676998	0.292358	2.31565	0.0205776	0.122466
UAP1	759.881	0.767362	0.723536	1.06057	0.288885	0.539408
DDR2	22.8319	-0.712117	0.730737	-0.974519	0.329799	0.577431
HSD17B7	221.969	-0.422296	0.459649	-0.918737	0.358233	0.603811
RGS5	131.342	-1.03592	0.483831	-2.14107	0.0322681	0.159793
NUF2	448.846	-0.734036	0.510528	-1.4378	0.150492	0.377474
PBX1	155.392	-0.374396	0.684957	-0.546597	0.584655	0.777445
MGST3	494.081	0.702751	0.743265	0.945492	0.344408	0.591047
ALDH9A1	1208.48	0.571684	0.284336	2.01059	0.0443687	0.193677
TMCO1	1572.93	0.460926	0.199459	2.31089	0.0208392	0.123197
LOC100147773	38.6075	-0.685336	0.496829	-1.37942	0.167765	0.399035
UCK2	1160.67	-0.00342865	0.369529	-0.00927843	0.992597	0.997221
POGK	2069.71	0.374452	0.242573	1.54367	0.122669	0.338152
TADA1	1010.97	0.619304	0.36226	1.70956	0.087348	0.280823
ILDR2	1075.73	0.662483	0.460517	1.43856	0.150274	0.377175
GPA33	446.244	-0.918096	0.796846	-1.15216	0.249255	0.496337
DUSP27	18.1844	2.78162	0.924328	3.00934	0.00261814	0.031693
POU2F1	3211.48	0.226872	0.306778	0.739531	0.459584	0.686822
CD247	1184.79	-0.847719	0.385414	-2.1995	0.0278423	0.146155
CREG1	1842.96	1.19248	0.347734	3.42928	0.000605182	0.0111922
RCSD1	3555.9	-0.802697	0.559056	-1.43581	0.151057	0.378396
MPZL1	1659.67	0.560357	0.310545	1.80443	0.0711639	0.250571
ADCY10	15.3999	-0.3023	0.494235	-0.611653	0.540768	0.745497
MPC2	1473.59	0.582577	0.370129	1.57398	0.115491	0.327934
DCAF6	1637.29	-0.134833	0.291367	-0.462759	0.643537	0.816374
GPR161	87.36	0.323233	0.777724	0.415614	0.677692	0.834943
TIPRL	1560.3	0.367493	0.245197	1.49877	0.133934	0.353366
SFT2D2	769.755	0.796492	0.286167	2.78331	0.00538074	0.0515293
TBX19	75.7877	-0.350913	0.427868	-0.820143	0.412135	0.647284
XCL2	37.4901	0.591006	0.92636	0.637987	0.523482	0.732561
XCL1	23.6653	-1.46308	0.665805	-2.19747	0.0279872	0.146469
ATP1B1	350.243	1.48158	0.515746	2.87268	0.00407004	0.0431611
NME7	248.996	-0.344399	0.388537	-0.886398	0.375403	0.618315
BLZF1	698.009	0.599304	0.307483	1.94907	0.0512876	0.211291
SLC19A2	369.743	0.184893	0.427074	0.432929	0.665067	0.828257
F5	120.776	-2.19028	0.769185	-2.84754	0.00440587	0.0451646
SELP	62.3072	1.09335	0.671274	1.62876	0.103363	0.309201
SELL	6045.05	-0.487579	0.533975	-0.913112	0.361183	0.606389
METTL18	205.502	0.28013	0.344538	0.813059	0.416184	0.650309
C1orf112	640.711	-1.55794	0.495395	-3.14484	0.00166179	0.0230289
SCYL3	444.732	-0.516975	0.390192	-1.32492	0.185196	0.422199
KIFAP3	931.726	-0.351231	0.308713	-1.13772	0.255236	0.503014
GORAB	502.718	-0.0819045	0.393289	-0.208256	0.835029	0.923168
PRRX1	30.4702	-1.56007	1.06914	-1.45918	0.144516	0.368686
FMO4	58.8407	-0.449653	0.580937	-0.774014	0.438922	0.668803
TOP1P1	28.6597	-0.109131	0.579629	-0.188277	0.85066	0.932702
PRRC2C	21708.4	0.059671	0.347936	0.1715	0.863831	0.938477
VAMP4	827.412	0.0280418	0.220121	0.127393	0.89863	0.955382
METTL13	572.651	0.0205097	0.381688	0.0537341	0.957147	0.980912
DNM3	249.311	-0.445285	0.535041	-0.832244	0.405271	0.641632
DNM3OS	47.2209	-0.715684	1.11721	-0.640602	0.521781	0.731964
PIGC	758.052	0.643727	0.299643	2.14831	0.0316889	0.158111
SUCO	5563.89	0.470154	0.383207	1.22689	0.219863	0.462848
FASLG	27.8978	0.819036	0.765625	1.06976	0.284726	0.535091
TNFSF4	742.289	1.29713	0.639898	2.02709	0.0426532	0.189254
LOC100506023	96.4587	-0.327662	0.415727	-0.788167	0.430599	0.662423
LOC101928673	50.3895	-0.737827	0.517114	-1.42682	0.153632	0.38216
PRDX6	2944.26	0.555383	0.305063	1.82056	0.0686744	0.245531
KLHL20	792.007	0.25937	0.30773	0.842847	0.399314	0.63747
CENPL	340.706	-0.0715047	0.322909	-0.221439	0.82475	0.918369
DARS2	596.686	0.0617128	0.40827	0.151157	0.879852	0.945926
GAS5-AS1	103.067	-0.462946	0.990718	-0.467283	0.640298	0.814494
GAS5	3275.54	0.815352	0.500048	1.63055	0.102986	0.308387
SNORD76	20.1874	0.134297	0.881637	0.152326	0.87893	0.94549
ZBTB37	686.77	-0.0422335	0.335051	-0.126051	0.899692	0.955799
RC3H1	6057.78	0.438846	0.286402	1.53227	0.125455	0.342221
RABGAP1L	3023.9	-0.0888752	0.267122	-0.332714	0.73935	0.871032
GPR52	92.5619	-0.550647	0.498434	-1.10475	0.269267	0.519724
CACYBP	1642.31	0.3918	0.288639	1.3574	0.174653	0.408523
MRPS14	444.682	-0.493516	0.294147	-1.67779	0.0933889	0.291612
KIAA0040	1087.94	0.563624	0.40046	1.40744	0.159296	0.38861
TNR	17.2997	2.03592	0.714199	2.85063	0.00436325	0.0449737
RFWD2	1971.22	0.102776	0.205701	0.499636	0.617331	0.799324
SCARNA3	48.067	-0.176497	0.600933	-0.293705	0.768983	0.888551
PAPPA2	14.0895	1.37349	0.853831	1.60863	0.107698	0.315512
LOC730102	13.4	-1.48545	0.928965	-1.59903	0.109813	0.319285
RASAL2	51.4754	-0.784208	0.877368	-0.893818	0.371419	0.615002
C1orf220	37.661	-0.85689	0.674198	-1.27098	0.203737	0.443261
RALGPS2	1173.17	-0.332722	0.397356	-0.83734	0.402401	0.638677
FAM20B	1710.94	0.331345	0.303107	1.09316	0.274323	0.525674
TOR3A	795.308	0.230662	0.335135	0.688265	0.491286	0.710203
ABL2	2044.69	0.559793	0.330962	1.69142	0.0907576	0.287024
SOAT1	1646.41	0.293924	0.358784	0.819222	0.41266	0.647614
AXDND1	8.22976	-0.781104	0.713375	-1.09494	0.273542	0.525051
TOR1AIP2	5278.24	0.92139	0.323844	2.84517	0.00443882	0.0452842
TOR1AIP1	3269.98	0.867402	0.362055	2.39577	0.0165853	0.107797
CEP350	8101.86	0.128437	0.245819	0.522487	0.601331	0.788176
QSOX1	2504.05	1.37897	0.481805	2.8621	0.00420843	0.0442149
FLJ23867	228.541	0.185628	0.505332	0.36734	0.713366	0.855223
LHX4-AS1	179.085	-1.11216	0.468019	-2.37631	0.0174867	0.111632
ACBD6	919.313	-0.101452	0.265617	-0.381946	0.702501	0.849788
XPR1	1396.72	0.476477	0.220285	2.16301	0.0305408	0.154602
KIAA1614	20.2196	-0.580997	0.689059	-0.843175	0.399131	0.63747
STX6	1107.61	-0.549316	0.323157	-1.69984	0.0891609	0.284323
MR1	1313.97	0.270169	0.296381	0.911559	0.362001	0.606748
IER5	3388.62	0.989184	0.60838	1.62593	0.103964	0.309969
CACNA1E	29.1016	-0.527887	0.98767	-0.534477	0.593012	0.782961
GLUL	33360.6	-0.674871	0.541032	-1.24738	0.212259	0.454102
RNASEL	484.09	0.0138604	0.613559	0.0225901	0.981977	0.992228
RGS16	71.64	-1.8504	0.766689	-2.41349	0.0158004	0.104605
LOC284648	14.1878	0.255991	1.00591	0.254486	0.79912	0.90389
NPL	280.107	0.31125	0.725742	0.428871	0.668017	0.829631
DHX9	13352.7	0.554116	0.373155	1.48495	0.137557	0.359317
LAMC1	111.505	-0.952213	0.722238	-1.31842	0.187363	0.424488
SMG7-AS1	42.4617	-0.65555	0.671548	-0.976178	0.328976	0.57665
SMG7	3188.45	0.0319164	0.335828	0.0950378	0.924285	0.96588
NCF2	1030.56	-1.89307	0.635749	-2.9777	0.00290425	0.0342572
ARPC5	2827.7	0.199859	0.446552	0.44756	0.654471	0.823223
RGL1	76.2989	-1.04541	0.475054	-2.2006	0.0277641	0.1459
COLGALT2	20.5291	0.52504	0.693658	0.756914	0.449101	0.677674
TSEN15	838.94	1.01142	0.384557	2.63009	0.00853631	0.0706576
C1orf21	663.289	1.13052	0.741377	1.52489	0.127287	0.344555
EDEM3	2640.71	0.019833	0.410504	0.0483139	0.961466	0.982708
FAM129A	2448.15	0.375282	0.507926	0.738852	0.459997	0.686858
RNF2	1063.62	0.788002	0.270877	2.90908	0.00362498	0.0398487
TRMT1L	516.843	-0.0578907	0.468111	-0.123669	0.901578	0.956842
SWT1	520.121	-0.191753	0.302089	-0.634758	0.525586	0.733945
IVNS1ABP	4083.86	-0.536046	0.302453	-1.77233	0.0763398	0.259497
HMCN1	17.501	-1.36847	0.894323	-1.53017	0.125974	0.342757
PRG4	43.3656	-1.80815	1.19885	-1.50824	0.131493	0.350204
TPR	11497.7	0.0832262	0.298179	0.279115	0.780157	0.894412
C1orf27	1640.81	0.5293	0.380761	1.39011	0.164495	0.395
OCLM	66.6481	-0.405593	0.350436	-1.1574	0.247111	0.493202
PTGS2	441.792	0.898402	1.0306	0.871729	0.383356	0.625301
PLA2G4A	243.27	2.67125	0.581981	4.58992	4.43411e-06	0.000231337
RGS18	1470.51	1.33553	0.685529	1.94817	0.0513949	0.211505
RGS1	2886.89	0.693395	0.840149	0.825324	0.409188	0.644605
RGS13	35.5088	2.17215	1.0797	2.01182	0.0442393	0.193331
RGS2	2131.49	0.0931133	0.906792	0.102684	0.918214	0.964178
UCHL5	1135.77	0.12266	0.271285	0.452143	0.651166	0.820942
TROVE2	2941.09	0.595177	0.27255	2.18374	0.0289815	0.149697
GLRX2	100.502	1.09974	0.354164	3.10516	0.00190176	0.0252792
CDC73	3313.99	0.395738	0.309391	1.27909	0.200867	0.439634
CFH	303.228	-3.21408	0.833799	-3.85474	0.000115851	0.00320222
ASPM	4811.32	-2.3664	0.707213	-3.3461	0.000819573	0.014133
ZBTB41	828.696	-0.197762	0.56424	-0.350494	0.725968	0.862425
DENND1B	3460.46	0.320072	0.309849	1.03299	0.301607	0.551596
NEK7	1751.18	-0.434765	0.44303	-0.981344	0.326423	0.574064
PTPRC	17657.2	-0.29429	0.334871	-0.878817	0.379501	0.621957
MIR181A1HG	1917.93	-0.741571	0.618337	-1.1993	0.230412	0.475
NR5A2	170.088	1.35914	1.18369	1.14822	0.250878	0.497662
ZNF281	4255.31	1.056	0.370998	2.84638	0.0044219	0.0452624
KIF14	1382.74	-1.08672	0.513282	-2.11719	0.0342436	0.165783
DDX59	869.477	0.378207	0.313941	1.20471	0.228316	0.472298
CAMSAP2	126.134	0.567614	0.758836	0.748006	0.454457	0.682398
C1orf106	31.2616	-0.125131	0.804559	-0.155528	0.876405	0.944167
KIF21B	2240.04	-1.37457	0.380114	-3.6162	0.00029896	0.00658702
TMEM9	454.107	-0.115368	0.40555	-0.284474	0.776047	0.892114
IGFN1	11.3205	-0.315543	0.991121	-0.31837	0.750204	0.877339
PHLDA3	136.323	0.375723	0.769146	0.488494	0.6252	0.804782
CSRP1	980.676	0.36488	0.371276	0.982771	0.32572	0.573568
RPS10P7	65.3022	-1.23324	0.507822	-2.42848	0.0151623	0.10188
NAV1	447.689	-1.95018	0.512854	-3.8026	0.000143185	0.00373524
IPO9-AS1	10.5714	-1.00081	0.709829	-1.40994	0.158558	0.387953
IPO9	2633.05	-0.490093	0.296409	-1.65344	0.0982423	0.299738
LMOD1	13.8908	0.370527	1.34148	0.276208	0.782388	0.895657
TIMM17A	982.311	0.803247	0.338632	2.37204	0.0176903	0.112124
RNPEP	892.394	0.359944	0.366808	0.981287	0.326451	0.574064
ELF3	48.0984	-0.131817	0.699707	-0.188389	0.850572	0.932702
ARL8A	1313.41	1.0972	0.469207	2.33841	0.0193661	0.118527
PTPN7	3370.34	-0.310446	0.344193	-0.901952	0.367082	0.610595
PTPRVP	36.7704	-1.51682	0.662801	-2.2885	0.0221086	0.127418
LGR6	94.5203	-2.12193	0.822242	-2.58067	0.009861	0.0770416
UBE2T	240.664	-0.179155	0.602899	-0.297156	0.766348	0.886656
PPP1R12B	1703.72	0.125999	0.345417	0.364773	0.715281	0.856379
KDM5B	5819.66	0.715902	0.535182	1.33768	0.181001	0.416285
PCAT6	19.9087	1.30069	0.880734	1.47682	0.139723	0.362107
RABIF	477.494	0.279564	0.248455	1.12521	0.2605	0.50939
KLHL12	1080	0.0764513	0.198245	0.38564	0.699763	0.848347
ADIPOR1	3783.67	0.43709	0.384089	1.13799	0.255125	0.50293
CYB5R1	210.654	-0.103468	0.486102	-0.212853	0.831441	0.921234
TMEM183A	1280.66	0.637457	0.409347	1.55725	0.119411	0.333892
TMEM183B	1381.82	0.384389	0.3118	1.23281	0.217648	0.4606
PPFIA4	53.1258	-0.709116	0.55184	-1.285	0.198791	0.437432
CHI3L1	135.407	-3.38685	0.642338	-5.2727	1.34434e-07	1.29471e-05
CHIT1	50.4715	-3.73329	0.960934	-3.88506	0.000102305	0.00287976
LINC01353	19.9114	-0.842312	0.840934	-1.00164	0.316518	0.565295
LINC01136	61.5201	-1.12069	0.683791	-1.63894	0.101226	0.305132
BTG2	5085.24	-0.410793	0.475934	-0.86313	0.388066	0.629905
FMOD	21.31	-1.36815	1.24056	-1.10286	0.27009	0.521024
ATP2B4	7252.76	-0.0911165	0.401595	-0.226887	0.820512	0.916482
SNORA77	26.6816	-0.997464	0.742078	-1.34415	0.1789	0.413946
LINC00260	70.7083	-0.640684	0.476902	-1.34343	0.179133	0.41395
LAX1	926.616	-0.0211487	0.504957	-0.0418823	0.966593	0.984572
ZC3H11A	9718.78	0.156374	0.21763	0.71853	0.472431	0.695315
ZBED6	3212.03	-0.14817	0.282677	-0.524168	0.600161	0.787243
SNRPE	1367.96	0.222137	0.344323	0.64514	0.518836	0.729924
SOX13	126.806	0.34458	0.864804	0.398449	0.6903	0.842566
ETNK2	72.1034	-1.0832	0.846734	-1.27927	0.200801	0.439634
PLEKHA6	85.4877	-0.369935	0.732773	-0.504842	0.61367	0.796501
PPP1R15B	9509.35	0.420974	0.315597	1.3339	0.182237	0.418085
PIK3C2B	1462.65	-0.923444	0.351658	-2.62597	0.00864017	0.0710443
MDM4	16245.4	-0.60775	0.313936	-1.9359	0.0528794	0.214468
LRRN2	115.878	-3.13232	1.08684	-2.88203	0.0039512	0.0422814
NFASC	24.7639	-0.272879	1.10485	-0.246984	0.804921	0.907306
TMEM81	72.5135	0.167129	0.475486	0.35149	0.725221	0.861812
RBBP5	913.386	0.242754	0.24755	0.980624	0.326778	0.574441
DSTYK	1861.07	1.20273	0.4074	2.95221	0.00315507	0.0361088
TMCC2	1707.09	-0.472714	0.832997	-0.567485	0.570384	0.76657
NUAK2	209.623	-0.636067	0.704461	-0.902914	0.366572	0.610209
KLHDC8A	22.5534	0.0839093	1.09299	0.0767705	0.938806	0.97333
CDK18	278.776	-0.697191	0.500977	-1.39166	0.164024	0.394178
MFSD4A	52.7444	-1.61287	0.690975	-2.3342	0.0195853	0.119249
ELK4	4495.76	-0.123855	0.24518	-0.505159	0.613447	0.796348
SLC45A3	375.623	3.41941	0.587286	5.82239	5.8012e-09	8.54171e-07
NUCKS1	9329.97	-0.513946	0.264837	-1.94061	0.0523058	0.213703
RAB29	422.73	0.218961	0.49736	0.440246	0.659759	0.82584
SLC41A1	841.381	-0.00472105	0.337749	-0.013978	0.988848	0.995505
PM20D1	17.0041	-2.10924	0.866211	-2.43502	0.0148909	0.100863
LOC284581	121.829	-1.50604	1.00035	-1.50551	0.132194	0.350952
FAM72A	79.6575	-0.851182	0.877382	-0.970138	0.331978	0.580012
C1orf186	423.437	3.12513	0.81087	3.85404	0.000116184	0.00320564
CTSE	83.5167	-1.44798	1.04274	-1.38863	0.164944	0.395397
SRGAP2	943.529	0.0977743	0.385845	0.253403	0.799957	0.904507
SRGAP2C	180.119	0.0733985	0.875962	0.0837919	0.933222	0.971375
IKBKE	620.112	-0.785208	0.52477	-1.49629	0.134578	0.35427
RASSF5	4482.9	0.201189	0.423281	0.475309	0.634567	0.810706
EIF2D	1209.66	0.102605	0.283955	0.361343	0.717843	0.857637
DYRK3	560.941	0.558124	0.482537	1.15664	0.247418	0.49345
MAPKAPK2	5442.3	0.937416	0.516883	1.81359	0.0697404	0.247379
IL10	83.4143	-2.83527	0.842095	-3.36693	0.00076011	0.0133635
FCMR	451.535	-1.91257	0.454385	-4.20912	2.56362e-05	0.0009693
C1orf116	72.2809	0.717595	0.776706	0.923896	0.35554	0.601128
YOD1	7796.44	0.554949	0.447842	1.23916	0.215285	0.45806
PFKFB2	1125.64	-0.0244024	0.60795	-0.0401389	0.967982	0.985422
CD55	1786.34	0.265877	0.547228	0.48586	0.627066	0.806235
CR2	409.684	-5.19463	0.891458	-5.82712	5.63928e-09	8.38391e-07
CR1	1000.19	-2.69593	0.657665	-4.09925	4.14499e-05	0.00141364
CR1L	81.272	0.149094	1.10275	0.135202	0.892452	0.952486
CD46	4402.93	0.188739	0.222874	0.846842	0.397083	0.635719
CD34	965.702	4.54791	0.756528	6.01156	1.83745e-09	3.38999e-07
PLXNA2	84.3082	-0.526227	0.66683	-0.789147	0.430026	0.662056
LAMB3	37.2801	0.6994	0.693201	1.00894	0.313002	0.561623
G0S2	647.729	-4.87433	0.961796	-5.06795	4.02122e-07	3.07885e-05
TRAF3IP3	1439.36	-0.745242	0.491051	-1.51765	0.129103	0.347322
C1orf74	175.467	-0.910314	0.558443	-1.63009	0.103082	0.30854
IRF6	16.9538	-1.3183	0.827183	-1.59372	0.110999	0.320961
DIEXF	759.822	0.0636824	0.391323	0.162736	0.870726	0.94132
HHAT	494.51	-1.24716	0.50249	-2.48195	0.0130666	0.0933179
KCNH1	62.7699	-2.09191	1.15916	-1.80469	0.0711238	0.250571
RCOR3	2250.78	0.439175	0.244135	1.7989	0.072034	0.252185
TRAF5	2147.45	-0.0856977	0.387965	-0.22089	0.825178	0.918511
LINC00467	68.0988	-1.07993	0.485779	-2.22309	0.0262097	0.141022
SLC30A1	1051.73	1.50824	0.406075	3.71419	0.000203856	0.00489286
NEK2	388.067	-0.2106	0.591487	-0.356052	0.721802	0.859358
LPGAT1	3620.12	0.728264	0.271996	2.67748	0.0074178	0.0643928
INTS7	805.167	-0.408424	0.51562	-0.792103	0.4283	0.661012
DTL	1337.06	0.0545263	0.48158	0.113224	0.909853	0.960868
PPP2R5A	2276.1	0.305742	0.305186	1.00182	0.31643	0.565269
TMEM206	621.486	0.692988	0.316728	2.18796	0.0286725	0.148986
NENF	462.944	0.999644	0.413217	2.41918	0.0155556	0.103561
ATF3	1353.37	1.28138	0.823143	1.5567	0.119542	0.333892
FAM71A	30.1197	-0.203398	0.853259	-0.238378	0.811588	0.911333
BATF3	19.5563	-2.99689	0.679448	-4.41077	1.03003e-05	0.000461193
NSL1	1548	-0.222002	0.227988	-0.973742	0.330185	0.577908
TATDN3	406.574	0.458967	0.311075	1.47542	0.140099	0.362286
FLVCR1-AS1	32.6869	-0.163789	0.543074	-0.301596	0.76296	0.884824
FLVCR1	535.929	0.0291336	0.274648	0.106076	0.915522	0.962936
VASH2	231.813	-2.10057	0.758284	-2.77016	0.00560288	0.0528631
ANGEL2	1245.34	-0.0788221	0.176631	-0.446253	0.655414	0.823665
RPS6KC1	1053.99	1.1915	0.253608	4.69821	2.62457e-06	0.000149599
SMYD2	685.708	-1.21411	0.414212	-2.93115	0.00337712	0.0378945
PTPN14	1432.7	0.75524	0.829128	0.910884	0.362356	0.607019
CENPF	8042.81	-0.772354	0.572556	-1.34896	0.17735	0.412354
KCTD3	204.872	-0.274396	0.728134	-0.376848	0.706287	0.851449
GPATCH2	795.388	-0.425684	0.312625	-1.36165	0.17331	0.406851
RRP15	982.03	0.0727128	0.294305	0.247066	0.804857	0.907306
TGFB2	48.2009	-0.516033	0.956979	-0.539231	0.589728	0.780891
LYPLAL1-AS1	9.95578	0.906943	0.849797	1.06725	0.285861	0.536247
LYPLAL1	256.253	0.0574434	0.287773	0.199614	0.841783	0.927096
EPRS	3975.11	0.346675	0.307561	1.12717	0.259669	0.508349
BPNT1	301.561	-0.089904	0.415577	-0.216335	0.828726	0.919653
IARS2	1565.9	0.348378	0.278396	1.25138	0.210796	0.452534
RAB3GAP2	2540.23	0.172245	0.265737	0.648176	0.516871	0.728673
AURKAPS1	400.973	-0.214769	0.33285	-0.645243	0.51877	0.729924
C1orf115	12.2081	-1.33341	0.803705	-1.65908	0.0971006	0.298171
2023-03-01	77.2057	-1.42449	0.884653	-1.61023	0.107348	0.315029
HLX	515.403	2.61212	0.664759	3.92942	8.5151e-05	0.00249315
DUSP10	4483.7	0.687573	0.557387	1.23357	0.217365	0.460315
TAF1A	151.019	0.0559124	0.435175	0.128483	0.897767	0.955382
MIA3	4177.29	0.509657	0.341416	1.49277	0.135496	0.35571
AIDA	1007.22	-0.100919	0.295156	-0.341919	0.732412	0.866819
BROX	2475.88	0.880657	0.23905	3.68398	0.000229619	0.00540115
DISP1	137.414	-0.537749	0.564595	-0.95245	0.340869	0.587806
TLR5	74.7415	-1.03189	0.983411	-1.0493	0.294041	0.544083
SUSD4	79.2621	-3.30157	0.850761	-3.88073	0.000104144	0.00291015
CAPN2	1769.44	0.0965845	0.586989	0.164542	0.869304	0.940753
TP53BP2	3365.15	0.886229	0.434478	2.03976	0.0413746	0.185974
GTF2IP20	174.907	-0.629389	0.409135	-1.53834	0.123965	0.340216
FBXO28	1444.25	0.668254	0.306134	2.18288	0.0290445	0.149815
DEGS1	960.961	0.726233	0.326745	2.22263	0.0262407	0.141139
NVL	810.247	-0.165054	0.278408	-0.592848	0.553283	0.753975
CNIH4	424.233	0.738493	0.473946	1.55818	0.119191	0.333731
WDR26	8605.05	0.249895	0.331406	0.754046	0.450822	0.67929
CNIH3	30.8771	-0.332441	0.768433	-0.432622	0.66529	0.828266
DNAH14	559.778	-0.574198	0.805977	-0.712425	0.476202	0.697473
LBR	6028.4	0.290918	0.255008	1.14082	0.253946	0.501637
ENAH	132.914	0.820148	0.94986	0.863442	0.387895	0.629887
SRP9	4047.19	0.118105	0.253398	0.466085	0.641155	0.81484
EPHX1	83.5816	0.676033	0.528488	1.27918	0.200832	0.439634
TMEM63A	1443.26	-1.02836	0.519892	-1.97803	0.0479258	0.202564
PYCR2	748.997	0.24635	0.297402	0.828341	0.407477	0.643534
SDE2	4363.65	0.2335	0.414375	0.563499	0.573095	0.768454
H3F3A	192.881	1.56114	0.989229	1.57814	0.114534	0.326441
H3F3AP4	10213.4	-0.0278519	0.344461	-0.0808565	0.935556	0.972519
ACBD3	1933.32	0.724119	0.412392	1.7559	0.0791056	0.264463
LIN9	336.549	-0.197249	0.36154	-0.54558	0.585355	0.777958
PARP1	3809.11	0.345166	0.300209	1.14975	0.250246	0.496978
C1orf95	14.6838	-1.087	1.25654	-0.865076	0.386997	0.629175
ITPKB	2706.19	-0.395852	0.276919	-1.42949	0.152865	0.381309
ITPKB-IT1	46.3473	-1.66803	0.549386	-3.03617	0.00239601	0.0297567
PSEN2	75.6821	1.45185	0.762491	1.90409	0.056898	0.222508
ADCK3	1902.55	1.56079	0.284734	5.48159	4.21523e-08	4.74616e-06
CDC42BPA	218.684	-1.58024	0.645796	-2.44696	0.0144068	0.0989732
ZNF678	1341.25	-0.0650003	0.323944	-0.200653	0.84097	0.926592
LOC100130093	51.1877	-2.44763	0.774026	-3.16221	0.00156579	0.0222627
JMJD4	263.466	-0.218068	0.297915	-0.731979	0.464181	0.689324
SNAP47	352.524	-0.140283	0.261282	-0.536905	0.591333	0.781837
ARF1	6726.66	0.876276	0.423596	2.06866	0.0385782	0.17896
C1orf35	303.847	0.243052	0.341082	0.712591	0.476099	0.697455
MRPL55	229.962	0.202883	0.353824	0.573402	0.566373	0.763995
GUK1	1972.29	0.216756	0.325921	0.665056	0.506014	0.721238
GJC2	32.458	-1.72782	0.498244	-3.46783	0.000524681	0.0101189
IBA57	944.975	-0.0564686	0.389666	-0.144915	0.884778	0.948147
C1orf145	36.4668	-1.23451	0.637745	-1.93574	0.0528993	0.214468
OBSCN	3792.87	-2.848	0.490133	-5.81067	6.22224e-09	8.98878e-07
TRIM11	903.01	0.414919	0.362544	1.14446	0.252432	0.499482
TRIM17	47.4768	-1.58742	0.980289	-1.61934	0.105374	0.311746
HIST3H2A	29.4688	-2.27916	0.871097	-2.61643	0.00888556	0.0723363
HIST3H2BB	165.608	0.218503	1.00974	0.216394	0.82868	0.919653
RNF187	1241.53	0.244317	0.294089	0.830758	0.40611	0.642241
RHOU	1070.8	-0.0102919	0.702329	-0.0146539	0.988308	0.99533
RAB4A	904.732	0.682173	0.301673	2.2613	0.0237407	0.132583
CCSAP	2209.89	0.150801	0.376256	0.400794	0.688572	0.841385
NUP133	1906.04	0.0510623	0.167387	0.305055	0.760324	0.883662
ABCB10	1724.68	-0.1709	0.365129	-0.468053	0.639746	0.814244
TAF5L	1396.54	0.717465	0.33312	2.15378	0.0312577	0.156883
URB2	903.82	0.0184301	0.271117	0.0679785	0.945803	0.97687
GALNT2	2744.62	-0.304966	0.379373	-0.803867	0.421474	0.655346
PGBD5	14.5075	-2.12234	0.972345	-2.1827	0.029058	0.149815
COG2	649.247	0.0415314	0.318612	0.130351	0.896289	0.954973
C1orf198	341.16	0.856689	0.594004	1.44223	0.149239	0.375786
TTC13	534.68	-1.01624	0.487462	-2.08476	0.0370913	0.174548
ARV1	185.887	0.417514	0.579007	0.721086	0.470857	0.694159
FAM89A	38.1514	0.434984	0.943856	0.460858	0.6449	0.817023
TRIM67	21.5771	-0.0320587	1.13504	-0.0282446	0.977467	0.989748
C1orf131	225.58	0.0920742	0.272224	0.33823	0.73519	0.868603
GNPAT	1105.1	0.0426438	0.28872	0.147699	0.88258	0.947022
EXOC8	2748.68	0.296054	0.298416	0.992088	0.321155	0.569854
SPRTN	880.748	0.478797	0.355014	1.34867	0.177443	0.412426
EGLN1	338.084	-1.40557	0.529736	-2.65334	0.00796992	0.0672416
TSNAX-DISC1	179.921	-0.263856	0.66821	-0.39487	0.692939	0.844546
TSNAX	1283.81	0.462062	0.284478	1.62425	0.104323	0.310435
DISC1	1574.54	0.479569	0.566578	0.846432	0.397312	0.635874
SIPA1L2	1367.99	1.60098	0.560104	2.85836	0.00425831	0.0444374
MAP10	857.582	0.923498	0.40067	2.30489	0.021173	0.124653
NTPCR	311.654	0.759846	0.548162	1.38617	0.165695	0.396327
PCNX2	1091.58	-2.13486	0.595468	-3.58518	0.000336846	0.00726495
KIAA1804	201.886	0.302363	0.693877	0.435758	0.663012	0.827066
SLC35F3	31.2285	-1.51131	0.81718	-1.84942	0.064397	0.23756
LOC101927765	100.926	-0.146746	0.366386	-0.400524	0.688771	0.841483
COA6	229.479	0.411713	0.333967	1.2328	0.217652	0.4606
TARBP1	4230.27	0.444779	0.432566	1.02823	0.30384	0.553696
IRF2BP2	14557.7	0.818053	0.417908	1.95749	0.0502894	0.208638
LINC01132	102.884	-0.123808	0.617793	-0.200404	0.841165	0.92674
LOC101927851	25.2998	3.77945	0.871678	4.33583	1.45208e-05	0.000614248
TOMM20	7755.21	0.861676	0.451844	1.90702	0.0565179	0.221621
SNORA14B	53.5294	0.679544	0.685299	0.991603	0.321391	0.570076
RBM34	1562.47	0.271076	0.314227	0.862675	0.388316	0.62997
ARID4B	7045.6	0.173664	0.393119	0.441759	0.658663	0.825107
GGPS1	408.105	-0.0360545	0.284163	-0.12688	0.899036	0.955506
TBCE	536	0.227353	0.340038	0.668609	0.503745	0.720469
B3GALNT2	1010.36	0.0340538	0.373315	0.09122	0.927318	0.968029
GNG4	122.933	-0.999141	1.0631	-0.939834	0.347303	0.593356
LYST	8351.4	1.30255	0.575001	2.2653	0.0234943	0.132025
NID1	66.1578	-0.905805	0.691057	-1.31075	0.189942	0.426978
GPR137B	213.877	0.00128922	0.444948	0.00289745	0.997688	0.998797
ERO1B	740.904	-0.034828	0.311495	-0.111809	0.910975	0.961318
EDARADD	30.7623	-0.043284	0.831557	-0.0520518	0.958487	0.98176
LGALS8	3840.1	0.483375	0.313394	1.54239	0.12298	0.338822
LGALS8-AS1	22.5739	-0.987374	0.618332	-1.59683	0.110303	0.320029
HEATR1	3418.08	0.14762	0.186495	0.791549	0.428624	0.66127
MTR	2552.62	-0.65303	0.301146	-2.16848	0.0301222	0.153243
CHRM3-AS2	22.4169	-1.01234	0.960581	-1.05388	0.291937	0.542396
FH	641.277	0.808986	0.471919	1.71425	0.086483	0.278803
KMO	49.7018	0.132206	0.599834	0.220404	0.825556	0.918625
OPN3	263.21	0.0988143	0.562875	0.175553	0.860645	0.936966
CHML	2491.41	0.0811564	0.332284	0.244238	0.807046	0.908565
EXO1	546.852	-0.409521	0.606596	-0.675113	0.499604	0.717138
LINC01347	398.795	-0.833932	0.458443	-1.81905	0.0689033	0.245776
CEP170	4338.83	0.854026	0.285455	2.99181	0.00277332	0.0331263
SDCCAG8	892.38	0.124378	0.349262	0.356118	0.721753	0.859358
AKT3	473.031	0.078469	0.671672	0.116826	0.906998	0.959705
ZBTB18	1939.43	-0.090502	0.236695	-0.382357	0.702196	0.849616
ADSS	1260.7	0.144286	0.311692	0.462912	0.643428	0.816373
C1orf101	48.7334	-0.231325	0.491202	-0.470936	0.637686	0.812928
DESI2	1654.82	0.434009	0.282531	1.53614	0.124503	0.340754
COX20	1175.87	-0.139512	0.334618	-0.416927	0.676732	0.834204
HNRNPU	19935.1	0.0997236	0.15121	0.659505	0.509572	0.72378
LOC101928068	148.046	-0.126309	0.344693	-0.366439	0.714038	0.855627
EFCAB2	259.622	0.424754	0.413696	1.02673	0.304547	0.5544
KIF26B	146.303	3.38137	0.728613	4.64083	3.47009e-06	0.000189777
SMYD3	573.284	0.778847	0.404095	1.92739	0.0539315	0.216595
TFB2M	590.107	0.943421	0.308735	3.05577	0.00224485	0.0283786
CNST	2592.2	0.824292	0.32791	2.51377	0.0119447	0.0875785
SCCPDH	1737.49	0.800516	0.349503	2.29044	0.021996	0.127151
LINC01341	71.6496	1.16601	0.589889	1.97666	0.0480797	0.202911
AHCTF1	6555.41	0.102515	0.412125	0.248748	0.803556	0.906766
ZNF695	131.98	-1.07535	0.455962	-2.35842	0.0183529	0.11485
ZNF670	133.209	-0.285501	0.462167	-0.617744	0.536744	0.742002
ZNF669	698.788	0.156941	0.296511	0.529291	0.596604	0.78574
ZNF124	1768.52	-0.197569	0.329792	-0.599073	0.549124	0.750847
ZNF496	923.671	-0.494324	0.296355	-1.66802	0.0953124	0.295445
NLRP3	2175.52	1.0457	0.618657	1.69027	0.090976	0.287075
GCSAML	389.445	0.48135	0.91757	0.524592	0.599867	0.787199
TRIM58	1779.62	0.154637	0.779141	0.198471	0.842676	0.927537
OR2W3	98.2201	0.625039	0.765148	0.816886	0.413993	0.64854
SH3BP5L	688.76	0.462528	0.283949	1.62891	0.103331	0.309166
ZNF672	465.295	0.222413	0.35824	0.620849	0.534699	0.740798
ZNF692	499.748	-0.869275	0.469863	-1.85006	0.0643052	0.237278
PGBD2	184.124	-0.229325	0.657413	-0.34883	0.727217	0.863112
FAM110C	243.931	-6.57269	0.830862	-7.91069	2.55959e-15	3.53282e-12
SH3YL1	570.465	-0.672783	0.453166	-1.48463	0.137643	0.359374
ACP1	2356.73	0.57808	0.334976	1.72573	0.0843951	0.274599
TMEM18	469.832	-0.147583	0.258436	-0.571062	0.567958	0.765438
LINC01115	28.152	-1.67462	0.946353	-1.76956	0.0768013	0.26042
PXDN	1467.37	-3.79233	0.985404	-3.84851	0.00011884	0.00326714
MYT1L	35.403	-2.22976	1.21674	-1.83257	0.0668663	0.241834
TSSC1	377.791	-0.492504	0.489454	-1.00623	0.314304	0.562788
TRAPPC12	476.878	-0.578463	0.441646	-1.30979	0.190267	0.427395
ADI1	953.282	0.686756	0.341336	2.01197	0.0442236	0.193331
RNASEH1	585.881	0.479638	0.302772	1.58416	0.113158	0.32425
RNASEH1-AS1	58.4375	-0.508622	0.353128	-1.44033	0.149773	0.376473
RPS7	17770.2	0.572383	0.437673	1.30779	0.190946	0.428419
SOX11	20.0065	2.38161	1.15828	2.05616	0.0397672	0.181559
LINC00487	17.1535	-0.254656	0.814099	-0.312807	0.754427	0.879859
NRIR	23.9828	-0.906605	0.684931	-1.32364	0.185622	0.422631
CMPK2	1645.44	0.388583	0.62591	0.62083	0.534712	0.740798
RSAD2	869.338	-0.339341	0.560523	-0.6054	0.544913	0.748288
RNF144A-AS1	61.7747	-1.45671	0.588049	-2.47719	0.0132421	0.0940518
RNF144A	1777.42	0.0896137	0.423895	0.211405	0.832571	0.921582
LINC00299	14.1685	-0.971464	0.631404	-1.53858	0.123907	0.340216
LOC101929567	81.4482	1.85971	0.814048	2.28452	0.0223411	0.128467
ID2-AS1	13.3915	0.939218	0.736621	1.27504	0.202297	0.441215
ID2	2566.26	1.39925	0.568489	2.46135	0.0138415	0.0963429
KIDINS220	4942.79	0.143224	0.173848	0.823849	0.410025	0.645361
MBOAT2	1156.8	-0.306661	0.785928	-0.39019	0.696396	0.846745
ASAP2	134.154	-1.37186	0.69051	-1.98674	0.0469512	0.20066
ITGB1BP1	615.383	-0.113713	0.307582	-0.3697	0.711606	0.853983
CPSF3	1155.39	0.410419	0.202044	2.03133	0.0422213	0.18811
IAH1	452.157	0.234277	0.234359	0.999651	0.31748	0.56583
ADAM17	1845.57	0.396037	0.344086	1.15098	0.24974	0.496529
YWHAQ	7201.43	0.418195	0.335379	1.24693	0.212422	0.454109
TAF1B	534.331	-0.39502	0.291998	-1.35282	0.176114	0.41067
GRHL1	100.303	0.960834	0.770234	1.24746	0.21223	0.454102
KLF11	369.116	-1.37755	0.741382	-1.85808	0.063157	0.235367
RRM2	2269.81	-0.494035	0.664127	-0.743886	0.456945	0.684764
C2orf48	130.204	-2.67504	0.642416	-4.16403	3.12675e-05	0.00114272
HPCAL1	600.424	0.137717	0.426213	0.323118	0.746606	0.874798
ODC1	3654.9	0.718083	0.48834	1.47046	0.141438	0.364292
SNORA80B	123.516	-0.501143	0.669401	-0.748644	0.454072	0.682222
NOL10	1137.27	0.53572	0.214644	2.49585	0.0125656	0.0907203
PDIA6	3949.03	1.09097	0.330857	3.29742	0.000975784	0.0159981
PQLC3	368.214	0.590981	0.432672	1.36589	0.171974	0.404771
ROCK2	1682.22	0.176622	0.505565	0.349356	0.726822	0.862784
E2F6	705.26	1.20456	0.342803	3.51386	0.000441644	0.00887519
GREB1	49.3362	-0.68117	0.542362	-1.25593	0.20914	0.450178
LPIN1	2609.95	-0.313208	0.316806	-0.988643	0.322838	0.571365
TRIB2	1597.14	-1.5766	0.655082	-2.40672	0.0160966	0.10597
NBAS	3673.74	0.0057988	0.262237	0.0221128	0.982358	0.992436
DDX1	2045.2	0.307173	0.255322	1.20308	0.228945	0.472994
MYCN	803.382	1.21443	0.993751	1.22207	0.221683	0.465165
FAM49A	948.969	1.0203	0.6354	1.60576	0.108326	0.316574
SMC6	1260.38	0.171204	0.394293	0.434205	0.66414	0.827926
GEN1	1118.19	-0.584228	0.409778	-1.42572	0.15395	0.382651
RDH14	372.561	0.120865	0.257854	0.468735	0.639259	0.813849
LINC00954	72.4802	-2.25344	0.73442	-3.06832	0.00215265	0.027616
TTC32	234.232	0.0500699	0.362105	0.138275	0.890023	0.951276
WDR35	208.092	-0.209273	0.820614	-0.25502	0.798708	0.903714
LAPTM4A	2891.26	1.47714	0.540551	2.73266	0.00628247	0.057264
SDC1	22.4552	-0.347565	0.891222	-0.389986	0.696547	0.846764
PUM2	7106.32	0.0277602	0.250682	0.110739	0.911824	0.961454
RHOB	1007.7	-1.43746	0.706298	-2.0352	0.0418304	0.187131
HS1BP3	268.621	0.804271	0.532993	1.50897	0.131306	0.349934
LDAH	540.586	-0.677091	0.54052	-1.25267	0.210327	0.45197
KLHL29	48.7154	-2.93092	0.935205	-3.13399	0.00172447	0.023662
ATAD2B	3554.9	-0.102471	0.251594	-0.407285	0.683798	0.838687
UBXN2A	866.152	1.27452	0.44275	2.87866	0.00399374	0.042518
MFSD2B	49.4817	0.0253149	0.97422	0.0259848	0.979269	0.990328
C2orf44	349.089	-0.0751688	0.367614	-0.204478	0.83798	0.924566
FKBP1B	48.1956	-0.177257	0.720254	-0.246103	0.805603	0.907741
SF3B6	1678.99	0.87988	0.380472	2.3126	0.0207445	0.122989
FAM228B	185.549	0.494633	0.383694	1.28913	0.197351	0.436357
TP53I3	280.486	-0.0761601	0.307567	-0.247621	0.804427	0.907172
PFN4	15.6591	-1.0288	0.675273	-1.52353	0.127627	0.344999
FAM228A	10.171	-0.955693	0.583697	-1.63731	0.101565	0.305915
ITSN2	4367.28	0.457412	0.332011	1.3777	0.168296	0.399651
NCOA1	2650.45	-0.0340667	0.274905	-0.123922	0.901377	0.956842
PTRHD1	263.758	0.654051	0.451841	1.44753	0.14775	0.373595
CENPO	752.089	-0.605077	0.425208	-1.42302	0.154732	0.383774
ADCY3	1934.27	1.37873	0.469614	2.93588	0.00332602	0.0375047
DNAJC27	650.854	0.280386	0.334814	0.837439	0.402346	0.638657
DNAJC27-AS1	27.1138	-0.575644	0.770879	-0.746737	0.455222	0.683079
EFR3B	50.2991	-0.25422	0.76469	-0.332448	0.739551	0.871134
POMC	34.2195	-0.153571	1.03287	-0.148683	0.881804	0.946807
DNMT3A	2483.42	-0.577096	0.275393	-2.09553	0.0361235	0.171469
DTNB	339.119	-0.0353409	0.297151	-0.118933	0.905329	0.959132
ASXL2	1410.72	0.00681409	0.500754	0.0136076	0.989143	0.995514
KIF3C	395.817	0.414513	0.267734	1.54822	0.121568	0.33645
RAB10	2050.52	0.281922	0.421359	0.669077	0.503447	0.720428
GAREM2	46.8966	-1.77665	0.581932	-3.05302	0.00226552	0.0285061
HADHA	4155.4	0.344747	0.318595	1.08208	0.279215	0.529871
HADHB	1865.84	0.385003	0.305239	1.26131	0.207196	0.447873
ADGRF3	93.3811	-1.64364	0.693611	-2.36969	0.0178032	0.11256
EPT1	2023.46	0.108068	0.286398	0.377337	0.705923	0.851449
SLC35F6	672.103	-0.0647642	0.282791	-0.229017	0.818855	0.915665
CENPA	172.293	-0.973252	0.660905	-1.47261	0.140857	0.36358
MAPRE3	19.8065	-1.04494	0.737713	-1.41645	0.156642	0.385886
TMEM214	425.067	-0.0260624	0.259781	-0.100325	0.920087	0.96443
AGBL5	592.736	0.244665	0.261491	0.935653	0.349452	0.595102
OST4	1298.12	-0.0301836	0.329404	-0.091631	0.926991	0.967817
EMILIN1	45.1155	-0.346961	0.627771	-0.552687	0.580477	0.774038
KHK	67.6638	0.0547056	0.515031	0.106218	0.915409	0.962936
PREB	503.493	0.00630501	0.399921	0.0157656	0.987421	0.995155
SLC5A6	765.648	0.396547	0.242901	1.63255	0.102564	0.307651
ATRAID	743.761	0.189151	0.312826	0.604653	0.545409	0.748288
CAD	1719.6	-0.22309	0.452987	-0.492485	0.622376	0.802633
UCN	25.6743	-0.0688817	0.515142	-0.133714	0.893629	0.953333
MPV17	259.647	0.235943	0.400962	0.588442	0.556235	0.756182
GTF3C2	1227.89	-0.0990473	0.222505	-0.445146	0.656215	0.823821
EIF2B4	320.607	0.128528	0.28112	0.457199	0.647528	0.818862
SNX17	1247.47	0.0586184	0.349469	0.167736	0.866791	0.939291
ZNF513	372.417	0.0318588	0.311116	0.102402	0.918438	0.964199
PPM1G	2104.61	0.540435	0.32452	1.66533	0.095846	0.296051
FTH1P3	61.1153	-0.473874	0.449302	-1.05469	0.291567	0.542301
NRBP1	2112.99	0.269011	0.318085	0.845719	0.39771	0.636178
KRTCAP3	14.2885	-0.129754	0.505835	-0.256514	0.797554	0.903524
IFT172	556.31	-0.580537	0.571118	-1.01649	0.309395	0.557975
ZNF512	1328.84	-0.60759	0.361547	-1.68053	0.0928549	0.290596
CCDC121	79.9934	0.166319	0.569628	0.291977	0.770304	0.889449
GPN1	690.064	0.259999	0.255545	1.01743	0.308949	0.5579
SUPT7L	1923.41	-0.172035	0.223017	-0.771398	0.440471	0.670204
SLC4A1AP	831.894	0.0714469	0.199466	0.358191	0.720201	0.85864
MRPL33	801.886	1.57351	0.429886	3.6603	0.000251919	0.00576628
RBKS	49.8233	1.45815	0.640096	2.27801	0.0227259	0.129561
BRE-AS1	187.474	0.975731	0.729564	1.33742	0.181087	0.416285
BRE	687.529	0.637424	0.394981	1.61381	0.106569	0.313617
FLJ31356	8.99439	0.51543	1.15489	0.446301	0.65538	0.823665
FOSL2	7250.29	1.09517	0.680904	1.60841	0.107745	0.315519
PLB1	196.633	1.78686	0.640191	2.79113	0.00525242	0.0506488
PPP1CB	9137.47	0.284606	0.291013	0.977981	0.328084	0.575811
TRMT61B	374.881	-0.172536	0.221381	-0.779362	0.435767	0.666423
WDR43	3012.68	0.54429	0.255383	2.13127	0.033067	0.162435
FAM179A	80.1678	-0.593785	0.466208	-1.27365	0.202788	0.441973
CLIP4	909.914	-0.537698	0.52996	-1.0146	0.310297	0.558834
YPEL5	8329.29	0.311165	0.531491	0.585456	0.558241	0.757368
LBH	1404.36	-0.62194	0.462332	-1.34522	0.178553	0.413457
LCLAT1	570.654	-0.0257955	0.423814	-0.0608651	0.951467	0.978695
GALNT14	99.805	0.600831	0.805656	0.745766	0.455809	0.68349
CAPN14	80.7876	-0.256435	0.758633	-0.338022	0.735347	0.868711
EHD3	191.893	0.632407	0.611406	1.03435	0.300973	0.550912
MEMO1	1095.5	0.0837644	0.189145	0.442859	0.657868	0.824864
DPY30	249.458	0.120298	0.363843	0.330633	0.740922	0.872011
SPAST	1451.27	0.280919	0.262473	1.07028	0.284494	0.534929
SLC30A6	603.727	-0.388941	0.447821	-0.868518	0.385111	0.627095
NLRC4	64.1509	-0.660097	0.543976	-1.21347	0.224951	0.469115
YIPF4	572.561	-0.0112556	0.381743	-0.0294847	0.976478	0.989531
BIRC6	16668.1	-0.155796	0.214201	-0.727337	0.46702	0.691164
TTC27	673.238	0.199951	0.366922	0.544941	0.585794	0.778125
LTBP1	765.124	1.56917	0.844101	1.85899	0.0630287	0.235118
RASGRP3	870.71	2.14493	0.534339	4.01417	5.96559e-05	0.00187767
FAM98A	556.697	0.436623	0.298245	1.46397	0.143202	0.366698
CRIM1	1236.19	0.953738	0.58301	1.63589	0.101863	0.30645
FEZ2	635.923	0.19989	0.261536	0.764292	0.444693	0.673378
STRN	3111.34	0.13908	0.229123	0.607008	0.543846	0.74754
HEATR5B	2612.73	0.132035	0.276086	0.47824	0.63248	0.809655
GPATCH11	1070.8	1.24197	0.435289	2.8532	0.00432808	0.0448416
EIF2AK2	3371.57	0.0975	0.410234	0.237669	0.812137	0.911749
CEBPZOS	989.452	0.1828	0.449243	0.406906	0.684077	0.838827
CEBPZ	2601.99	0.420111	0.28768	1.46034	0.144195	0.368195
NDUFAF7	410.466	-0.195765	0.26112	-0.749712	0.453428	0.681589
PRKD3	1175.78	-1.2687	0.63914	-1.98501	0.0471434	0.200937
QPCT	142.072	-0.432363	1.05881	-0.408346	0.68302	0.83842
CDC42EP3	2488.03	0.941485	0.474058	1.98601	0.047032	0.200801
LINC00211	42.6386	3.59588	0.738986	4.86596	1.139e-06	7.2977e-05
RMDN2	54.8025	-0.887788	0.763892	-1.16219	0.245158	0.491277
CYP1B1	210.353	-1.43173	0.721807	-1.98354	0.0473077	0.201117
ATL2	2158.05	-0.25536	0.243059	-1.05061	0.293438	0.5438
HNRNPLL	522.268	-2.71658	0.729674	-3.723	0.000196871	0.00478521
GALM	130.51	-2.4691	0.749581	-3.29397	0.000987826	0.0161436
SRSF7	3453.64	-0.320449	0.30624	-1.0464	0.295377	0.545386
GEMIN6	81.8637	-0.35649	0.495475	-0.719492	0.471838	0.695003
DHX57	673.27	-0.222506	0.272884	-0.815385	0.414852	0.649153
MORN2	46.9591	0.818264	0.546185	1.49814	0.134096	0.353487
SOS1	2061.22	-0.157494	0.391392	-0.402396	0.687393	0.840547
MAP4K3	1673.73	0.499247	0.349804	1.42722	0.153516	0.382124
LOC728730	53.3258	-0.31956	0.524699	-0.609035	0.542501	0.746249
TMEM178A	32.2515	-0.455297	0.719282	-0.632988	0.526742	0.734566
THUMPD2	907.808	0.435805	0.327808	1.32945	0.183699	0.420339
SLC8A1-AS1	27.2572	-5.03014	0.806456	-6.23734	4.45078e-10	9.83619e-08
SLC8A1	713.054	-1.61071	0.706532	-2.27974	0.022623	0.129167
EML4	2617.44	-0.791277	0.456806	-1.73219	0.0832392	0.271924
COX7A2L	1883.81	0.182905	0.371795	0.491952	0.622753	0.802854
MTA3	854.464	-2.2426	0.437453	-5.12648	2.95202e-07	2.41734e-05
OXER1	73.7568	-0.430514	0.610494	-0.70519	0.480692	0.701299
HAAO	80.47	1.34386	0.533688	2.51806	0.0118004	0.0869164
ZFP36L2	8623.6	1.2767	0.489035	2.61064	0.00903726	0.0729892
LINC01126	140.808	-0.456366	0.404309	-1.12876	0.259001	0.507431
THADA	2453.33	-0.504654	0.430861	-1.17127	0.241491	0.487793
PLEKHH2	41.3712	-2.38373	0.837194	-2.84728	0.00440939	0.0451646
DYNC2LI1	173.07	-0.176587	0.414584	-0.425938	0.670153	0.830428
LRPPRC	4739.08	0.203267	0.245661	0.827429	0.407994	0.643865
PPM1B	3343.91	0.422684	0.303206	1.39405	0.163303	0.393412
SLC3A1	9.04163	-0.3935	0.566714	-0.694354	0.48746	0.706462
PREPL	1141.62	-0.521782	0.348608	-1.49676	0.134456	0.354072
CAMKMT	85.808	-0.457139	0.319958	-1.42875	0.153077	0.381584
SRBD1	1407.64	-0.55811	0.402106	-1.38797	0.165147	0.395693
PRKCE	1055.25	0.0243123	0.403142	0.0603071	0.951911	0.978887
EPAS1	442.087	-1.77769	0.595054	-2.98745	0.00281316	0.0334715
ATP6V1E2	39.5539	-0.183886	0.423182	-0.434533	0.663902	0.8279
RHOQ	1123.27	0.420488	0.351704	1.19557	0.231863	0.477113
PIGF	189.286	0.273469	0.546364	0.500525	0.616705	0.798986
CRIPT	1739.18	-0.0168966	0.292634	-0.0577398	0.953956	0.97949
SOCS5	1849.73	0.709836	0.441591	1.60745	0.107956	0.315904
MCFD2	2206.86	0.467757	0.302993	1.54379	0.12264	0.338132
TTC7A	3098.29	-0.342823	0.343039	-0.999373	0.317614	0.565932
C2orf61	15.0386	-0.617132	0.664121	-0.929247	0.352761	0.598077
CALM2	8121.31	-0.0883471	0.333562	-0.26486	0.791117	0.900698
EPCAM	140.499	0.0022346	1.14921	0.00194446	0.998449	0.998997
MSH2	1589.65	-0.467578	0.374494	-1.24856	0.211826	0.453664
MSH6	3102.8	0.117471	0.28247	0.415869	0.677506	0.83478
FBXO11	4461.42	0.364596	0.372186	0.979606	0.327281	0.574917
FOXN2	3425.23	0.402992	0.27689	1.45542	0.145552	0.370423
PPP1R21	842.946	-0.650581	0.455118	-1.42948	0.152867	0.381309
STON1	130.258	-1.5247	0.483564	-3.15305	0.00161575	0.0226991
ASB3	808.217	-0.36624	0.23999	-1.52607	0.126994	0.34443
GPR75-ASB3	36.0885	-0.450883	0.738385	-0.610635	0.541442	0.745796
CHAC2	93.504	0.0952358	0.604671	0.1575	0.874851	0.943694
ERLEC1	1103.85	0.67363	0.30826	2.18527	0.0288694	0.149676
GPR75	126.724	-0.70441	0.449601	-1.56674	0.117175	0.330137
PSME4	6859.44	0.652818	0.450861	1.44794	0.147634	0.373567
ACYP2	57.1962	-0.224589	0.276397	-0.812558	0.416471	0.650559
SPTBN1	30082.8	-0.82612	0.438412	-1.88435	0.0595181	0.227379
EML6	234.319	-0.451905	0.706939	-0.639242	0.522665	0.732561
RTN4	5984.26	0.406678	0.241955	1.6808	0.0928019	0.29049
CLHC1	240.376	-0.641705	0.554052	-1.1582	0.246782	0.493016
RPS27A	21356.4	0.753317	0.472509	1.59429	0.110871	0.320893
MTIF2	794.585	0.356876	0.215491	1.65611	0.0976993	0.299034
PRORSD1P	165.158	0.331091	0.417499	0.793035	0.427757	0.660374
CCDC88A	9753.35	0.240517	0.312495	0.769666	0.441498	0.671033
CFAP36	340.62	-0.223267	0.363158	-0.614792	0.538692	0.743823
PPP4R3B	3847.6	-0.223889	0.186644	-1.19955	0.230313	0.47486
PNPT1	1254.9	0.292051	0.348389	0.838291	0.401867	0.63844
VRK2	713.592	0.692703	0.266867	2.59569	0.00944016	0.0747749
FANCL	664.461	0.0870411	0.349044	0.24937	0.803075	0.906558
LINC01122	44.6303	1.06312	0.909792	1.16853	0.242592	0.488919
BCL11A	892.648	0.853947	0.691998	1.23403	0.217192	0.4602
PAPOLG	1050.95	-0.105016	0.291925	-0.359736	0.719044	0.857957
REL	4958.43	0.396438	0.466587	0.849655	0.395517	0.634761
PUS10	343.436	-0.957271	0.47023	-2.03575	0.0417754	0.187049
PEX13	1197.06	0.3898	0.342258	1.1389	0.254743	0.502496
KIAA1841	326.445	-0.236669	0.413476	-0.572388	0.567059	0.764584
LOC339803	70.0884	-0.715785	0.705554	-1.0145	0.310344	0.558834
C2orf74	51.5192	0.0599596	0.53624	0.111815	0.91097	0.961318
AHSA2	2455.93	-0.94683	0.401323	-2.35927	0.0183108	0.114707
USP34	10189	-0.280088	0.25682	-1.0906	0.275448	0.527041
XPO1	9481.43	0.260318	0.2795	0.93137	0.351662	0.597136
FAM161A	128.846	-0.0727152	0.44427	-0.163673	0.869988	0.940961
CCT4	2675.63	0.344098	0.273505	1.25811	0.208353	0.449205
COMMD1	227.458	0.236985	0.283233	0.836713	0.402754	0.638841
B3GNT2	5363.08	0.888089	0.480476	1.84835	0.0645516	0.237787
TMEM17	33.0718	0.862054	0.598265	1.44092	0.149606	0.376239
EHBP1	1043.94	0.118009	0.453915	0.25998	0.79488	0.902664
OTX1	37.2541	0.84699	0.731461	1.15794	0.246887	0.493034
DBIL5P2	16.3062	-0.87152	0.65051	-1.33975	0.180327	0.415645
WDPCP	522.028	-0.29675	0.35748	-0.830115	0.406474	0.642545
MDH1	1614.44	0.0967322	0.333456	0.29009	0.771747	0.89016
UGP2	3126.93	-0.81229	0.426026	-1.90667	0.0565635	0.221637
VPS54	1039.18	-0.108691	0.206472	-0.52642	0.598596	0.786933
PELI1	2047.95	-3.36043	0.762488	-4.4072	1.04717e-05	0.000467501
LOC100507006	51.0316	0.172858	0.826946	0.209032	0.834424	0.922873
LGALSL	123.201	-0.16235	0.74448	-0.218072	0.827373	0.919219
AFTPH	3774.75	1.0367	0.278091	3.72793	0.000193062	0.00473018
SERTAD2	5462.93	0.731633	0.415962	1.75889	0.0785955	0.263933
SLC1A4	1618.27	-0.117907	0.466844	-0.252562	0.800606	0.905002
CEP68	1550.7	-0.359427	0.37651	-0.954626	0.339767	0.587362
RAB1A	2889.96	0.608636	0.384868	1.58141	0.113783	0.32525
ACTR2	8243.99	0.37979	0.338504	1.12197	0.261877	0.51143
SPRED2	566.985	-0.597721	0.556221	-1.07461	0.282549	0.532841
MEIS1	3082.76	0.820524	0.74645	1.09923	0.271666	0.522878
ETAA1	915.373	0.0427988	0.236939	0.180632	0.856656	0.934692
C1D	766.269	0.654961	0.359961	1.81953	0.06883	0.245743
WDR92	158.598	-0.590571	0.379407	-1.55656	0.119574	0.333892
PNO1	488.446	0.420961	0.306806	1.37207	0.17004	0.401949
PPP3R1	4104.91	1.08737	0.333915	3.25642	0.00112828	0.0177934
CNRIP1	50.3015	-1.66619	0.725617	-2.29623	0.0216625	0.12598
PLEK	5324.63	1.61605	0.66031	2.44742	0.0143885	0.0989362
FBXO48	59.6552	-0.437341	0.554646	-0.788505	0.430401	0.662283
APLF	429.9	-0.50513	0.338142	-1.49384	0.135217	0.355299
ARHGAP25	1637.93	0.0927765	0.400365	0.231729	0.816748	0.914378
ANTXR1	285.116	-4.36013	1.0731	-4.06312	4.84203e-05	0.0015859
GFPT1	2613.4	0.36563	0.335716	1.0891	0.276108	0.527517
NFU1	292.212	0.622031	0.277145	2.24443	0.0248048	0.13624
AAK1	3391.74	-0.183056	0.37335	-0.490307	0.623917	0.803761
ANXA4	352.035	1.00224	0.507284	1.97569	0.0481897	0.203119
GMCL1	611.052	-0.0324606	0.252028	-0.128798	0.897518	0.955382
SNRNP27	813.203	0.198319	0.272107	0.728826	0.466108	0.690694
MXD1	2917.43	-0.0189632	0.495488	-0.0382718	0.969471	0.986164
ASPRV1	67.6697	-1.16113	0.345329	-3.36239	0.000772704	0.0135537
PCBP1-AS1	120.265	-1.0077	0.356729	-2.82483	0.0047305	0.0471296
PCBP1	2955.83	0.267757	0.318149	0.841609	0.400007	0.637709
C2orf42	275.15	-0.226517	0.301649	-0.75093	0.452695	0.681021
TIA1	4072.77	-0.662442	0.362187	-1.829	0.067399	0.242614
PCYOX1	579.876	0.267599	0.401206	0.666987	0.504781	0.721122
SNRPG	825.76	0.77123	0.318575	2.42087	0.0154834	0.10331
FAM136A	1149.41	0.26164	0.244035	1.07215	0.283655	0.534137
TGFA	190.976	0.96328	0.809322	1.19023	0.233955	0.479336
ADD2	896.695	0.870143	1.19998	0.725131	0.468372	0.692429
TEX261	1065.58	0.610967	0.293321	2.08293	0.0372579	0.174956
NAGK	357.453	-0.172494	0.496231	-0.347609	0.728134	0.864134
MCEE	89.93	0.472364	0.332384	1.42114	0.155276	0.384376
MPHOSPH10	940.304	0.39192	0.263906	1.48507	0.137525	0.35931
PAIP2B	260.402	-0.127265	0.718915	-0.177023	0.85949	0.936276
ZNF638	5815.31	-0.516576	0.383377	-1.34744	0.17784	0.412818
DYSF	849.079	-2.49477	0.650479	-3.83528	0.000125421	0.00338726
EXOC6B	121.857	-0.10067	0.678794	-0.148307	0.8821	0.946882
SFXN5	622.487	0.288076	0.402019	0.716573	0.473638	0.695958
RAB11FIP5	112.269	-1.51634	0.837159	-1.8113	0.0700949	0.248004
SMYD5	567.861	0.103004	0.269327	0.382449	0.702129	0.849616
PRADC1	143.986	0.416558	0.477547	0.872286	0.383052	0.625075
CCT7	2797.27	0.281491	0.356298	0.790043	0.429502	0.661534
FBXO41	1460.03	-0.417077	0.364796	-1.14332	0.252907	0.500035
ALMS1	5916.37	-0.555387	0.265099	-2.09502	0.0361696	0.171635
ALMS1-IT1	172.03	-0.0563538	0.391665	-0.143883	0.885593	0.94832
ALMS1P1	21.0513	-1.03653	0.562773	-1.84182	0.0655014	0.239348
TPRKB	438.195	0.566601	0.389025	1.45646	0.145265	0.369939
DUSP11	827.352	0.610684	0.306442	1.99282	0.0462814	0.198629
STAMBP	948.926	-0.271845	0.163108	-1.66665	0.0955833	0.295822
DGUOK	342.148	-0.101104	0.336292	-0.300645	0.763685	0.885195
DGUOK-AS1	31.1625	-1.21984	0.610142	-1.99927	0.0455793	0.196773
TET3	4177.62	0.117231	0.248098	0.472517	0.636558	0.812165
BOLA3	146.201	0.956773	0.565922	1.69064	0.0909049	0.287075
BOLA3-AS1	93.344	-0.540615	0.749896	-0.72092	0.470959	0.694176
MOB1A	12458	0.683063	0.342337	1.99529	0.046011	0.198023
MTHFD2	1237.19	0.989411	0.328346	3.01332	0.00258407	0.0313548
SLC4A5	271.992	-0.827333	0.441136	-1.87546	0.0607298	0.230358
DCTN1	2481.7	-0.193783	0.217789	-0.889772	0.373589	0.616594
C2orf81	23.1094	-0.816402	0.533319	-1.5308	0.12582	0.342757
WDR54	161.208	-1.01844	0.473294	-2.15181	0.0314125	0.157134
RTKN	145.401	-1.14095	0.481845	-2.36788	0.0178905	0.112945
INO80B	406.164	-0.0103119	0.281094	-0.036685	0.970736	0.986465
WBP1	713.45	-0.129199	0.350433	-0.368685	0.712363	0.854556
MOGS	1161.26	-0.109753	0.265005	-0.414153	0.678762	0.835991
MRPL53	182.796	-0.111209	0.382231	-0.290948	0.771091	0.889806
CCDC142	234.48	-0.798639	0.453933	-1.75938	0.0785135	0.263775
TTC31	534.881	-0.390433	0.337844	-1.15566	0.24782	0.493995
LBX2	34.0955	-0.0686762	0.759977	-0.0903662	0.927996	0.968486
LBX2-AS1	60.5672	0.148241	0.520585	0.284758	0.775829	0.892073
PCGF1	251.809	0.824028	0.493261	1.67057	0.0948063	0.294656
DQX1	7.19872	-1.1838	0.707462	-1.6733	0.0942679	0.293519
AUP1	2347.88	0.248811	0.24729	1.00615	0.314342	0.562788
HTRA2	758.444	-0.174287	0.254062	-0.686004	0.492711	0.711744
LOXL3	108.636	1.17254	0.440072	2.66443	0.0077119	0.0659741
DOK1	474.248	1.23884	0.38489	3.21868	0.00128784	0.0195448
M1AP	45.5789	1.54195	0.710748	2.16947	0.0300468	0.153063
SEMA4F	150.89	-0.578275	0.565252	-1.02304	0.306289	0.555924
HK2	2282.63	0.746497	0.504844	1.47867	0.139229	0.361786
POLE4	235.807	0.186285	0.478736	0.389118	0.697189	0.847037
TACR1	18.3198	-1.52296	1.04123	-1.46265	0.143563	0.367253
MRPL19	1418.47	0.0888815	0.268692	0.330793	0.740801	0.871946
GCFC2	629.58	-0.850782	0.338459	-2.51369	0.0119475	0.0875785
SUCLG1	872.597	0.181536	0.236799	0.766623	0.443305	0.672579
DNAH6	143.178	-1.53903	0.718174	-2.14298	0.0321148	0.159347
TRABD2A	142.144	-0.318228	0.669974	-0.474986	0.634797	0.810797
TMSB10	14259	0.310245	0.403055	0.769734	0.441457	0.671033
KCMF1	1687.8	0.632864	0.324288	1.95155	0.0509919	0.210485
TCF7L1	46.6489	-0.735741	1.18172	-0.622603	0.533545	0.739696
TGOLN2	9993.97	0.27131	0.223646	1.21312	0.225084	0.46921
RETSAT	466.875	-0.0194138	0.259789	-0.0747289	0.94043	0.973893
ELMOD3	239.604	-0.30958	0.326263	-0.948867	0.342688	0.589285
CAPG	2997.24	0.806727	0.53457	1.50911	0.13127	0.349934
PARTICL	118.22	0.312927	0.306357	1.02145	0.307042	0.556557
MAT2A	5047.62	-0.368176	0.412785	-0.891933	0.372429	0.615779
GGCX	613.354	-0.171622	0.316732	-0.541852	0.58792	0.779696
VAMP8	1303.5	1.6351	0.435366	3.75569	0.000172862	0.00432521
VAMP5	109.92	-0.670079	0.431635	-1.55242	0.120562	0.335134
RNF181	584.375	0.580314	0.36717	1.5805	0.113991	0.325528
TMEM150A	69.1244	0.136459	0.417377	0.326944	0.743711	0.873499
USP39	1478.9	0.434588	0.343514	1.26512	0.205827	0.445883
C2orf68	1295.83	-0.42712	0.22549	-1.89419	0.0581998	0.225264
GNLY	369.29	-0.339271	0.745663	-0.454992	0.649115	0.819559
ATOH8	20.7938	0.966037	0.883734	1.09313	0.274336	0.525674
ST3GAL5	438.903	-0.527229	0.426085	-1.23738	0.215946	0.458701
ST3GAL5-AS1	14.5489	-1.4007	0.682839	-2.0513	0.0402381	0.18273
LOC90784	257.914	0.133246	0.304294	0.437885	0.66147	0.826392
POLR1A	1257.72	0.0864588	0.324722	0.266255	0.790043	0.900143
PTCD3	2955.82	-0.44439	0.18204	-2.44117	0.0146396	0.0999899
SNORD94	795.104	0.629364	0.586934	1.07229	0.283589	0.534126
IMMT	1618.05	-0.0457744	0.261539	-0.175019	0.861065	0.93707
MRPL35	560.31	0.253187	0.360731	0.70187	0.48276	0.703244
REEP1	18.6668	-0.619714	0.931062	-0.665599	0.505668	0.721191
KDM3A	6790.92	0.404759	0.42439	0.953743	0.340214	0.587537
CHMP3	1276.48	0.459103	0.250194	1.83499	0.0665078	0.241392
RNF103-CHMP3	25.8084	-1.50867	0.957457	-1.5757	0.115095	0.327349
RNF103	2843.16	0.441845	0.424655	1.04048	0.298117	0.548092
RMND5A	5972.27	0.319689	0.32777	0.975345	0.329389	0.576946
CD8A	827.322	-1.84534	0.715734	-2.57825	0.00993007	0.0774594
CD8B	58.5617	-0.735007	0.685244	-1.07262	0.283441	0.533932
ANAPC1P1	18.5516	-2.68469	0.708138	-3.7912	0.000149924	0.00389115
RGPD2	5856.82	-6.50262	0.891784	-7.2917	3.06069e-13	2.13038e-10
RGPD1	2897.07	-5.19818	0.65259	-7.96546	1.64614e-15	2.52074e-12
PLGLB1	333.288	-1.69374	0.583596	-2.90224	0.00370503	0.0404672
LOC285074	2512.96	-0.262459	0.392603	-0.66851	0.503808	0.720469
LINC00152	334.277	1.61485	0.533966	3.02425	0.00249254	0.0305346
KRCC1	364.449	-0.745361	0.524432	-1.42127	0.155238	0.384342
EIF2AK3	1954.72	0.205006	0.446424	0.459219	0.646077	0.818108
RPIA	929.276	0.180937	0.333989	0.541747	0.587993	0.779696
ANKRD36BP2	132.508	-0.806617	0.798881	-1.00968	0.312647	0.56151
LOC654342	15.5942	-0.295324	0.669775	-0.44093	0.659264	0.825589
ANKRD20A8P	58.6873	-3.34678	1.17627	-2.84525	0.00443767	0.0452842
MAL	408.971	-4.7649	0.797889	-5.97188	2.34536e-09	4.12811e-07
MRPS5	892.915	-0.000718087	0.227457	-0.00315702	0.997481	0.998655
ZNF514	948.897	-0.101337	0.446615	-0.2269	0.820502	0.916482
ZNF2	77.3881	-0.0944633	0.731361	-0.129161	0.89723	0.955382
PROM2	31.221	-0.425019	0.696881	-0.609888	0.541936	0.74601
KCNIP3	37.3209	-1.5817	1.07437	-1.47222	0.140961	0.363635
FAHD2A	257.381	-0.466667	0.316922	-1.4725	0.140887	0.36358
LINC00342	2982.9	-1.38009	0.510213	-2.70494	0.00683169	0.0608927
ANKRD36C	10256.3	-0.752383	0.45067	-1.66948	0.0950229	0.29498
FAHD2CP	55.1342	-0.171973	0.397347	-0.432804	0.665157	0.828266
ADRA2B	21.3289	-1.18562	0.771438	-1.53689	0.12432	0.340618
ASTL	13.7408	-2.69147	0.80807	-3.33073	0.000866177	0.0147212
DUSP2	977.51	-0.692516	0.5729	-1.20879	0.226743	0.47118
STARD7	3052.03	0.664909	0.273031	2.43528	0.0148801	0.100863
STARD7-AS1	139.928	-0.31749	0.32917	-0.964516	0.334787	0.582767
TMEM127	2170.8	0.830936	0.405411	2.04961	0.0404022	0.183245
CIAO1	1916.04	0.175804	0.145715	1.20649	0.227627	0.472051
SNRNP200	11056.7	-0.114632	0.219059	-0.523292	0.600771	0.787698
ITPRIPL1	120.619	0.2705	0.35336	0.765509	0.443968	0.673006
NCAPH	756.599	-0.564755	0.544331	-1.03752	0.299493	0.549599
ARID5A	2144.44	0.641354	0.643766	0.996253	0.319127	0.567729
KANSL3	3568.31	0.0525186	0.312052	0.168301	0.866347	0.939271
LMAN2L	216.417	-0.297228	0.405348	-0.733265	0.463397	0.688932
CNNM4	674.022	0.279534	0.427015	0.654625	0.512709	0.726014
CNNM3	777.103	-0.292295	0.372224	-0.785268	0.432296	0.664019
ANKRD23	227.143	-0.748919	0.402349	-1.86137	0.0626925	0.234492
ANKRD39	146.205	0.106427	0.299735	0.355071	0.722536	0.85978
SEMA4C	244.051	1.34223	0.581709	2.3074	0.0210327	0.124065
FAM178B	46.5526	-2.53797	1.03979	-2.44084	0.0146533	0.100038
[truncated: 13,314 more rows]
