# Supplementary material for: Genomic and Global Gene Expression Profiling in Pediatric and Young Adult Acute Leukemia with PICALM::MLLT10 Fusion
Source: Research Square preprint supplement (doi:10.21203/rs.3.rs-3348788/v1), 2023-09-20
Supplement: Supplementary file 3 [file d0830decc877edd207eedd50.xlsx]

## Sheet: Supplementary Table S3_Fianl
	ID	Description	GeneRatio	BgRatio	pvalue	p.adjust	qvalue	geneID	Count
1	GO:0042110	T cell activation	63/735	455/11964	7.81e-10	3.43e-06	3.18e-06	TNFRSF14/LCK/PIK3R3/CD2/RORC/SH2D2A/CD1D/CD1C/SLAMF6/IL10/CR1/PELI1/ZAP70/DPP4/CD28/ICOS/IGFBP2/SLC11A1/CCR9/HES1/LEF1/IL7R/CAMK4/TCF7/ITK/IRF4/BTN3A1/HLA-DOB/FYN/ARG1/CARD11/SIT1/CTSL/CD24/PRKCQ/GATA3/ZEB1/RAG1/RAG2/CD6/CD5/CCDC88B/JAML/CD3E/CD3D/CD3G/CD27/CLEC4A/CLEC7A/TESPA1/PAWR/LIG4/BCL11B/RASGRP1/RORA/NLRC3/LAT/NOD2/PIK3R6/IKZF3/CLC/SIRPG/ADORA2A	63
2	GO:0002250	adaptive immune response	53/735	364/11964	3.15e-09	6.92e-06	6.41e-06	TNFRSF14/RORC/CD1D/CD1C/SLAMF6/IL10/CR2/CR1/SUSD4/ZAP70/CD28/SLC11A1/SLC22A13/TRAT1/LEF1/IL7R/CAMK4/ITK/IRF4/BTN3A1/C2/HLA-DOB/BACH2/FYN/ARG1/SIT1/CTSL/TLR8/SH2D1A/IL9R/PRKCQ/GATA3/RAG1/CD6/CD3E/CD3D/CD3G/JAM3/CD27/CLEC4A/CLEC7A/LIG4/RORA/IL21R/LAT/NOD2/CLEC10A/SKAP1/C3/CLC/CD79A/LILRA6/LIME1	53
3	GO:0002768	immune response-regulating cell surface receptor signaling pathway	41/735	263/11964	2.89e-08	4.23e-05	3.92e-05	LCK/GBP1/CR2/CR1/PELI1/ZAP70/CD28/LTF/TRAT1/GCSAM/CD200R1/ITK/BTN3A1/NCR3/FYN/CARD11/PVRIG/PTK2/DAB2IP/SH2D1A/CD24/PRKCQ/GATA3/CD3E/CD3D/CD3G/CLEC7A/CACNB3/TESPA1/PAWR/NOD2/SKAP1/FFAR2/CD79A/C5AR1/FPR1/PLCG1/LIME1/UBASH3A/PLA2G6/NFAM1	41
4	GO:0002429	immune response-activating cell surface receptor signaling pathway	38/735	241/11964	6.86e-08	7.55e-05	6.99e-05	LCK/GBP1/CR2/CR1/PELI1/ZAP70/CD28/LTF/TRAT1/GCSAM/ITK/BTN3A1/NCR3/FYN/CARD11/PVRIG/PTK2/DAB2IP/SH2D1A/GATA3/CD3E/CD3D/CD3G/CLEC7A/CACNB3/TESPA1/PAWR/NOD2/SKAP1/FFAR2/CD79A/C5AR1/FPR1/PLCG1/LIME1/UBASH3A/PLA2G6/NFAM1	38
5	GO:0050863	regulation of T cell activation	43/735	310/11964	3.99e-07	0.000350627	0.000324761	TNFRSF14/LCK/CD2/CD1D/IL10/CR1/PELI1/ZAP70/DPP4/CD28/ICOS/IGFBP2/HES1/LEF1/IL7R/CAMK4/TCF7/IRF4/HLA-DOB/FYN/ARG1/CARD11/SIT1/CD24/PRKCQ/GATA3/ZEB1/RAG1/RAG2/CD6/CD5/CCDC88B/CD3E/CD27/TESPA1/PAWR/RASGRP1/LAT/NOD2/PIK3R6/CLC/SIRPG/ADORA2A	43
6	GO:0006959	humoral immune response	24/735	125/11964	4.98e-07	0.000365035	0.000338106	CFH/CR2/CR1/SUSD4/CD28/SLC11A1/LTF/CAMP/CXCL1/C2/DEFA4/DEFA1/DEFA1B/DEFA3/SH2D1A/GATA3/ALOX5/POU2AF1/A2M/KRT1/NOD2/C3/PGLYRP1/PLA2G6	24
7	GO:0002227	innate immune response in mucosa	7/735	11/11964	8.53e-07	0.00053553	0.000496024	LTF/CAMP/DEFA4/DEFA1/DEFA1B/DEFA3/NOD2	7
8	GO:0002253	activation of immune response	49/735	396/11964	1.96e-06	0.00107842	0.000998867	LCK/GBP1/CFH/CR2/CR1/SUSD4/PELI1/ZAP70/CD28/LTF/TRAT1/GCSAM/TLR2/ITK/IRF4/BTN3A1/NCR3/C2/FYN/CARD11/PVRIG/PTK2/DAB2IP/TLR8/SH2D1A/GATA3/RBM14/CD3E/CD3D/CD3G/A2M/CLEC7A/CACNB3/KRT1/TESPA1/PAWR/NOD2/SKAP1/MAP2K6/C3/FFAR2/CD79A/C5AR1/FPR1/PLCG1/LIME1/UBASH3A/PLA2G6/NFAM1	49
9	GO:0002385	mucosal immune response	8/735	17/11964	2.89e-06	0.00141189	0.00130773	LTF/CAMP/DEFA4/DEFA1/DEFA1B/DEFA3/NOD2/FFAR2	8
10	GO:0033077	T cell differentiation in thymus	16/735	70/11964	3.81e-06	0.00152636	0.00141376	ZAP70/CD28/IL7R/CAMK4/CARD11/GATA3/ZEB1/RAG1/RAG2/CD3E/CD3D/CD3G/TESPA1/LIG4/BCL11B/RASGRP1	16
11	GO:0050852	T cell receptor signaling pathway	22/735	121/11964	3.82e-06	0.00152636	0.00141376	LCK/GBP1/ZAP70/CD28/TRAT1/ITK/BTN3A1/FYN/CARD11/PVRIG/SH2D1A/GATA3/CD3E/CD3D/CD3G/CACNB3/TESPA1/PAWR/SKAP1/PLCG1/LIME1/UBASH3A	22
12	GO:1903037	regulation of leukocyte cell-cell adhesion	40/735	305/11964	4.22e-06	0.00154756	0.0014334	TNFRSF14/LCK/CD1D/IL10/CR1/PELI1/ZAP70/DPP4/CD28/ICOS/IGFBP2/HES1/LEF1/IL7R/ADTRP/HLA-DOB/FYN/ARG1/CARD11/KLF4/CD24/PRKCQ/GATA3/ALOX5/RAG1/RAG2/CD6/CD5/CCDC88B/CD3E/ETS1/CD27/TESPA1/PAWR/RASGRP1/NOD2/PIK3R6/SKAP1/SIRPG/ADORA2A	40
13	GO:0045058	T cell selection	12/735	43/11964	6.92e-06	0.00221751	0.00205393	CD1D/SLAMF6/ZAP70/CD28/IRF4/CARD11/CTSL/GATA3/CD3E/CD3D/CD3G/BCL11B	12
14	GO:0002764	immune response-regulating signaling pathway	45/735	368/11964	7.06e-06	0.00221751	0.00205393	LCK/GBP1/CR2/CR1/PELI1/ZAP70/CD28/LTF/TRAT1/GCSAM/CD200R1/TLR2/ITK/IRF4/BTN3A1/NCR3/FYN/CARD11/PVRIG/PTK2/DAB2IP/TLR8/SH2D1A/CD24/PRKCQ/GATA3/CD3E/CD3D/CD3G/CLEC7A/CACNB3/TESPA1/PAWR/NOD2/SKAP1/MAP2K6/FFAR2/CD79A/C5AR1/FPR1/PLCG1/LIME1/UBASH3A/PLA2G6/NFAM1	45
15	GO:0002251	organ or tissue specific immune response	8/735	19/11964	8.05e-06	0.00227637	0.00210844	LTF/CAMP/DEFA4/DEFA1/DEFA1B/DEFA3/NOD2/FFAR2	8
16	GO:0007159	leukocyte cell-cell adhesion	42/735	336/11964	8.28e-06	0.00227637	0.00210844	TNFRSF14/LCK/CD1D/IL10/CR1/PELI1/ZAP70/DPP4/CD28/ICOS/IGFBP2/PODXL2/HES1/LEF1/IL7R/ADTRP/HLA-DOB/FYN/ARG1/CARD11/KLF4/CD24/PRKCQ/GATA3/ALOX5/RAG1/RAG2/CD6/CD5/CCDC88B/CD3E/ETS1/CD27/OLR1/TESPA1/PAWR/RASGRP1/NOD2/PIK3R6/SKAP1/SIRPG/ADORA2A	42
17	GO:0051249	regulation of lymphocyte activation	49/735	422/11964	1.17e-05	0.00301548	0.00279303	TNFRSF14/LCK/CD2/CD1D/IL10/CR1/PELI1/ZAP70/DPP4/CD28/ICOS/IGFBP2/HES1/LEF1/IL7R/CAMK4/TCF7/MZB1/IRF4/HLA-DOB/FYN/ARG1/CARD11/SIT1/CD24/PRKCQ/GATA3/ZEB1/RAG1/RAG2/CD6/CD5/CCDC88B/TBC1D10C/CD3E/CD27/CLEC7A/TESPA1/PAWR/RASGRP1/LAT/NOD2/PIK3R6/IKZF3/CLC/PGLYRP1/SIRPG/ADORA2A/NFAM1	49
18	GO:0007186	G protein-coupled receptor signaling pathway	51/735	447/11964	1.26e-05	0.00307259	0.00284593	GPR153/ECE1/ADGRB2/PTGER3/S1PR1/CELSR2/SORT1/GPR17/PPARG/CCR9/CXCL1/HOMER1/PDGFRB/GABBR1/ITPR3/VIPR2/RIMS2/GPRASP1/NMT2/PARD3/GRK5/PTGDR2/CD3E/DGKA/RIC8B/HCAR2/HCAR3/HCAR1/CYSLTR2/KCTD12/PTGDR/AKAP5/TSHR/GPR68/SLC24A4/ADGRG1/ADGRG3/PIK3R6/PIK3R5/CDK5R1/GNGT2/RGS9/PRKCA/C3/ADGRL1/GIPC1/FFAR2/C5AR1/FPR1/ADORA2A/CELSR1	51
19	GO:0002694	regulation of leukocyte activation	55/735	496/11964	1.33e-05	0.00307259	0.00284593	TNFRSF14/LCK/CD2/CD1D/IL10/CR1/PELI1/ZAP70/DPP4/CD28/ICOS/FN1/IGFBP2/HES1/LEF1/IL7R/CAMK4/TCF7/MZB1/IRF4/HLA-DOB/FYN/ARG1/ENPP3/CARD11/SIT1/CD24/PRKCQ/GATA3/ZEB1/RAG1/RAG2/CD6/CD5/CCDC88B/TBC1D10C/MMP8/CD3E/CD27/CLEC7A/LRRK2/TESPA1/PAWR/RASGRP1/RORA/LAT/NOD2/PIK3R6/IKZF3/CLC/PGLYRP1/SIRPG/BPI/ADORA2A/NFAM1	55
20	GO:0002757	immune response-activating signaling pathway	42/735	345/11964	1.59e-05	0.00343333	0.00318005	LCK/GBP1/CR2/CR1/PELI1/ZAP70/CD28/LTF/TRAT1/GCSAM/TLR2/ITK/IRF4/BTN3A1/NCR3/FYN/CARD11/PVRIG/PTK2/DAB2IP/TLR8/SH2D1A/GATA3/CD3E/CD3D/CD3G/CLEC7A/CACNB3/TESPA1/PAWR/NOD2/SKAP1/MAP2K6/FFAR2/CD79A/C5AR1/FPR1/PLCG1/LIME1/UBASH3A/PLA2G6/NFAM1	42
21	GO:1903039	positive regulation of leukocyte cell-cell adhesion	32/735	234/11964	1.64e-05	0.00343333	0.00318005	TNFRSF14/LCK/CD1D/CR1/ZAP70/DPP4/CD28/ICOS/IGFBP2/HES1/LEF1/IL7R/HLA-DOB/FYN/CARD11/CD24/PRKCQ/GATA3/ALOX5/RAG1/CD6/CD5/CCDC88B/CD3E/ETS1/CD27/TESPA1/RASGRP1/NOD2/PIK3R6/SKAP1/SIRPG	32
22	GO:0000904	cell morphogenesis involved in differentiation	51/735	453/11964	1.82e-05	0.00349314	0.00323545	ECE1/CELSR2/TRIM46/ABI2/RAPH1/MAP2/FN1/PLXNB1/LAMB2/PLXNA1/ARHGEF26/HES1/RUFY3/SPP1/LEF1/FAT1/CYFIP2/SYNGAP1/FYN/UST/TIAM2/SEMA3C/EPHB6/SDC2/PTK2/NPR2/SLITRK4/PRKCQ/GATA3/PARD3/CDH23/CDHR1/SLIT1/SHTN1/LRP4/FAT3/DSCAML1/ROBO3/ST14/LRRK2/RILPL1/ATP8A2/FARP1/BCL11B/CDK5R1/CNTNAP1/TBCD/CDH2/NOTCH3/ARHGAP33/BRSK1	51
23	GO:0098703	calcium ion import across plasma membrane	10/735	33/11964	1.83e-05	0.00349314	0.00323545	SCN3A/SCN2A/SCN9A/FYN/SCN8A/AKAP5/SLC24A4/CACNA1H/TRPV1/CACNA1I	10
24	GO:0050851	antigen receptor-mediated signaling pathway	25/735	164/11964	2.18e-05	0.00399743	0.00370254	LCK/GBP1/ZAP70/CD28/TRAT1/GCSAM/ITK/BTN3A1/FYN/CARD11/PVRIG/SH2D1A/GATA3/CD3E/CD3D/CD3G/CACNB3/TESPA1/PAWR/SKAP1/CD79A/PLCG1/LIME1/UBASH3A/NFAM1	25
25	GO:0019731	antibacterial humoral response	8/735	22/11964	2.89e-05	0.0050525	0.00467978	LTF/CAMP/DEFA4/DEFA1/DEFA1B/DEFA3/NOD2/PLA2G6	8
26	GO:0050803	regulation of synapse structure or activity	25/735	167/11964	2.99e-05	0.0050525	0.00467978	IL10/TANC1/ABI2/LRRN1/COLQ/PTPN13/TLR2/HOMER1/SYNGAP1/LRFN2/FYN/DAB2IP/SLITRK4/SLIT1/LRP4/CLSTN3/LRRK2/FARP1/NTRK3/CDK5R1/CNTNAP1/CDH2/ADGRL1/ARHGAP33/DMPK	25
27	GO:1903131	mononuclear cell differentiation	45/735	390/11964	3.1e-05	0.00505495	0.00468205	LCK/PIK3R3/CD2/RORC/CD1D/SLAMF6/IL10/CR2/CR1/BATF3/ZAP70/CD28/PPARG/CCR9/LEF1/IL7R/CAMK4/TCF7/ITK/IRF4/CARD11/TMEM176B/TPD52/CTSL/GATA3/ZEB1/RAG1/RAG2/POU2AF1/CD3E/CD3D/CD3G/CD27/TESPA1/LIG4/GPR68/BCL11B/RASGRP1/RORA/ADGRG3/PIK3R6/IKZF3/CD79A/PGLYRP1/NFAM1	45
28	GO:0022409	positive regulation of cell-cell adhesion	34/735	266/11964	3.77e-05	0.0057793	0.00535295	TNFRSF14/LCK/CD1D/IL10/CR1/ZAP70/DPP4/CD28/ICOS/IGFBP2/HES1/LEF1/IL7R/HLA-DOB/FYN/CARD11/CD24/PRKCQ/GATA3/ALOX5/RAG1/CD6/CD5/CCDC88B/CD3E/ETS1/CD27/TESPA1/RASGRP1/NOD2/PIK3R6/SKAP1/CEACAM6/SIRPG	34
29	GO:0030217	T cell differentiation	33/735	255/11964	3.81e-05	0.0057793	0.00535295	LCK/PIK3R3/CD2/RORC/CD1D/SLAMF6/CR1/ZAP70/CD28/CCR9/LEF1/IL7R/CAMK4/TCF7/ITK/IRF4/CARD11/CTSL/GATA3/ZEB1/RAG1/RAG2/CD3E/CD3D/CD3G/CD27/TESPA1/LIG4/BCL11B/RASGRP1/RORA/PIK3R6/IKZF3	33
30	GO:0001525	angiogenesis	45/735	394/11964	3.99e-05	0.00584927	0.00541776	ADGRB2/PIK3R3/S1PR1/SH2D2A/CHI3L1/IL10/PXDN/EPAS1/FN1/PPARG/CAMP/STAB1/ANXA3/LEF1/TGFBI/PDGFRB/FLT4/ADTRP/SRPK2/LOXL2/PTK2/NPR2/KLF4/DAB2IP/ALOX5/MCAM/ETS1/JAM3/HDAC7/FMNL3/KRT1/KLF5/SPRED1/RORA/ADGRG1/PIK3R6/PLXDC1/HOXB3/PRKCA/C3/NOTCH3/C5AR1/PLCG1/ADAMTS1/TYMP	45
31	GO:0046629	gamma-delta T cell activation	8/735	23/11964	4.19e-05	0.00593935	0.0055012	CCR9/LEF1/TCF7/ITK/JAML/CD3E/CD3G/NOD2	8
32	GO:0050808	synapse organization	39/735	325/11964	4.4e-05	0.00602049	0.00557636	SORT1/IL10/TANC1/ABI2/LRRN1/COLQ/PLXNB1/LAMB2/PFN2/PTPN13/TLR2/HOMER1/PCDHB13/SYNGAP1/LRFN2/FYN/DAB2IP/NLGN4X/ZC4H2/SLITRK4/RAB39B/SLIT1/LRP4/SPTBN2/CLSTN3/LRRK2/CACNB3/FARP1/GPHN/LGMN/NTRK3/CDK5R1/CNTNAP1/CDH2/C3/ADGRL1/ARHGAP33/DMPK/C5AR1	39
33	GO:0098742	cell-cell adhesion via plasma-membrane adhesion molecules	24/735	161/11964	4.6e-05	0.00602049	0.00557636	CELSR2/IL10/PCDH10/FAT1/PCDHB13/PCDHB18P/CDHR2/CLDN15/KLF4/CDH23/CDHR1/CD6/FAT3/DSCAML1/JAML/ROBO3/CLSTN3/PCDH9/CDH2/DSC2/ADGRL1/CEACAM6/CEACAM8/CELSR1	24
34	GO:0001906	cell killing	22/735	141/11964	4.67e-05	0.00602049	0.00557636	CD2/CD1D/CD1C/SLAMF6/CFH/CR1/SLC22A13/LTF/IL7R/NCR3/ARG1/DEFA4/DEFA1/DEFA1B/DEFA3/SH2D1A/KLRB1/CLEC7A/RASGRP1/PIK3R6/C3/PGLYRP1	22
35	GO:0050870	positive regulation of T cell activation	29/735	214/11964	4.79e-05	0.00602049	0.00557636	TNFRSF14/LCK/CD1D/CR1/ZAP70/DPP4/CD28/ICOS/IGFBP2/HES1/LEF1/IL7R/HLA-DOB/FYN/CARD11/CD24/PRKCQ/GATA3/RAG1/CD6/CD5/CCDC88B/CD3E/CD27/TESPA1/RASGRP1/NOD2/PIK3R6/SIRPG	29
36	GO:0030098	lymphocyte differentiation	41/735	350/11964	4.93e-05	0.00602049	0.00557636	LCK/PIK3R3/CD2/RORC/CD1D/SLAMF6/IL10/CR2/CR1/ZAP70/CD28/CCR9/LEF1/IL7R/CAMK4/TCF7/ITK/IRF4/CARD11/TPD52/CTSL/GATA3/ZEB1/RAG1/RAG2/POU2AF1/CD3E/CD3D/CD3G/CD27/TESPA1/LIG4/BCL11B/RASGRP1/RORA/ADGRG3/PIK3R6/IKZF3/CD79A/PGLYRP1/NFAM1	41
37	GO:0022407	regulation of cell-cell adhesion	44/735	388/11964	5.76e-05	0.00670273	0.00620826	TNFRSF14/LCK/CELSR2/CD1D/IL10/CR1/PELI1/ZAP70/DPP4/CD28/ICOS/IGFBP2/HES1/LEF1/IL7R/ADTRP/HLA-DOB/FYN/ARG1/CARD11/PTK2/KLF4/CD24/PRKCQ/GATA3/ALOX5/RAG1/RAG2/CD6/CD5/CCDC88B/CD3E/ETS1/CD27/TESPA1/PAWR/RASGRP1/NOD2/PIK3R6/SKAP1/PRKCA/CEACAM6/SIRPG/ADORA2A	44
38	GO:0007156	homophilic cell adhesion via plasma membrane adhesion molecules	17/735	95/11964	5.86e-05	0.00670273	0.00620826	CELSR2/PCDH10/FAT1/PCDHB13/PCDHB18P/CDHR2/CDH23/CDHR1/FAT3/DSCAML1/ROBO3/CLSTN3/PCDH9/CDH2/DSC2/CEACAM6/CELSR1	17
39	GO:0042832	defense response to protozoan	8/735	24/11964	5.95e-05	0.00670273	0.00620826	IL10/SLC11A1/IRF4/ARG1/DEFA1/DEFA1B/CCDC88B/CLEC7A	8
40	GO:0050807	regulation of synapse organization	24/735	164/11964	6.22e-05	0.00680768	0.00630547	IL10/TANC1/ABI2/LRRN1/COLQ/PTPN13/TLR2/HOMER1/LRFN2/FYN/DAB2IP/SLITRK4/SLIT1/LRP4/CLSTN3/LRRK2/FARP1/NTRK3/CDK5R1/CNTNAP1/CDH2/ADGRL1/ARHGAP33/DMPK	24
41	GO:0048667	cell morphogenesis involved in neuron differentiation	45/735	402/11964	6.5e-05	0.00680768	0.00630547	ECE1/CELSR2/TRIM46/ABI2/RAPH1/MAP2/FN1/PLXNB1/LAMB2/PLXNA1/HES1/RUFY3/SPP1/CYFIP2/SYNGAP1/FYN/UST/TIAM2/SEMA3C/EPHB6/SDC2/PTK2/NPR2/SLITRK4/PRKCQ/GATA3/PARD3/CDH23/CDHR1/SLIT1/SHTN1/LRP4/DSCAML1/ROBO3/LRRK2/ATP8A2/FARP1/BCL11B/CDK5R1/CNTNAP1/TBCD/CDH2/NOTCH3/ARHGAP33/BRSK1	45
42	GO:0045785	positive regulation of cell adhesion	44/735	390/11964	6.5e-05	0.00680768	0.00630547	TNFRSF14/LCK/CD1D/IL10/CR1/ZAP70/LIMS2/DPP4/CD28/ICOS/FN1/IGFBP2/FBLN2/LAMB2/HES1/LEF1/IL7R/RELL2/HLA-DOB/FYN/CARD11/CD24/PRKCQ/GATA3/ALOX5/RAG1/CD6/CD5/CCDC88B/EFEMP2/CD3E/ETS1/CD27/TESPA1/OLFM4/FMN1/RASGRP1/NOD2/ADGRG1/PIK3R6/SKAP1/PRKCA/CEACAM6/SIRPG	44
43	GO:0001562	response to protozoan	8/735	25/11964	8.28e-05	0.00805492	0.0074607	IL10/SLC11A1/IRF4/ARG1/DEFA1/DEFA1B/CCDC88B/CLEC7A	8
44	GO:0048514	blood vessel morphogenesis	49/735	455/11964	8.29e-05	0.00805492	0.0074607	ADGRB2/PIK3R3/S1PR1/SH2D2A/CHI3L1/IL10/PXDN/EPAS1/FN1/PPARG/CAMP/STAB1/HES1/ANXA3/LEF1/TGFBI/PDGFRB/FLT4/ADTRP/SRPK2/LOXL2/PTK2/NPR2/KLF4/DAB2IP/ALOX5/EFEMP2/MCAM/ETS1/JAM3/HDAC7/FMNL3/KRT1/KLF5/SPRED1/MYO1E/RORA/ADGRG1/PIK3R6/PLXDC1/HOXB3/PRKCA/CDH2/C3/NOTCH3/C5AR1/PLCG1/ADAMTS1/TYMP	49
45	GO:0045061	thymic T cell selection	7/735	19/11964	8.43e-05	0.00805492	0.0074607	ZAP70/CD28/CARD11/GATA3/CD3E/CD3D/CD3G	7
46	GO:0048812	neuron projection morphogenesis	48/735	443/11964	8.43e-05	0.00805492	0.0074607	ECE1/CELSR2/TRIM46/ABI2/RAPH1/MAP2/FN1/PLXNB1/LAMB2/PLXNA1/RUFY3/SPP1/ITGA1/CYFIP2/SYNGAP1/PACSIN1/FYN/UST/TIAM2/SEMA3C/EPHB6/SDC2/RIMS2/PTK2/NPR2/DAB2IP/SLITRK4/PRKCQ/GATA3/PARD3/SLIT1/SHTN1/LRP4/DSCAML1/ROBO3/LRRK2/RASAL1/ATP8A2/FARP1/BCL11B/CDK5R1/CNTNAP1/EPB41L3/CDH2/NOTCH3/ARHGAP33/BRSK1/ADORA2A	48
47	GO:0019730	antimicrobial humoral response	11/735	47/11964	9.9e-05	0.00926432	0.00858088	SLC11A1/LTF/CAMP/CXCL1/DEFA4/DEFA1/DEFA1B/DEFA3/NOD2/PGLYRP1/PLA2G6	11
