# Supplementary material for: Genomic and Global Gene Expression Profiling in Pediatric and Young Adult Acute Leukemia with PICALM::MLLT10 Fusion
Source: Research Square preprint supplement (doi:10.21203/rs.3.rs-3348788/v1), 2023-09-20
Supplement: Supplementary file 4 [file d0c0beb6b26fcad2563cfae5.xlsx]

## Sheet: S1_Samples_testing platforms
Case ID	Diagnosis	Specimen	Testing Time point	RNA-seq (Y/N)	WGS/WES/Panel DNA-seq	Cytogenetics (Y/N)	Karyptype
SJ030459	AML	BMA	Relapse	Y	WGS	Y	46,X,-Y,t(10;11)(p12;q14),i(17)(q10),+19 [16/20] //46,XX [4/20]
SJ030988	AML	BMA	Primary refractory	Y	WGS	Y	46,XY,t(10;11)(p12;q21) [6/7]
SJ031965	AUL	BMA	Relapse	Y	WGS	Y	46,XY,del(6)(q13q25),add(7)(q36),t(10;11)(p13;q21)[3]//46,XX[17]
SJ033011	AML	Peripheral Blood	Primary refractory	Y	Panel DNA-seq (FoundationOne Heme)	Y	45,X,-X,add(5)(p13),t(10;11)(p12;q14),add(17)(p11.2)[20]
SJ032188	AML	Peripheral Blood	Primary refractory?	Y	WGS	N	N/A
SJ061255	AML	BMA	Relapse	Y	WGS	Y	46,XY,del(2)(p21p25),inv(5)(p15.1q11.2),t(10;11)(p12;q14),i(17)(q10) [19/20]/46,XY [1/20]
SJ062998	AML	BMA	Primary refractory	Y	WGS	Y	47,XY,+4,t(10;11)(p12;q14) [2/20] 47,idem,i(17)(q10) [3/20] 46,XY [15/20]
SJ061501 (D)	AML	BMA	Diagnosis	Y	WGS	Y	46,XY,t(10;11)(p12;q14),der(12)t(12;13)(p13.1;q12.3),-13,+19
SJ061501 (R)	AML	BMA	Relapse	Y	WGS	N	N/A
SJ074161	AML	Peripheral Blood	Diagnosis	Y	None	Y	46,XY,del(9)(q13q22),t(10;11)(p12;q22),der(19)t(11;19)(q22;p13.3) [20/21]/46,XY [1/21]
SJ033167	AML	BMA	Primary Refractory	Y	Panel DNA-seq (SJCRH in-house test)	N	N/A
SJ033585	AML	BMA	Diagnosis	Y	WGS	N	N/A
SJ030880	T-ALL	BMA	Diagnosis	Y	WGS	N	N/A
SJ030907	T-ALL	BMA	Diagnosis	Y	WGS	N	N/A
SJ031662	T-ALL	Pleural fluid	Diagnosis	Y	WGS	N	N/A
SJ031798	MPAL, T/B	BMA	Relapse	Y	WGS	N	N/A
SJ031904	T-ALL	Peripheral Blood	Diagnosis	Y	WGS	N	N/A
SJ031944	ETP-ALL	BMA	Diagnosis	Y	WGS	N	N/A
SJ032955	T-LLy	Lymph node	Diagnosis	Y	WES	N	N/A
SJ033522	T-ALL	BMA	Diagnosis	Y	WGS	N	N/A
SJ033817	T-ALL/LLy	PB	Diagnosis	Y	WGS	N	N/A
Note:	AML, acute myeloid leukemia
	T-ALL, T-lymphoblastic leukemia;
	T-LLy, T-lymphoblastic lymphoma;
	MPAL, mixed phenotype acute leukemia (MPAL);
	ETP-ALL, early T-cell precursor lymphoblastic leukemia/lymphoma;
